# Supplementary material for: Short and long sleeping mutants reveal links between sleep and macroautophagy
Source: eLife. 2021 Jun 4;10:e64140. doi: 10.7554/eLife.64140 (PMC8177895; doi:10.7554/eLife.64140)
Supplement: Figure 1—figure supplement 1—source data 1. [file elife-64140-fig2-data2.xlsx]

## Sheet: Panel 1B
Tau			FFT
iso31	aus/aus		iso31	aus/aus
23.25	24		0.058	0.038
23.5	23.83		0.035	0.023
23.08	arrhythmic		0.054	arrhythmic
23.5	24		0.65	0.08
22.83	23.92		0.031	0.035
23.17	23.5		0.024	0.012
23.08	23.83		0.028	0.045
23.42	24		0.102	0.03
23.42	23.58		0.05	0.032
arrhythmic	24		arrhythmic	0.091
23.25	arrhythmic		0.045	arrhythmic
22.83	arrhythmic		0.102	arrhythmic
23.25	arrhythmic		0.064	arrhythmic
22.82	arrhythmic		0.038	arrhythmic
23.67	24		0.018	0.015
23.17	24		0.044	0.017
23.25	24.08		0.032	0.041
23	arrhythmic		0.068	arrhythmic
23.25	arrhythmic		0.14	arrhythmic
23.42	arrhythmic		0.025	arrhythmic
23.17	23.58		0.058	0.015
23.5	arrhythmic		0.038	arrhythmic
23.5	23.92		0.037	0.027
22.92	23.58		0.022	0.015
22.5	23.58		?	0.018
22.92	arrhythmic		0.025	arrhythmic
23.08	23.08		0.067	0.02
23.08	23.67		0.02	0.06
23.42	23.58		0.048	0.013
23.33	arrhythmic		0.046	arrhythmic
22.75			0.045
23.33			0.088
