# Supplementary material for: Short and long sleeping mutants reveal links between sleep and macroautophagy
Source: eLife. 2021 Jun 4;10:e64140. doi: 10.7554/eLife.64140 (PMC8177895; doi:10.7554/eLife.64140)
Supplement: Figure 1—source data 1. [file elife-64140-fig1-data1.xlsx]

## Sheet: Panel 1B
Total Sleep				Day Sleep				Night Sleep
iso31	aus/+	aus/aus		iso31	aus/+	aus/aus		iso31	aus/+	aus/aus
843.2	659.6	300.4		257.8	93	108		585.4	566.6	192.4
915.6	637.6	325.4		375.4	163.6	72.6		540.2	474	252.8
872.6	625.8	143.2		353.8	177.6	65.6		518.8	448.2	77.6
718.4	524.2	424		210	143	239		508.4	381.2	185
838.6	447	534.4		268.8	9.4	79.4		569.8	437.6	455
818.6	439.8	93.2		242	70.8	74.8		576.6	369	18.4
548	441.8	306.2		184.6	74.2	57.4		363.4	367.6	248.8
977.2	601.6	114.2		369	127.2	104.6		608.2	474.4	9.6
705.4	559	158.2		197	160.2	87.4		508.4	398.8	70.8
808.6	617.8	210.2		273.8	163.6	70.2		534.8	454.2	140
1081.4	516.8	235.4		435.6	78.6	63.8		645.8	438.2	171.6
736.2	733.2	258.6		244.6	197.6	63.2		491.6	535.6	195.4
735	1007.67	192.2		225	359.667	115.2		510	648	77
851.8	952	329.4		265.4	274.8	102		586.4	677.2	227.4
713.8	702.2	64.2		181.6	220.2	31.4		532.2	482	32.8
834.4	774.2	357.8		244	290	80.2		590.4	484.2	277.6
812.4	266.4	40		235.8	9	22.8		576.6	257.4	17.2
899.2	942.8	146.6		289.6	377	89.4		609.6	565.8	57.2
910.2	605.8	82.8		269.6	101	25.2		640.6	504.8	57.6
1028	559.6	516		366	56.6	122.5		662	503	393.5
1014.8	713.6	239		444.2	208.2	91.5		570.6	505.4	147.5
1115.4	961.4	135		462.2	337.2	47		653.2	624.2	88
947.4	801.2	58.5		305.8	278.4	32.5		641.6	522.8	26
645.8	643.6	742.5		232.6	170.4	175.5		413.2	473.2	567
867.5	658.4	185.5		226.875	195.6	64.5		640.625	462.8	121
962.25	1007.4	513		411.25	423.2	124.5		551	584.2	388.5
727.5	640.8	838.5		216.375	113.8	379		511.125	527	459.5
1002.38	663.4	229.714		389	120.8	114.714		613.375	542.6	115
1058.38	808.2	50.2857		435.375	311	20.2857		623	497.2	30
883	1009.4	189.143		279.125	378.2	44.2857		603.875	631.2	144.857
851.5	615.8			301.125	129.2			550.375	486.6
891.625	769.2			290.25	197.4			601.375	571.8

## Sheet: Panel 1C
Day Bout Length				Night Bout Length
iso31	aus/+	aus/aus		iso31	aus/+	aus/aus
16.9784	5.61152	4.78969		52.7231	72.0107	21.3718
25.699	9.41231	3.8779		55.153	48.2776	17.5061
46.1675	16.9061	5.4136		52.4675	31.381	6.81679
12.1473	9.60772	8.17712		41.7623	25.4902	9.31549
16.54	3.86667	3.42975		65.2344	34.8592	96.8407
12.5005	7.62011	3.39772		72.8967	29.213	3.11042
7.92165	5.75553	4.39286		22.4886	44.5848	8.69801
20.39	8.65074	4.55332		71.315	38.5376	1.42381
11.4662	12.7654	4.33978		39.0681	29.4414	4.21719
27.8239	20.3462	5.01249		64.2821	88.3022	12.0695
36.3289	8.04615	6.52618		296.03	29.3028	13.0083
10.9377	46.5369	3.31493		40.8365	48.9768	10.8858
18.8632	21.9705	10.2482		48.2781	89.3651	5.61667
14.8315	11.641	5.10181		84.6427	313.587	9.28315
12.0294	27.6282	2.9375		50.4325	95.3651	2.68862
12.3696	24.6424	4.65794		69.6541	45.9453	10.867
14.4522	5.90417	3.77652		69.3444	20.1625	3.32589
18.9794	51.2955	4.13261		136.979	64.9661	3.48142
34.5186	8.21845	3.05985		116.446	29.387	8.45833
26.4565	8.99358	7.56111		266.45	45.2838	30.4167
42.6036	13.3507	5.23214		198.336	52.0716	5.46535
42.8433	61.7248	4.53846		165.935	215.848	6.79861
26.2082	35.4371	3.78788		308.7	50.5756	8.16667
11.7029	10.4113	4.81579		45.7769	30.3961	31.6687
26.7781	46.75	2.4		247.424	57.1683	3.55
37.0354	39.7713	5.84674		161.508	77.03	47.0325
22.2198	6.88627	11.8881		48.5157	32.389	12.9444
38.2562	36.7929	6.47671		266.964	36.4164	7.24881
31.9469	24.0436	2.79333		75.2897	66.5479	2.376
28.7534	54.0861	2.92483		114.16	106.242	7.64669
14.3891	23.9107			56.0046	68.6415
36.186	22.5545			120.155	55.0733

## Sheet: Panel 1D
Day Bout Number				Night Bout Number
iso31	aus/+	aus/aus		iso31	aus/+	aus/aus
18.4	17.4	21		11.6	9	19.6
15.4	17.4	18.6		11.2	11	25.8
10.4	11	14.6		12.8	15	12.2
20	15.6	25.6		15.6	15.8	15.6
16.6	2.4	18.6		8.8	13.4	16.8
22.8	10	17.4		9.6	13.4	6.6
23.4	13.6	14		21.8	10.8	32.6
20.8	14	21.6		9.2	14.4	4.2
20.4	13.4	17.4		13.8	14.2	17
11.2	10.6	13.8		9	8	13
13	9.4	8.4		3	15.2	9.2
24	9	15.4		15.8	14	20.6
13.8	24	12.2		14.2	9	8.8
19	24.6	20		10.2	3	22.6
15	8	11		12.6	6	12.6
23.4	15	18.4		9.2	15.2	31.2
16.6	2.6	5.8		9	14.2	4.4
18.8	11.2	20.2		6.6	12.6	13.8
12	13.4	7.6		7	19	5
14	6.6	16.5		2.8	12	13
10.6	16	17		8.2	11.2	27.5
12.6	7.2	7		6.6	7	13
11.8	9.2	8.5		3.6	10.6	3.5
20.2	17	31		11.4	18.8	18
10.625	6.6	22		4.75	8.2	32.5
12.625	11.4	21.5		5.75	9.4	9
11.625	16	32.5		11.875	17.8	35.5
12	7	16.8571		3.125	17	14.7143
15.125	13.2	6.85714		9.5	8.8	11
13.25	7.6	14.1429		6.75	6.8	18.4286
21.375	6.8			13.375	8.6
11.875	11.8			6.25	12.2

## Sheet: Panel 1E
ZT12 Sleep Latency
iso31	aus/+	aus/aus
35.2	34.8	44
56.8	42.4	23.8
38.8	12.4	37.2
25.2	28.8	29.8
40	21.2	118.2
26	19.2	37
41.8	20.8	113
39	24.2	74.6
62.6	14.2	31.6
24.6	63.8	112.2
53.2	28.2	240.25
24.6	22	240.2
21.8	10.6	80
28.6	46	172.8
63.6	27.8	31.25
34.2	26.8	305.25
32	101.6	57.5
57.75	33	79.9975
23.5	74.6	65
64	86.8	11
111	104.6	332.75
45.25	96.4	183.5
51.5	75.4	173.75
61.75		9.2
29.25		65
83.25		175
30.5		351
23.5		173.8
45
57
Note: different pool of individual flies from other metrics.

## Sheet: Panel 1F
Activity Index
iso31	aus/+	aus/aus
1.65597	1.52655	1.33492
1.67444	1.34868	1.49723
1.80841	1.74312	1.72037
1.41398	1.65512	1.99562
2.39559	1.8351	1.49504
1.7042	1.9112	2.23236
1.52931	1.59812	1.27072
1.53398	1.34913	2.04669
1.5062	1.7887	1.36228
1.6971	1.72895	2.2732
2.07319	1.62594	1.89181
1.39853	1.75434	1.85828
1.64545	0.88689	1.63698
1.68295	1.20196	1.64677
2.4026	1.75048	1.62122
1.2872	1.61925	1.20478
2.06544	1.89845	2.56072
1.39492	1.80983	1.76272
2.18858	1.34096	1.87279
1.62235	1.73144	1.81772
1.6949	1.55074	1.96795
1.55479	1.68566	2.2144
2.17715	1.5694	2.67315
1.30522	1.51417	2.29238
1.76987	2.12234	2.28445
2.24555	1.55452	2.03459
1.89344	1.21121	2.39211
1.72759	1.55856	1.77382
1.11012	1.3557	1.53385
1.77363	1.96474	1.50021
1.27604	1.49586
1.42361	1.60858
