# Supplementary material for: Short and long sleeping mutants reveal links between sleep and macroautophagy
Source: eLife. 2021 Jun 4;10:e64140. doi: 10.7554/eLife.64140 (PMC8177895; doi:10.7554/eLife.64140)
Supplement: Figure 2—figure supplement 1—source data 1. [file elife-64140-fig4-data4.xlsx]

## Sheet: Panel 2A
Total Sleep
iso31	nrx/nrx	aus/aus
647.75	844	130.75
673.25	835.5	101.75
895	891	125.25
817.75	960.75	86.25
974	874.75	161.25
781.25	697	157.75
772.75	792.75	246.5
999.75	955.5	35
912.25	789.75	149.75
1005.25	754.5	372.75
800.75	859.5	175.75
917.5	626.25	149.25
746.25		22.5
805.75
859
1095.5

## Sheet: Panel 2B
Total Sleep
iso31	aus/nrx	aus/aus
518.2	820.667	104.6
538.6	674.667	81.4
716	731.333	100.2
654.2	684	69
779.2	608.333	129
625	550.167	126.2
618.2	672.667	197.2
799.8		28
729.8		119.8
804.2		298.2
640.6		140.6
734		119.4
597		18
644.6
687.2
876.4
