# Supplementary material for: Short and long sleeping mutants reveal links between sleep and macroautophagy
Source: eLife. 2021 Jun 4;10:e64140. doi: 10.7554/eLife.64140 (PMC8177895; doi:10.7554/eLife.64140)
Supplement: Figure 2—figure supplement 2—source data 1. [file elife-64140-fig5-data5.xlsx]

## Sheet: Panel A
Total Sleep
elavGal4/+;uas-dcr/+	uas-cg16791 RNAi#1/+	elav>dcr;RNAi
675	614	561.167
871.167	617.333	295.667
711	739.167	148.5
645.833	807.667	348.167
487.833	743	269.667
784.167	445	197.167
943.333	611	214.833
604	745.833	325.833
796	362.333	16.8
496.667	622.833	231.167
	740.833
	747
	487

## Sheet: Panel B
Total Sleep
elavGal4/+;uas-dcr/+	uas-cg16791 RNAi#1/+	elav>dcr;RNAi
931.167	1125.67	423.167
653.167	1134.67	622.667
892.667	1039.5	261
1044.67	1062.33	685.667
661.833	969.5	265.167
890.167	1099.33	509.833
795.333	944.167	554.167
774.833	1147.5	483
976.5	927.667	246.833
988.333	1075.5	849.5
825		635.333
663.833

## Sheet: Panel C
Total Sleep
uas-dcr/+;actinGS/+ RU-	uas-dcr/+;actinGS/+ RU+	uas-cg16791 RNAi#2 RU-	uas-cg16791 RNAi#2 RU+	actin>dcr;RNAi RU-	actin>dcr;RNAi RU+
1063	822	885.5	882.5	719	562
1036	765	339	884.5	795.5	738
924	581.5	774	888	754	543.5
918.5	745	1015	926.5	1002	580
939.5	866	992.5	932	655	594.5
719	791	742.5	769.5	516.5	639.5
735	863.5	965.5	977	804	599
1148	950	974	888	1167	534.5
1005	607.5	1045	856	828	530.5
744	435.5	763	855.5	894.5	555.5
1025	598	874.5	1067	1192	618.5
740	502.5	985.5	919.5	847	536
719.5	124	919.5	945	470.5	675
992	814	985.5	1072	837.5	676
1134	821.5	960	891.5	863	691
887.5	674.5	746	873	682	581.5
833.5	618.5	940.5	1119	825.5	675.5
722.5	732.5	925.5	853.5	673.5	564
783	825.5	873.5	1037	622	637
708.5	902	851.5	851	739.5	541
770.5	740.5	797.5	734.5	766	915.5
497	768	802	906.5	761	575.5
744	772.5	1012	1047	512	598.5
499.5	1045	827	1086	757	721.5
709.5	774	886.5	947.5	738	617.5
857	843	902.5	1014	694.5	705
785	976	850.5	1023	599.5	542
908.5	716	889	963.5	700	639.5
711	713	975	884		607
961	947.5	1016	904		577.5
693.5	832.5	929	942		572.5
	939.5		885.5		689.5
	830.5		932.5		737
	1013		833		577
	640.5		697
	985		932.5
	722		951
	990		1027
	1064		1080
	1046		914.5
	985		1024
	933.5		1105
	677		906
	891.5		885.5
	608
