# Supplementary material for: Short and long sleeping mutants reveal links between sleep and macroautophagy
Source: eLife. 2021 Jun 4;10:e64140. doi: 10.7554/eLife.64140 (PMC8177895; doi:10.7554/eLife.64140)
Supplement: Figure 2—source data 1. [file elife-64140-fig2-data1.xlsx]

## Sheet: Panel 1C
Total Sleep
uas-dcr/+;nsybGal4/+	uas-cg16791 RNAi#1/+	nsyb>dcr;RNAi
625	766.5	630.5
624	881.5	326.5
916	909	504
572	773.5	586
703.5	631	593
532	723	599.5
736	775	391
668	828	729.5
771	706	603
432.5	770.5	289
790	663	316.5
1046.5	753	631.5
794.5	935.5	555
724	1021.5	558
498	805.5	647.5
676	967.5	406
701	861	713.5
644.5	856	569
484	943.5	676
705	907.5	665.5
722.5	946.5	472
650.5	878	799
526	1209.5	655.5
725	939	240.5
1040	960.5	764.5
739	915	513.5
867.5	805.5	1005
808	733.5
599.5	708
538.5	981.5
729.5	860.5
687	1070

## Sheet: Panel 1D
Total Sleep
uas-dcr/+;nsybGal4/+	uas-cg16791 RNAi#1/+	nsyb>dcr;RNAi
625	746	827.5
624	940.5	807.5
916	925.5	631
572	873.5	662
703.5	851.5	302.5
532	797.5	786
736	802	531.5
668	1012	664
771	827	224
432.5	886.5	599.5
790	902.5	676.5
1046.5	850.5	856.5
794.5	889	752
724	975	565
498	1016	305.5
676	929	632.5
701	925.5	552.5
644.5	873.5	348
484	939	619.5
705	840.5	282.5
722.5	829.5	619.5
650.5	652.5	547.5
526	749.5	252.5
725	932	541
1040	984.5	195
739	925	739.5
867.5	1048	540.5
808	963.5	281.5
599.5	954	513.5
538.5	866	355.5
729.5	945	490.5
687	650.5	639
