# Supplementary material for: Short and long sleeping mutants reveal links between sleep and macroautophagy
Source: eLife. 2021 Jun 4;10:e64140. doi: 10.7554/eLife.64140 (PMC8177895; doi:10.7554/eLife.64140)
Supplement: Figure 3—figure supplement 1—source data 1. [file elife-64140-fig7-data7.xlsx]

## Sheet: Panel C
Total Sleep
aus/+	cg16791-KO/+	aus/cg16791-KO	aus/aus
1077.83	944.5	643	297.5
1004.33	1019	305.167	438
1126	987.5	560.167	403.333
972	919.667	301.5	647.333
931.833	1031.33	648.167	579.5
890.167	947.833	144.5	380.833
979	1036.5	275.333	538.167
837.667	900.667	416.5	706.333
1067.5	857.833	684.667	739.167
641.667		102.333
583		742.333
767.333		803.333
935.5
593.333
457
504.833

## Sheet: Panel D
Total Sleep
elavGal4/+;aus/aus	uas-CG16791-FL/+;aus/aus	elav>CG16791-FL;aus/aus
436.4	173	783.4
618	383.2	647.6
444.2	483.4	1024.4
146.8	542.6	764.8
22.8	375.8	997.2
290.6	357.2	813.4
36.2	356.2	896.4
412.8	414.6	781.6
227.25	581.2	307.25
71.75	498.8	643.5
256	329.6	596.75
513.5	172.2	523.5
219	159.25	258.75
261.5	113	188.5
352.5	61.25	487.5
296.75	4
110.25	166.5
	181.25
	296
	77.5
	194
	190
	317.75
	128.5
	265.75
