# Supplementary material for: Short and long sleeping mutants reveal links between sleep and macroautophagy
Source: eLife. 2021 Jun 4;10:e64140. doi: 10.7554/eLife.64140 (PMC8177895; doi:10.7554/eLife.64140)
Supplement: Figure 3—source data 1. [file elife-64140-fig3-data1.xlsx]

## Sheet: Panel 3A
Total Sleep
aus/+	cg16791-P1/+	aus/cg16791-P1
974.8	1004.6	775.2
605	888.4	257.2
940.4	620.2	622.2
795.8	960.4	678.2
778.6	929.2	299.4
770.4	880	435.4
1050.4	868.8
791.8	954.8
970.8	834.4
740	1208.2
756	1047.4
1061.6
662.6

## Sheet: Panel 3B
Total Sleep
aus/+	cg16791-KO/+	aus/cg16791-KO	aus/aus
841.833	853.333	518	552.833
496.5	756.333	66	520.167
572.667	584.667	130.667	509.167
773.333	811	258.667	197
553.667	710.833	342.667	612.5
716.333	468	330.833	245.167
471.5	422	356.5	370.167
483.167	587.667	257	21.4
665	800	431.167	246.333
878.167	598.167	544
1084.83	690	484.167
868.333	846	376
847.833	800.667	90.6667
647.5	936.667	512.667
	512.333	669.333
	710.5	358.667
	763.333	611.5
	617.167	507.833
	846.333
	707.833

## Sheet: Panel 3C
Total Sleep
aus/aus	elavGal4/+;aus/aus	uas-CG16791/+;aus/aus	elav>CG16791;aus/aus
68.2	436.2	783.5	609.667
718.4	617.6	725.833	1003.5
91.6	443.8	243	1272.83
176.8	146.6	65.6667	1003.67
321	22.6	138.333	719.833
91.6	290.2	322.333	640.833
221	36	210.5	648.333
72.6667	412.6	201.333	972.667
531.5	448.667	240	622
202.333	389.5	158.833	469.333
436	369.833	518.833	979.167
105.667		229.333	826.5
285.167		121.167	449.667
461.5		404.167	1035.83
257.667		325	704.167
		482	391.167
		373.5	885.333
		464.5	631.167
		415.333	757
		421.667	674.833
		608.833	1151.33
		313.5	1249.5
		480.333	903.833
		489.167
		668.5
		648.833
		456.5
		462.167
		379.167
		252.667
		282.167
		373.333
		140.5
		434.5
		267.167
		307
		551.667
		214.667
		41.8333
		437.333
		503.167
		419
