# Supplementary material for: Short and long sleeping mutants reveal links between sleep and macroautophagy
Source: eLife. 2021 Jun 4;10:e64140. doi: 10.7554/eLife.64140 (PMC8177895; doi:10.7554/eLife.64140)
Supplement: Figure 4—source data 1. [file elife-64140-fig4-data1.xlsx]

## Sheet: Panel 4A
Total Sleep
ausP2k-gal4/+;aus/aus	uas-cg16791/+;aus/aus	P2k>cg16791;aus/aus
426	983	327.5
145.333	727.833	582
374.167	2.5	633
163	148.5	818.167
229.333	28.3333
192.333	165.4
	142
	143.833
	250.833
	5
	180
	366.333
	303.5

## Sheet: Panel 4B
Total Sleep
c929-gal4/+;aus/aus	uas-cg16791/+;aus/aus	c929>cg16791;aus/aus
529.833	480.667	766.4
477	233.167	1225.8
666.167	241.833	801.2
455.167	370.167	610.8
384.667	452.333	850.2
434.6	354.333	686
417.2	222.6	582.2
442.6	167.8	996.8
	116	587.5
	345.2	498

## Sheet: Panel 4C
Total Sleep
aus/+	dimm/+	dimm/+;aus/+
266.6	720	574.2
943	650.6	569
606.2	830.6	459.8
559.8	849.2	551
714	769.8	562.4
961.6	800.8	528
801.4	847.2	551
643.8	815.2
658.8	820
1007.8	937.4
641.4	928
663.6	821.8
808.4	866.6
1009.6	774.8
616	878.8
770	941.6
