# Supplementary material for: Short and long sleeping mutants reveal links between sleep and macroautophagy
Source: eLife. 2021 Jun 4;10:e64140. doi: 10.7554/eLife.64140 (PMC8177895; doi:10.7554/eLife.64140)
Supplement: Figure 5—source data 1. [file elife-64140-fig5-data1.xlsx]

## Sheet: Panel 5B
Puncta #
control	aus/aus
12.07	6.324
17.019	13.325
12.711	5.757
10.602	9.115
9.846	15.962
9.85	6.754
10.217	9.86
6.603	7.804
7.387	8.602
6.416	25.179
11.545	13.393
9.949	12.97
	8.95

## Sheet: Panel 5C
Puncta Size
control	aus/aus
2.07578	1.63834
2.39583	2.22868
1.90663	2.16656
1.70394	1.82775
2.93975	2.00764
2.12532	2.14871
1.70274	2.28551
1.76036	1.88755
2.18186	1.79869
1.42246	2.6635
2.01058	2.04894
1.90129	2.00529
	1.79648

## Sheet: Panel 5D
Autophagosome %			Autolysosome %
control	aus/aus		control	aus/aus
29.826	49.0038		70.174	50.9962
29.2438	32.4803		70.7797	67.5647
33.593	67.1878		66.407	32.8122
30.2301	40.8886		69.7604	59.1443
27.6457	34.3566		72.4558	65.9942
33.5736	55.7003		66.4873	44.2997
31.9174	35.1623		68.0924	64.8377
34.9992	40.2998		65.0008	59.6873
26.5872	40.7231		73.4398	59.3002
45.7918	37.3287		54.2082	62.6713
27.9515	39.3937		72.0485	60.6063
36.8077	38.6584		63.2023	61.3416
	42.581			57.419
