# Supplementary material for: Short and long sleeping mutants reveal links between sleep and macroautophagy
Source: eLife. 2021 Jun 4;10:e64140. doi: 10.7554/eLife.64140 (PMC8177895; doi:10.7554/eLife.64140)
Supplement: Figure 6—figure supplement 1—source data 1. [file elife-64140-fig11-data11.xlsx]

## Sheet: Panel A
Total Sleep				Day Sleep				Night Sleep
iso31	bchs/+	bchs/bchs		iso31	bchs/+	bchs/bchs		iso31	bchs/+	bchs/bchs
892.333	1136.67	1093.67		351.667	464.333	449.333		540.667	672.333	644.333
823.333	1138	1114.67		320.667	491	419.333		502.667	647	695.333
754.667	888.667	1019		285.667	310.667	326		469	578	693
1032	1031.67	1031		401.333	357.333	362		630.667	674.333	669
955.333	1069.67	1029.33		372.333	421.333	369.333		583	648.333	660
915.667	1167.33	1112.33		364	493	422.333		551.667	674.333	690
1097.67	745	1063.33		465.333	316.667	357		632.333	428.333	706.333
791.333	1063.33	1076.33		361.333	412.333	385		430	651	691.333
1091.33	1078	1031.67		496	422	413		595.333	656	618.667
962	1114	1041.67		404.333	484.667	415.333		557.667	629.333	626.333
932.667	1181.33	1016.67		384.333	516	375.333		548.333	665.333	641.333
974	1053.67	1079		379.667	397.333	419.667		594.333	656.333	659.333
1075	1019.67	1061		480.333	364.667	391.667		594.667	655	669.333
951.667	1045	1023		408	426.333	326.333		543.667	618.667	696.667
793.667	1033.67	1178.67		275.667	391.667	478		518	642	700.667
857	1052	1148		350.333	394.333	464		506.667	657.667	684
1107	1034	1069		492	427	420.5		615	607	648.5
1194.5	1124.5	1054.5		530	504.5	376		664.5	620	678.5
1012	1165	1248.5		489.5	488	538		522.5	677	710.5
826.5	989	941.5		379.5	375.5	329.5		447	613.5	612
937.5	993.5	1152		399.5	389	466.5		538	604.5	685.5
987	1243.5	1074.5		355.5	555	408		631.5	688.5	666.5
850	1010	1080		314.5	366.5	372.5		535.5	643.5	707.5
1031	1064	979.5		581	476.5	315.5		450	587.5	664
962	1247.5	1111		395.5	591.5	492.5		566.5	656	618.5
924.5	1055	1201.5		385.5	478	523		539	577	678.5
894.5	1191	1177		405	529	480		489.5	662	697
917	1117	1120		376.5	481	462.5		540.5	636	657.5
1035.5	1104.5	1149.5		447	455	488		588.5	649.5	661.5
1054	1105	1038.5		432.5	455.5	393.5		621.5	649.5	645
909	1061	1142		414	402	440		495	659	702
929	1030.5	1120.5		373.5	392.5	474.5		555.5	638	646

## Sheet: Panel B
Female Total Bout Length				Female Day Bout Length				Female Night Bout Length				Male Total Bout Length				Male Day Bout Length				Male Night Bout Length
iso31	bchs/+	bchs/bchs		iso31	bchs/+	bchs/bchs		iso31	bchs/+	bchs/bchs		iso31	bchs/+	bchs/bchs		iso31	bchs/+	bchs/bchs		iso31	bchs/+	bchs/bchs
19.9468	22.5791	24.9603		12.4706	15.8131	17.7556		29.9923	30.2537	35.1896		33.4144	50.608	31.157		22.1709	28.3995	17.3311		50.2974	165.183	75.3182
37.5072	17.9093	40		14.9145	12.6608	19.1482		95.0159	22.1782	129.989		33.5785	37.2939	40.2981		19.728	22.9452	18.0942		64.563	76.1434	307.363
24.0925	30.4734	22.0769		12.3518	14.7844	15.4887		45.4361	60.3212	28.8489		25.8728	28.6366	32.9657		14.4919	14.6066	13.1112		55.2157	59.9185	125.347
23.6975	23.8263	30.8407		16.3655	12.1182	19.585		33.5558	53.5579	59.3667		42.1487	49.7439	38.9033		27.8738	22.167	16.8006		63.0883	163.103	286.587
16.9536	16.7165	24.1944		9.73587	9.83168	14.6789		25.8824	25.1586	37.2862		29.2448	48.1842	36.0448		19.3552	28.5109	20.7074		46.2675	110.37	97.3677
17.318	16.6944	30.2445		11.7316	10.0909	17.1169		22.3667	21.5329	64.563		32.5714	44.6273	44.127		20.1604	26.8234	19.0112		57.3079	90.6713	249.306
20.4867	23.4481	30.1885		11.9511	12.4207	13.5318		32.5873	37.2407	55.0593		36.7075	20.8947	38.1154		24.2461	17.5926	13.7374		63.9306	24.781	402.2
21.1117	27.9315	24.53		15.8525	16.5372	12.9772		26.549	39.2833	42.452		21.7367	38.6627	34.8859		16.982	23.8171	16.1593		29.3751	64.1185	163.47
21.3284	23.6136	23.6879		7.63492	9.0095	15.2926		25.8878	39.0377	34.8687		35.141	31.3705	33.035		25.3253	18.6878	23.3365		62.1471	68.4233	48.1476
19.3058	35.0839	22.8081		9.22792	30.2234	14.2843		25.5393	40.8117	34.1853		26.3486	63.6539	38.0853		18.6228	48.7625	22.6355		38.1802	100.537	90.2286
16.4516	19.078	36.2258		12.6468	8.22129	24.0909		19.6005	25.7594	50.9429		31.4805	80.6486	31.1432		21.2593	67.8274	17.4603		54.1968	152.368	77.8196
28.4616	27.2221	25.815		11.2934	11.9997	14.104		81.8197	84.9079	49.6991		45.3274	29.1018	33.4355		25.8058	15.7783	18.0072		92.8405	66.1948	148.655
17.5095	22.0685	28.2407		7.4414	14.9814	18.4495		28.8407	29.4822	42.6321		52.0766	37.7119	31.8332		63.5611	18.1263	17.6925		51.4731	105.583	85.296
14.4765	33.3867	31.2761		10.7185	11.7512	19.9111		17.3742	138.183	45.4357		28.8237	36.0496	44.2611		22.0235	20.7255	17.7365		58.0133	81.1485	302.889
22.1343	28.4476	18.3752		11.7669	22.274	11.1929		39.8406	34.6848	30.7383		22.7384	41.4965	49.9122		15.5362	24.7608	23.6521		30.4105	79.3893	194.778
19.8173	21.7958	27.4515		9.33743	6.39259	12.0765		44.9202	30.2556	48.0574		23.0257	45.175	52.5369		15.0362	21.0012	26.2429		42.4497	185.462	171
29.4662	46.3364	34.1693		33.4222	17.0682	16.4974		27.4722	380.273	114.175		68.6861	36.6086	32.6614		90.1	27.2936	23.5258		60.2946	57.0478	78.2037
19.183	22.5307	32.8699		11.0119	13.5242	13.0292		29.3182	38.5357	135.533		136.149	56.3446	42.3381		94.475	32.5375	19.5397		275.833	139.825	124.05
28.7286	24.9037	40.6667		18.9861	22.5162	8.7046		54.2174	26.3454	667.5		32.5716	45.0238	49.4845		32.6333	28.8646	22.6154		33.9015	84.625	533
20.3846	21.0008	25.8566		16.6991	8.24286	15.3053		25.8667	28.9372	40.7083		35.6969	31.4697	28.5928		30.6618	33.0451	13.1907		41.4921	34.9821	82.7
20.1799	29.6238	20.6129		10.5341	12.3778	10.2827		24.8154	66.75	32.3759		27.2109	25.1895	45.9779		19.5155	16.8617	23.9474		39.25	36.9667	374.893
51.3669	86.75	33.2032		92.9773	50.4375	17.7778		50.322	210.806	59.6318		34.8589	83.317	34.5679		19.8155	53.9167	19.9119		61.9554	222.643	65.7411
17.7046	16.7489	21.7223		16.75	12.7917	14.1763		18.8235	19.9031	32.8824		26.1714	25.5101	45.0417		18.9526	12.4265	17.3426		34.8971	64.35	472.833
26.0947	26.1533	76.6719		17.0444	24.6889	33.0667		36.6619	26.9415	295.667		36.8581	42.6298	46.4156		55.35	26.565	20.9145		27.0462	91.5889	382.182
22.2954	24.3801	127.052		19.8762	16.1872	66.2375		24.9	36.025	397		40.0363	65.2206	44.1079		37.1806	52.4808	26.5		45.4263	83.5079	95.4643
22.4067	87.7946	29.3996		12.5833	32	15.8298		33.1833	268.917	50.6429		28.4356	32.9775	77.6688		18.4318	21.8167	45.9192		47.4269	55.0864	226.917
23.9336	46.9237	43.4752		13.1125	35.2576	18.0377		34.9316	61.6932	229.25		25.9761	95.4776	55.9375		24.3168	62.4583	26.3424		32.175	177.533	261.25
21.8036	25.2394	46.1941		13.3303	15.1958	18.4559		33.1364	32.9405	266.5		47.0263	35.9103	34.8009		42.2143	20.6036	21.6197		62.5714	181.155	62.7909
20.396	26.7318	37.694		21.1536	22.9661	21.4062		21.8426	31.8669	70.1154		33.1567	45.9417	40.5426		22.3709	28.4549	24.0981		55.5312	90.8231	78.1389
43.003	19.9474	60.7288		26.3333	14.7566	24.9866		76.6429	25.0646	285.917		38.7225	31.585	27.0079		22.8556	19.053	15.4031		86.5	61.2094	78.9704
35.4532	39.75	22.3542		31.9712	26.1917	17.2533		42.7794	63.65	28.3863		36.8523	43.9007	49.9848		32.0114	21.2139	21.4524		42.5294	131.8	441.75
		41.9773				26.1236				67.4931		42.7222	57.6812	43.0962		23.2833	36.4375	23.1488		121.542	121.75	118.733

## Sheet: Panel C
Female Total Bout #				Female Day Bout #				Female Night Bout #				Male Total Bout #				Male Day Bout #				Male Night Bout #
iso31	bchs/+	bchs/bchs		iso31	bchs/+	bchs/bchs		iso31	bchs/+	bchs/bchs		iso31	bchs/+	bchs/bchs		iso31	bchs/+	bchs/bchs		iso31	bchs/+	bchs/bchs
36.3333	32	38		20.3333	17	20.3333		16.3333	15	18		29.6667	24	35.3333		17.6667	16.3333	26		12	7.66667	9.33333
21.3333	42.6667	28.6667		13.6667	18.6667	20.6667		7.66667	24	8		26.3333	33	29.3333		16.6667	24.3333	24.3333		9.66667	8.66667	5
38.3333	25.6667	38.3333		23.6667	16.3333	19.6667		14.6667	9.33333	19		30	31.3333	31		19.6667	21.6667	25		10.3333	9.66667	6
37.6667	37	30.3333		21.3333	24	16.6667		16.3333	13	13.6667		25.6667	21.3333	27.3333		15.3333	16.6667	21.6667		10.3333	4.66667	5.66667
41	41.3333	38		22	19	22		19	22.3333	16		33	22.3333	29.3333		19.3333	15.6667	20.3333		13.6667	6.66667	9
41	32	34.6667		19.3333	12.3333	23		21.6667	19.6667	11.6667		31.6667	29	25.3333		20	21.3333	22.3333		11.6667	7.66667	3
36.3333	26.6667	31.3333		19.3333	13.6667	17.6667		17	13	13.6667		30	36	29		19.3333	18	26.3333		10.6667	18	2.66667
34.6667	28.6667	34.3333		17.6667	13	19.3333		17	15.6667	15.3333		37.3333	27.6667	32		22.3333	17.3333	24		15	10.3333	8
20.6667	32	40		5.33333	15.6667	20.6667		15.3333	16.3333	19.3333		31.6667	34.6667	31.6667		20	23.3333	18		11.6667	11.3333	13.6667
33	31.3333	36.6667		13	16.3333	17.6667		20	15	19		37.3333	17.6667	29		22	11	18.3333		15.3333	6.66667	10.6667
44.6667	32.6667	26		20	12	13.3333		24.6667	20.6667	12.6667		33	16.6667	37		19	7.66667	21.6667		14	9	15.6667
28.3333	32.3333	33.3333		18.3333	21.3333	20.6667		10	11	12.6667		22.3333	36.3333	34.6667		15.6667	25.3333	23.3333		6.66667	11	11.3333
40.3333	37.6667	34		21	18.6667	19.6667		19.3333	19	14.3333		23.3333	29.3333	38.6667		9.33333	20.6667	22.3333		14	8.66667	16.6667
39	29	31		17.3333	23.3333	15.6667		21.6667	6	15.3333		34.3333	29.6667	23.6667		19.3333	21	18.6667		15	8.66667	5
39.3333	30.3333	38		23.6667	15	22		15.6667	15.3333	16		35.3333	25.6667	24.6667		17.6667	16	21.3333		17.6667	9.66667	3.66667
35	19	29.6667		20.6667	5.66667	17.3333		14.3333	13.3333	12.6667		38.6667	24.6667	22.3333		23.3333	20	18.3333		15.3333	4.66667	4
29.5	24	31		12	18	24		17.5	6	7		16.5	28.5	34.5		5.5	16	18.5		11	12.5	16
41.5	39	30.5		22.5	25	21.5		19	14	9		9.5	20	25		7	15.5	19.5		2.5	4.5	5.5
30	33.5	21		15	12.5	20		15	21	1		32	26	25.5		15	17	24		17	9	1.5
45.5	24.5	29.5		25.5	8.5	17		20	16	12.5		25	31.5	33		13.5	12.5	25		11.5	19	8
21.5	25.5	34		7.5	16.5	17.5		14	9	16.5		34.5	39.5	27		20.5	23	19.5		14	16.5	7.5
18	13.5	28.5		6.5	8	18		11.5	5.5	10.5		29.5	15	31.5		18.5	10.5	20.5		11	4.5	11
36	42	42		18	18.5	25		18	23.5	17		32.5	40	24.5		17	30	22.5		15.5	10	2
29.5	28	15		16.5	9.5	13		13.5	18.5	2.5		29.5	25	21.5		10.5	18	15.5		19	7	6
40.5	42.5	11		20.5	25	6.5		20	17.5	4.5		25.5	19.5	25.5		13	11.5	19		12.5	8	6.5
25.5	11	26.5		13	8.5	15.5		12.5	2.5	11		32.5	32	15.5		21	22	11.5		11.5	10.5	4
20	19.5	23		9	10	19		11	9.5	4		34.5	12.5	24		18.5	8.5	21.5		16	4	3
26	28	25.5		15	12	22.5		11	16	3		19.5	35	33.5		10	23.5	23		9.5	11.5	10.5
39.5	33	28.5		17	15	18		22.5	18	10.5		32	25	28.5		20	16	20.5		12	9	8.5
22.5	38	17.5		15	17.5	15		7.5	20.5	2.5		28.5	35	41.5		19	24	25.5		9.5	11	16
25	27.5	42		12.5	17.5	21.5		12.5	10	20.5		26.5	24.5	23		13.5	19.5	20.5		13	5	2.5
		22				13.5				8.5		24	18	26		16.5	12	20.5		7.5	6	5.5

## Sheet: Panel D
Female ZT12 Latency				Male ZT12 Latency
iso31	bchs/+	bchs/bchs		iso31	bchs/+	bchs/bchs
23.3333	51.6667	13.3333		62	18.3333	17.3333
34.6667	13.6667	20		33	26.6667	14.6667
19.6667	55	10		76	15	14
29.3333	21.3333	31		16.3333	12.3333	13
16.3333	20.3333	32		14.6667	17	11.6667
48	61.3333	14.6667		22.3333	14.3333	25.3333
71	108	10.3333		19.6667	31.3333	8.33333
58.6667	47.6667	10.3333		84.3333	14.3333	8.33333
115	28.6667	12.6667		33	15	14.6667
45	12.6667	17.3333		33.3333	14	28
33.3333	39.6667	8.33333		36.6667	15.3333	12
76	34.6667	17.6667		24.6667	17	13.3333
18	34	27		27	12	5.33333
102.667	7	16.3333		57	18.3333	12.3333
15.6667	56.6667	47.3333		16	18.3333	7.66667
65.6667	112.333	15		40.6667	15.3333	15
19.5	13	13		21.5	18.5	18
62.5	20.5	13.5		17.5	26.5	14.5
43	12.5	53.5		22.5	12.5	9
13.5	111.5	35		85	16	15
79.5	39.5	58		19	20	18.5
43	13	18.5		18	10.5	13
79	49.5	16.5		25.5	18.5	9.5
17.5	70	7.5		33.5	32.5	13
24.5	23	10		28.5	18.5	16.5
34.5	13.5	42.5		15	10.5	16.5
101	19	11.5		49	17	9
37	67	7		34.5	20	12
32	50.5	10		22.5	19	8
47	71	17		17	19.5	14
42	21.5	41		54	24	9.5
		14		39	22	33

## Sheet: Panel E
Female AI				Male AI
iso31	bchs/+	bchs/bchs		iso31	bchs/+	bchs/bchs
1.87822	1.97424	1.87505		3.28597	2.41891	2.40575
1.69007	2.34516	2.58451		4.48791	2.48413	2.58511
2.02125	1.4515	2.04853		3.17118	2.20532	3.20593
1.93732	2.11391	1.92668		2.73698	2.3722	3.17492
1.58704	1.45959	1.927		2.33608	2.84762	2.74129
2.29886	1.83092	1.94634		2.85008	2.23872	2.82454
2.713	1.53	2.54145		2.48304	2.59784	2.64798
2.11747	1.95035	1.53878		2.57583	2.70817	1.83329
1.94972	1.80009	2.20317		3.19302	2.79115	2.33443
2.01465	1.9883	2.11446		2.6933	2.3093	3.62757
1.80483	1.93472	1.75289		3.37255	2.86623	2.32145
1.88409	1.95708	2.29889		3.29268	2.26101	2.99361
1.56452	1.80688	2.24007		2.96493	2.38704	1.99463
1.97952	1.56893	2.35843		2.49699	1.95076	2.4124
2.01657	1.92844	2.27802		2.65249	2.99378	3.268
1.60239	2.19916	2.08072		2.65054	4.17625	2.28387
1.71837	2.46169	1.91239		2.37668	2.29568	2.07577
1.93405	1.78858	2.14534		1.70902	2.5819	2.23051
1.26153	1.97391	2.07626		2.37859	3.68306	2.2412
1.61942	1.52978	1.98328		2.41004	2.71909	1.98687
1.73417	1.69992	1.90128		1.8045	3.14179	3.0502
2.80769	1.7669	1.79125		2.72535	2.06615	3.22021
2.98439	2.74617	2.17969		2.27682	2.16799	1.87124
1.41	1.80439	1.44185		3.50694	2.11311	1.67094
1.52642	1.40413	1.59217		2.30574	1.39286	2.21004
1.46763	1.79604	2.58108		2.02992	2.09809	1.67577
1.74534	2.43736	1.68702		2.75345	2.93367	1.98318
1.81927	1.82912	1.36645		2.71568	1.63062	1.94384
2.12265	2.30919	1.86614		2.90774	2.37272	2.68179
2.41423	1.81341	2.48959		2.19399	2.26027	2.44742
1.72945	2.49534	1.68957		2.60991	2.30471	2.33705
		1.99798		3.01376	3.14258	1.86176

## Sheet: Panel F
AI
aus/+	bchs/+	bchs/+;aus/+
1.35122	1.97424	2.89922
2.16113	2.34516	1.71023
2.30525	1.4515	2.01972
2.10867	2.11391	1.89555
1.5044	1.45959	1.97645
1.86662	1.83092	1.98021
1.37196	1.53	2.3151
1.65057	1.95035	1.92758
2.15445	1.80009	2.0741
2.01563	1.9883	2.56841
1.73895	1.93472	1.7177
1.96001	1.95708	1.93602
1.60871	1.80688	1.58742
1.63829	1.56893	1.84462
2.17706	1.92844	2.13309
2.18279	2.19916	1.93489
1.3736	2.46169	2.07898
1.73261	1.78858	2.03187
1.05015	1.97391	1.66689
1.42087	1.52978	2.26546
1.74779	1.69992	1.71677
1.53736	1.7669	1.80893
1.76242	2.74617	2.34431
1.79823	1.80439	1.78592
1.28337	1.40413	2.17103
1.50825	1.79604	1.83785
1.47973	2.43736	1.94758
1.34678	1.82912	1.33505
1.35904	2.30919	1.39079
1.83277	1.81341	1.85603
1.29111	2.49534	1.87745
1.39268		1.73576
