# Supplementary material for: Short and long sleeping mutants reveal links between sleep and macroautophagy
Source: eLife. 2021 Jun 4;10:e64140. doi: 10.7554/eLife.64140 (PMC8177895; doi:10.7554/eLife.64140)
Supplement: Figure 6—figure supplement 2—source data 1. [file elife-64140-fig12-data12.xlsx]

## Sheet: Panel A
Total Sleep
elavGal4/+;dcr/+	uas-atg5 RNAi#1/+	elav>dcr;RNAi
671.167	840.333	784.667
778.333	865	696.5
891.667	894	964.167
944.833	838.667	925.833
836.333	1085.5	794.833
900.5	710.5	663
738.667	970.333	711.5
945.333	882.833	871
589.833	798	717.833
895.667	842.167	656
899.167	1119.5	894
891.667	959.833	636.167
665.667	932.833	715.333
940.167	1093	799.833
1027.17	791.167	797.667
825.333	789.333	953
	976.667
	925.5	701.333
	918.667	958.667
	917	875.667
	856	881.5
	942.667
	912.333
	943.833
	806.167

## Sheet: Panel B
Total Sleep
elavGal4/+;dcr/+	uas-atg7 RNAi#1/+	elav>dcr;RNAi
916.833	1013.67	560
806.667	542	788.833
893.333	895.667	637.833
944.833	990.167	617.833
954.5	712	407
854.667	900.667	658.167
826.833	845.167	781.833
950.833	823.5	913.167
891.5	1077.17	681.333
802.833	837.5	351.667
951.5	819.167	649.5
889.5	1032.33	797.167
710.333	977	528.167
730	882.5	693.667
1002.5	935.833	1058.17
723.167	978.5	801.333

## Sheet: Panel C
Activity Index
elavGal4/+;aus/aus	uas-atg5 RNAi#1/+;aus/aus	elav>RNAi;aus/aus
0.958528	1.67381	1.50311
1.09502	2.34713	1.51376
1.63696	1.32233	1.1858
0.986405	1.74987	1.87265
1.10785	1.70652	1.76816
1.02268	1.78654	1.24835
0.843997	1.47548	1.8973
1.21714	1.95601	1.3283
0.935946	1.82211	1.54237
0.968375	1.73874	1.52091
1.13842	1.27956	1.65823
1.14741	1.18015	1.04151
1.54891	2.67978	1.29269
0.785407	2.05007	1.68673
1.24451	1.69368	1.44155
1.32552	1.50629	1.24836
1.13448	1.15445	2.16588
1.09719	1.28545	1.08266
0.946966	1.15695	1.20983
0.766639	1.11445	1.65774
1.76017	1.23937	1.38715
1.08919	1.38122	1.11367
1.61553	1.35382	1.30134
0.897694	1.15034	1.10878
1.2495	1.10313	1.16788
1.13823	0.835261	1.44762
0.960939	1.85446	1.1953
0.964743	1.15304	1.07835
1.00054	1.10871	0.786502
1.76409	1.39152	1.25885
1.51598	1.35799	1.08782
1.19911	1.42817	1.39236
1.09296	1.27337	0.956673
2.56573	1.32138	1.30462
0.947933	1.26503	1.50459
0.98428	1.45971	1.28409
1.28153	0.961957	0.811089
1.14747	1.11379	1.59438
1.12409	1.1767	1.13008
1.38889	1.24327	1.22955
1.33275	1.32436	1.10251
1.90545	1.20806	0.816193
1.72282	1.22496	1.15952
1.28479	1.03231	1.16634
1.11037	1.17798	1.40775
1.19879	1.22806	1.16919
1.48945		1.16734
1.15095		0.869831
1.28338		1.15951
0.922682		2.21685
1.02779
1.25471
1.6408
1.50766

## Sheet: Panel D
Activity Index
elavGal4/+;aus/aus	uas-atg7 RNAi#1/+;aus/aus	elav>RNAi;aus/aus
0.958528	2.12196	1.22778
1.09502	1.96382	1.10511
1.63696	1.69655	0.637376
0.986405	2.22595	1.0002
1.10785	2.36822	1.0966
1.02268	2.58469	1.03032
0.843997	1.74557	1.25533
1.21714	2.34967	1.11443
0.935946	1.7679	1.75242
0.968375	1.77147	1.23709
1.13842	1.38808	1.06369
1.14741	1.78976	0.873044
1.54891	1.61466	1.17914
0.785407	1.91078	2.55393
1.24451	1.63702	1.00887
1.32552	2.2847	1.39451
1.13448	1.18735	1.18092
1.09719	1.55135	1.64487
0.946966	1.69742	1.42869
0.766639	2.4498	0.98047
1.76017	1.73141	1.00227
1.08919	1.43794	1.23343
1.61553	1.65707	1.05965
0.897694	1.5239	1.44345
1.2495	2.4307	1.13671
1.13823	2.16874	1.044
0.960939	1.68684	1.37428
0.964743	0.795249	1.0668
1.00054	1.14979	1.31023
1.76409	1.82671	1.58169
1.51598	1.02373	1.19435
1.19911	1.09168
1.09296	1.8482
2.56573	1.86469
0.947933	1.79659
0.98428	1.71679
1.28153	1.61474
1.14747	1.97733
1.12409	1.71877
1.38889	1.97524
1.33275	1.94044
1.90545	1.23304
1.72282	1.32803
1.28479	1.15886
1.11037	1.51196
1.19879	2.26234
1.48945
1.15095
1.28338
0.922682
1.02779
1.25471
1.6408
1.50766

## Sheet: Panel E
Total Sleep
elav>uas-atg5 RNAi#1	elavGal4/+	elavGal4/+;aus/+	elav>uas-atg5 RNAi#1;aus/+
573	653	614	578
578	585	610	575
568	413	646	666
565	423	586	617
617	616	548	615
603	595	350	666
584	621	264	621
570	620	488	657
650	598	594	625
612	612	530	645
528	608	480	583
616	636	515	642
666	426	442	562
512	648	518	657
482	593	441	658
603	441	659	612
600	516	560	600
651	637	630	654
415	577	664	658
568	576	513	663
599	620	496	628
611	612	390	585
616	610	503	646
656	637	510	647
654	599	431	593
719	478	484	579
652	661	452	638
612	622	492	659
637	639	488	609
565	582	537	663
659	693	639	619
578	639	618	637
652	476	714	641
528	530	584	643
643	635	486	583
559	619	505	651
633	620	239	678
497	570	485	490
603	587	509	623
616	668	497	572
546	650	432	657
602	621	415	606
666	580	472	641
664	659	551	617
662	631	550	669
556	585	624	661
613	618	477	625
611	670	697	624
637	648	639	661
616	538	580	668
634	479	463	479
524	639	302	564
604	611	462	644
586	609	477	649
574	521	558	553
587	675	498	653
571	666	470	615
622	661	520	666
516	637	481	674
616	633	596	634
665	640	631	632
613	652	522	651
645	645	691	648
649	634	666	571
641	658	533	583
613	660	563
647	567	411
631	625	462
653	655	478
540	627	565
597	657	552
620	595	500
631	607	479
592	667	560
608	630	585
632	617
610	523
625	678
663	664
653	641
653	615
646	585
575	670
524	655
638	595
602
635
528
632
657
657
568

## Sheet: Panel F
Total Sleep
elav>uas-atg7 RNAi#1	elavGal4/+	elavGal4/+;aus/+	elav>uas-atg7 RNAi#1;aus/+
634	653	614	667
577	585	610	553
629	413	646	619
661	423	586	560
626	616	548	610
664	595	350	621
618	621	264	606
574	620	488	663
517	598	594	593
629	612	530	619
604	608	480	663
641	636	515	548
594	426	442	586
649	648	518	539
620	593	441	664
637	441	659	609
683	516	560	653
563	637	630	574
578	577	664	651
628	576	513	650
667	620	496	484
628	612	390	679
667	610	503	545
574	637	510	504
644	599	431	631
646	478	484	621
562	661	452	629
653	622	492	345
640	639	488	626
610	582	537	612
649	693	639	626
610	639	618	589
651	476	714	600
600	530	584	650
657	635	486	390
671	619	505
641	620	239
665	570	485
679	587	509
646	668	497
619	650	432
668	621	415
649	580	472
533	659	551
665	631	550
588	585	624
633	618	477
664	670	697
647	648	639
662	538	580
612	479	463
645	639	302
642	611	462
624	609	477
644	521	558
621	675	498
662	666	470
680	661	520
668	637	481
656	633	596
674	640	631
624	652	522
656	645	691
617	634	666
615	658	533
650	660	563
647	567	411
646	625	462
665	655	478
627	627	565
628	657	552
506	595	500
639	607	479
650	667	560
647	630	585
663	617
667	523
661	678
600	664
682	641
642	615
652	585
656	670
555	655
653	595
664
664
664
658
669
559
664
632
609
664
