# Supplementary material for: Short and long sleeping mutants reveal links between sleep and macroautophagy
Source: eLife. 2021 Jun 4;10:e64140. doi: 10.7554/eLife.64140 (PMC8177895; doi:10.7554/eLife.64140)
Supplement: Figure 6—source data 1. [file elife-64140-fig6-data1.xlsx]

## Sheet: Panel 6A
Total Sleep				Day Sleep				Night Sleep
iso31	bchs/+	bchs/bchs		iso31	bchs/+	bchs/bchs		iso31	bchs/+	bchs/bchs
676	698	920.667		242	257.333	353.333		434	440.667	567.333
788.333	759	1059		201.667	235.667	386.333		586.667	523.333	672.667
896	783.333	843		286.667	246.333	302.667		609.333	537	540.333
881	864	899		339	292	306.667		542	572	592.333
677.667	647	913		213	186.333	318		464.667	460.667	595
709	512.667	1026.67		226.667	124.333	389		482.333	388.333	637.667
710.333	612	902.667		230	171	240		480.333	441	662.667
731.333	758.333	819.667		280	211.667	252.667		451.333	546.667	567
433	708.667	926.333		41.6667	140.667	317.333		391.333	568	609
602.667	1058	811.333		113.667	478.333	252		489	579.667	559.333
728.333	623	926.667		251.333	101.667	297.667		477	521.333	629
746.667	860.333	842.333		200.667	253.333	291		546	607	551.333
686.333	805.667	946.333		156.667	275.333	337.667		529.667	530.333	608.667
562.333	963.333	940.667		185.667	271	299.667		376.667	692.333	641
845.333	857.667	693.333		276	326	245.667		569.333	531.667	447.667
667.667	374.333	784.333		193.333	38.3333	205.333		474.333	336	579
858.5	931.5	1038		378	293.5	395		480.5	638	643
789	877	950.5		247.5	337.5	279.5		541.5	539.5	671
836.5	827.5	840		269.5	276.5	172.5		567	551	667.5
906	508	765.5		424	71.5	260		482	436.5	505.5
409	728	693.5		66	203	180.5		343	525	513
881.5	1084.5	946.5		305	403.5	320		576.5	681	626.5
637.5	705	911.5		301.5	238	352.5		336	467	559
760.5	733	1130.5		285.5	233.5	420		475	499.5	710.5
897	1011	1092		399	394	404.5		498	617	687.5
558	892	754.5		162	247	243.5		396	645	511
472.5	913	996.5		117.5	349.5	329		355	563.5	667.5
562.5	690.5	1093		198	181	382.5		364.5	509.5	710.5
804.5	878	1073.5		341	337.5	382		463.5	540.5	691.5
967.5	758	1061		395	253	372		572.5	505	689
871	1083.5	919		398	447	370.5		473	636.5	548.5
		923.5				351.5				572

## Sheet: Panel 6B
Total Sleep				Day Sleep				Night Sleep
aus/+	bchs/+	bchs/+;aus/+		aus/+	bchs/+	bchs/+;aus/+		aus/+	bchs/+	bchs/+;aus/+
284.667	698	746		67	257.333	193.667		217.667	440.667	552.333
726.333	759	746.333		275	235.667	113.667		451.333	523.333	632.667
631.667	783.333	858.667		201.333	246.333	243.333		430.333	537	615.333
421.667	864	552		119.667	292	174.333		302	572	377.667
422	647	690		89	186.333	196.333		333	460.667	493.667
478.333	512.667	767.333		124.333	124.333	298		354	388.333	469.333
467	612	757.333		55.6667	171	209		411.333	441	548.333
442.667	758.333	856.667		199.333	211.667	326		243.333	546.667	530.667
716	708.667	879.333		254	140.667	295.333		462	568	584
746.667	1058	897		260.667	478.333	316		486	579.667	581
538.667	623	665		144.667	101.667	170.333		394	521.333	494.667
335	860.333	867.333		77.6667	253.333	275		257.333	607	592.333
419	805.667	609.333		89	275.333	83.3333		330	530.333	526
904.333	963.333	950		353.667	271	313		550.667	692.333	637
529.333	857.667	561.333		211	326	131.667		318.333	531.667	429.667
552.667	374.333	925.333		163.333	38.3333	365.333		389.333	336	560
575.5	931.5	919		155	293.5	334		420.5	638	585
811.5	877	879.5		272.5	337.5	328.5		539	539.5	551
638.5	827.5	815		96	276.5	318		542.5	551	497
361	508	1017		147	71.5	392		214	436.5	625
745	728	803.5		287.5	203	293.5		457.5	525	510
813.5	1084.5	769		234.5	403.5	286.5		579	681	482.5
425	705	730.5		285.5	238	411.5		139.5	467	319
450.5	733	756		215	233.5	285.5		235.5	499.5	470.5
436	1011	996.5		105.5	394	400.5		330.5	617	596
601.5	892	723.5		234	247	323.5		367.5	645	400
523	913	740		147	349.5	291.5		376	563.5	448.5
1009.5	690.5	478.5		386	181	130		623.5	509.5	348.5
714	878	908		231.5	337.5	380.5		482.5	540.5	527.5
741	758	981		222.5	253	346.5		518.5	505	634.5
393	1083.5	1096		219	447	417.5		174	636.5	678.5
803		997		325		358		478		639

## Sheet: Panel 6C
Total Sleep				Day Sleep				Night Sleep
elavGal4/+;aus/aus	uas-atg5 RNAi#1/+;aus/aus	elav>RNAi;aus/aus		elavGal4/+;aus/aus	uas-atg5 RNAi#1/+;aus/aus	elav>RNAi;aus/aus		elavGal4/+;aus/aus	uas-atg5 RNAi#1/+;aus/aus	elav>RNAi;aus/aus
314	40.1667	463.167		230.667	36	67.8333		83.3333	4.16667	395.333
160	435.167	172.333		17	87.8333	15.3333		143	347.333	157
388.667	98.8333	85		20	17	49.1667		368.667	81.8333	35.8333
530.167	82.5	326.167		201.667	34.5	53.8333		328.5	48	272.333
288.5	79.1667	379.5		20.8333	42.3333	6.5		267.667	36.8333	373
145.333	58.3333	376.333		38.3333	51.1667	110.167		107	7.16667	266.167
636.667	136.833	290		290.667	41.6667	103		346	95.1667	187
585.667	51.5	199.833		343.5	6	74.8333		242.167	45.5	125
374	436.5	379.667		175.667	129.667	74.1667		198.333	306.833	305.5
508.833	131.667	205.5		302.167	11.6667	20.1667		206.667	120	185.333
160.833	150.167	297.833		77	43	117.333		83.8333	107.167	180.5
151.5	48	805.833		76.1667	18.3333	287.5		75.3333	29.6667	518.333
263.833	247.333	411		34.8333	39	97.1667		229	208.333	313.833
711.667	239.5	139.5		603.833	70.8333	69.6667		107.833	168.667	69.8333
162.5	335	278.167		102.667	94.3333	39		59.8333	240.667	239.167
494.833	507.333	143.833		191.5	180.833	61.6667		303.333	326.5	82.1667
429	251.333	519.667		344	80.6667	107.167		85	170.667	412.5
200.333	398.167	706.833		71.3333	116.667	209.167		129	281.5	497.667
205	362.667	121.5		125.5	57	38.5		79.5	305.667	83
793.667	489.5	573		405.833	205.667	119		387.833	283.833	454
22.1667	193.667	549.667		15.3333	72.6667	233		6.83333	121	316.667
137.333	387.333	779.667		40	183.167	172.5		97.3333	204.167	607.167
42.5	271.333	465.333		21.6667	49.3333	55.8333		20.8333	222	409.5
390.5	506.167	571		92.3333	127.667	88.8333		298.167	378.5	482.167
182.333	364.167	633.167		4.33333	151.5	146.833		178	212.667	486.333
122.5	432	714		19.1667	180.667	159.333		103.333	251.333	554.667
163.167	21.5	561.833		86.8333	8	85		76.3333	13.5	476.833
218.167	230	319.5		114.167	133.667	68.3333		104	96.3333	251.167
805.833	335.5	1001.5		368	156.833	462.333		437.833	178.667	539.167
128.667	255.333	600.833		32.8333	50.5	39		95.8333	204.833	561.833
33.8333	297.667	308.167		28.8333	82.5	17.8333		5	215.167	290.333
789	322.167	654.5		215.833	115.167	120.833		573.167	207	533.667
496.667	239.167	673.333		247.333	58.1667	213		249.333	181	460.333
275.5	483.333	634.667		135.167	131.667	83.5		140.333	351.667	551.167
634.167	217.667	674.833		418.333	108	189.667		215.833	109.667	485.167
434.667	457.833	697.5		52.8333	195.333	139		381.833	262.5	558.5
725.667	647.333	541.333		300.167	205.5	137.167		425.5	441.833	404.167
236.333	577	541.333		82.6667	243.167	82.5		153.667	333.833	458.833
676.5	346.667	522.5		264	139	101.5		412.5	207.667	421
391.333	242.167	607.667		164	110.667	146.667		227.333	131.5	461
523.333	312	627		223.333	68	149.333		300	244	477.667
105.833	450.833	415.333		14.1667	164.833	55.8333		91.6667	286	359.5
719.5	331.833	509.333		155.167	145.5	83.8333		564.333	186.333	425.5
366.333	548.5	716.667		270.333	229.167	276.167		96	319.333	440.5
772.167	305.167	631.833		249.667	42.8333	242.667		522.5	262.333	389.167
409	659.667	611.333		318.167	209.167	198.333		90.8333	450.5	413
725		556.5		348.167		57		376.833		499.5
132.667		257.5		108		121.5		24.6667		136
340.667		535.167		125.5		89.5		215.167		445.667
672.667		653.333		297.833		64		374.833		589.333
725				275.167				449.833
309.5				115.167				194.333
521.167				286.333				234.833
204.833				76.6667				128.167

## Sheet: Panel 6D
Total Sleep				Day Sleep				Night Sleep
elavGal4/+;aus/aus	uas-atg7 RNAi#1/+;aus/aus	elav>RNAi;aus/aus		elavGal4/+;aus/aus	uas-atg7 RNAi#1/+;aus/aus	elav>RNAi;aus/aus		elavGal4/+;aus/aus	uas-atg7 RNAi#1/+;aus/aus	elav>RNAi;aus/aus
314	55.8333	442		230.667	4	79.5		83.3333	51.8333	362.5
160	333.667	440.833		17	156	87.6667		143	177.667	353.167
388.667	267.333	829.667		20	59.3333	329.5		368.667	208	500.167
530.167	159.333	543.5		201.667	39.6667	240.833		328.5	119.667	302.667
288.5	8.6	425.167		20.8333	5.6	109.667		267.667	3	315.5
145.333	5.8	286.167		38.3333	4.8	77.3333		107	1	208.833
636.667	19.3333	378.167		290.667	6.83333	29.8333		346	12.5	348.333
585.667	111.333	365.5		343.5	26.5	43.1667		242.167	84.8333	322.333
374	119	615.667		175.667	11.5	19.8333		198.333	107.5	595.833
508.833	86.1667	599.667		302.167	10.5	169.5		206.667	75.6667	430.167
160.833	139	619.667		77	76.8333	280.167		83.8333	62.1667	339.5
151.5	27.1667	496		76.1667	11.3333	92.6667		75.3333	15.8333	403.333
263.833	40	675		34.8333	17.3333	54.1667		229	22.6667	620.833
711.667	11.3333	360.5		603.833	3.33333	54.5		107.833	8	306
162.5	154.5	309.333		102.667	14.1667	113.833		59.8333	140.333	195.5
494.833	131.667	608.5		191.5	13	64.1667		303.333	118.667	544.333
429	299.333	312.667		344	74.1667	71.3333		85	225.167	241.333
200.333	535.5	547.833		71.3333	108.333	154.167		129	427.167	393.667
205	259.667	652.333		125.5	150.833	190.5		79.5	108.833	461.833
793.667	202.333	331		405.833	25.1667	104.833		387.833	177.167	226.167
22.1667	63.6667	508.333		15.3333	29.8333	218		6.83333	33.8333	290.333
137.333	210.167	670.833		40	43.5	164.667		97.3333	166.667	506.167
42.5	215.833	753.167		21.6667	67.5	113.5		20.8333	148.333	639.667
390.5	278.833	478.167		92.3333	82.3333	177.5		298.167	196.5	300.667
182.333	7.5	209.167		4.33333	3	31.5		178	4.5	177.667
122.5	330.333	673.833		19.1667	47	175.5		103.333	283.333	498.333
163.167	266.667	225.333		86.8333	28.3333	24.3333		76.3333	238.333	201
218.167	495	407.167		114.167	193.167	151		104	301.833	256.167
805.833	460.333	293		368	182.167	15.6667		437.833	278.167	277.333
128.667	120.833	342.5		32.8333	83.1667	134.833		95.8333	37.6667	207.667
33.8333	569.5	349.833		28.8333	221	234.5		5	348.5	115.333
789	353.667			215.833	53.3333			573.167	300.333
496.667	411.667			247.333	83.8333			249.333	327.833
275.5	164.167			135.167	114.167			140.333	50
634.167	293.833			418.333	100.5			215.833	193.333
434.667	243.667			52.8333	29.8333			381.833	213.833
725.667	205.167			300.167	136.167			425.5	69
236.333	146.167			82.6667	53.8333			153.667	92.3333
676.5	274.5			264	63.5			412.5	211
391.333	386.167			164	57.5			227.333	328.667
523.333	493.833			223.333	168			300	325.833
105.833	215.667			14.1667	86.5			91.6667	129.167
719.5	188.5			155.167	82.8333			564.333	105.667
366.333	202.833			270.333	42.8333			96	160
772.167	398.333			249.667	90.5			522.5	307.833
409	24.8333			318.167	20.1667			90.8333	4.66667
725				348.167				376.833
132.667				108				24.6667
340.667				125.5				215.167
672.667				297.833				374.833
725				275.167				449.833
309.5				115.167				194.333
521.167				286.333				234.833
204.833				76.6667				128.167
