# Supplementary material for: Short and long sleeping mutants reveal links between sleep and macroautophagy
Source: eLife. 2021 Jun 4;10:e64140. doi: 10.7554/eLife.64140 (PMC8177895; doi:10.7554/eLife.64140)
Supplement: Figure 7—figure supplement 1—source data 1. [file elife-64140-fig14-data14.xlsx]

## Sheet: Panel A-E
Total Sleep				Total Sleep				Total Sleep				Total Sleep				Total Sleep
uas-dcr/+;nsybGS/+	uas-atg1 RNAi#1/+	nsyb>dcr;RNAi		uas-dcr/+;nsybGS/+	uas-atg1 RNAi#4/+	nsyb>dcr;RNAi		uas-dcr/+;nsybGS/+	uas-atg10 RNAi#3/+	nsyb>dcr;RNAi		uas-dcr/+;nsybGS/+	uas-bip RNAi#3/+	nsyb>dcr;RNAi		uas-dcr/+;nsybGS/+	uas-daor RNAi#1/+	nsyb>dcr;RNAi
664	871.5	1121		504.5	932.5	1103.5		610.5	1030	1066.5		811	950.5	1322.5		610.5	962	1139
747	853.5	1269.5		597	728.5	1206.5		329	930	1195.5		487	989.5	1288		329	939	1173
917	881.5	1240		794	658.5	1053.5		513	633.5	1023.5		639	915	1290		513	812.5	1210
677	853	1012.5		467.5	878.5	1268		649.5	1091.5	1003.5		575	911.5	1350.5		649.5	1029	1094
639	884.5	657.5		908	904.5	1132.5		509.5	726	788		889	906.5	1046		509.5	797.5	1034
724.5	955	1348		651	934	1017		481.5	1018.5	1028		790	1087.5	1325		481.5	1060.5	1184.5
785.5	1033	973		832	859.5	1294		827	1011	1042.5		616	758	1109		827	975.5	1285.5
720.5	805	963.5		810	877	1161		669.5	802	1125.5		992	870.5	948		669.5	999.5	1150
1146	795	828.5		754.5	1008	1233		699.5	1098	1150		557	967.5	1049.5		699.5	992.5	1306
920	948.5	1169		419	728	893.5		530	744	979		852.5	915.5	1376.5		530	759	903.5
1030.5	949	1203.5		380	1007	1240.5		454.5	1135	1157.5		538.5	859	1111.5		454.5	688.5	1219
500.5	910	1134.5		570.5	656.5	1254		302.5	559.5	1207		814	882	1206.5		302.5	1082	841
881.5	972	1237		379	823.5	998.5		547	467	1188.5		659	1031	991		547	1067.5	1141
659	901.5	1053		576	713	1288.5		595.5	616	1084		705.5	947.5	1103		595.5	963.5	1173
1127.5	519.5	1083		664	711.5	1173		290.5	913	762.5		820.5	960	1135		290.5	944.5	890.5
624.5	1043.5	888.5		798	961.5	1057		633	765	872.5		986.5	956	1202		633	1053.5	1172
917.5	1026.5	1223		624.5	498	1147.5		634.5	740.5	996.5		857	1046.5	1177		561.5	881	1065
482.5	799.5	1207		917.5	737.5	971.5		601.5	875.5	999		1209.5	970	1248		713.5	1052.5	974.5
508.5	935	920.5		482.5	967	973		636	1026	550		967.5	1074			823.5	996	943.5
447	694	976		508.5	575.5	827		455.5	610	792		826.5	862			955.5	890.5	1048
900	741.5			447	803	1371.5		717.5	630	891.5		1280.5	1095			811	954.5	959.5
696.5	1059			900	717.5			471	733	795.5		1024	785			1018	932.5	1075.5
817.5	1071			696.5	948			547.5	1003.5	918.5		735	867.5			509.5	968.5
539	810			817.5	796.5			710.5	773.5	700.5		800	1031.5			1081.5	1055
567	915			539	563			621	696	710.5		971	1242			935	894
828.5	825.5			567	867			615.5	491.5	645		1125.5	972.5			784
882.5	847.5			828.5	1025			720.5	801.5	568		727	963.5			874.5
817.5	969.5			882.5	870			727	979	893		1064.5	932.5			606.5
689.5				817.5	931			189	863.5	547		935	1043.5			907.5
554				689.5	688.5			597.5	762.5	682.5		656				937
622				554				466	868			1040				795
				622				765

## Sheet: Panel F-P
Total Sleep				Total Sleep				Total Sleep				Total Sleep				Total Sleep				Total Sleep				Total Sleep				Total Sleep				Total Sleep				Total Sleep				Total Sleep
uas-dcr/+;actinGS/+	uas-aduk RNAi#3/+	actin>dcr;RNAi		uas-dcr/+;actinGS/+	uas-atf6 RNAi#1/+	actin>dcr;RNAi		uas-dcr/+;actinGS/+	uas-atg7 RNAi#1/+	actin>dcr;RNAi		uas-dcr/+;actinGS/+	uas-atg8b RNAi#1/+	actin>dcr;RNAi		uas-dcr/+;actinGS/+	uas-atg8b RNAi#2/+	actin>dcr;RNAi		uas-dcr/+;actinGS/+	uas-atg12 RNAi#2/+	actin>dcr;RNAi		uas-dcr/+;actinGS/+	uas-atg14 RNAi#3/+	actin>dcr;RNAi		uas-dcr/+;actinGS/+	uas-daor RNAi#1/+	actin>dcr;RNAi		uas-dcr/+;actinGS/+	uas-dor RNAi#2/+	actin>dcr;RNAi		uas-dcr/+;actinGS/+	uas-dram RNAi#2/+	actin>dcr;RNAi		uas-dcr/+;actinGS/+	uas-wacky RNAi#2/+	actin>dcr;RNAi
827	756	1139.5		827	750	1158		1049.5	1048.5	1258		902	1050	1260		902	790.5	1109		902	1025	1099.5		902	843.5	910		559	962	1104.5		827	478	1080.5		827	856.5	871		912.5	1131.5	1333
510	769	1139		510	807	1012		674.5	842	1215		427	912.5	1179.5		427	780.5	854.5		427	1032.5	1106.5		427	826.5	1033		988.5	939	1172.5		510	888	1278		510	836.5	1145		670.5	956.5	1050.5
648	907	1088		648	1021	774.5		736	978	1072		626.5	1060.5	1133.5		626.5	987.5	1151		626.5	953.5	1048.5		626.5	734.5	1115		802	812.5	1234.5		648	731	1152.5		648	813	1026		868.5	729.5	1208
951.5	872.5	984.5		951.5	1010	1054.5		427.5	914	1104.5		854	975	1329		854	921.5	1229		854	925.5	1163		854	917.5	1034		223.5	1029	924.5		951.5	871.5	1332		951.5	949.5	969.5		868	937	994
746	955	992.5		746	814	1219.5		898.5	1053	988		881.5	881	1232.5		881.5	883	1278		881.5	960	1116		881.5	725	948.5		346.5	797.5	1237		746	879.5	1117		746	807	1140.5		813.5	833	1212
1010	854	975.5		1010	752	1126.5		667.5	955.5	1136		725.5	891.5	1077		725.5	873.5	1092		725.5	958.5	1076.5		725.5	951	993		514.5	1060.5	1228.5		1010	946	1257		1010	966.5	852.5		743	1302	1140
252.5	952	1147		252.5	952	1013		829	946.5	1217.5		791.5	919	1216.5		791.5	787	910		791.5	1009	1122		791.5	943.5	811.5		671	975.5	1336.5		252.5	422	1355.5		252.5	821.5	1118		1082.5	854.5	1163
679.5	877	1052		679.5	861	1072		704.5	1053	1173.5		693	698.5	1073.5		693	662	979		693	1023	1165.5		693	928.5	1126		1126.5	999.5	1295		679.5	681.5	1030.5		679.5	828.5	1077		786	766	1213
743	1028	1030.5		743	806	999.5		528	1021	1192		555.5	974	1067.5		555.5	871	1130		555.5	794	1264		555.5	708.5	1048.5		738.5	992.5	1136		743	973	1185		743	993	1148.5		986	938	1314
509	945.5	1160.5		509	1048.5	1114.5		607	443	1209		609.5	907.5	1181.5		609.5	706	867.5		609.5	942.5	1057		609.5	779.5	1072		759	759			509	954.5	1244		509	873	1086.5		1104.5	877.5	1331.5
673.5	897	881.5		673.5	1090	1017.5		755	954.5	1101.5		737.5	664.5	1104		737.5	673.5	1100.5		737.5	978.5	1180.5		737.5	611	765.5		524	688.5			673.5	846.5	1224.5		673.5	954.5	1094.5		887.5	956.5	1263
535	938	1108		535	895.5	1118.5		805.5	940	1203		844	1129	1133.5		844	721	1145.5		844	904.5	1167.5		844	851	831		733	1082			535	754	1011.5		535	925	1092.5		708.5	732	1066
754	787	1040.5		754	775	1112.5		571	896.5	946.5		514	869.5	1178		514	677.5	902.5		514	998.5	1046		514	834	1033		699	1067.5			754	715.5	1168		754	1129	1036		699.5	745	1224.5
558	794.5	1022.5		558	1048.5	1208		811.5	1000	1224.5		603	898.5	1147		603	748.5	1118.5		1182.5	1038.5	1208		1182.5	976	917		1068.5	963.5			558	511.5	1199.5		558	945.5	1122		826.5	1019	1022
653	817	988.5		653	794	1131.5		640	974	1174.5		1090.5	852	1117		1090.5	860	926.5		801.5	887.5	1050.5		801.5	881	1041		621	944.5			653	876.5	985		653	984	866.5		724	958.5	1233
800.5	744	910.5		800.5	783.5	770		837	996.5	1065		905	837	1078		905	916	1073		629	713.5	923.5		629	966.5	775.5		703.5	1053.5			800.5	912	1026		800.5	836.5	857		699.5	806	1248
559	717.5	853.5		1182.5	880.5	517.5		1182.5	912	1058.5		529.5	905	1006.5		529.5	618	1076		794.5	1081.5	902		794.5	802	1089		1001	881			609.5	777	1137		886	889	1128		942.5	803.5	1241
988.5	637.5	805		801.5	826	898.5		801.5	1121.5	995.5		1031	958.5	990		1031	513	599.5		817.5	1080	1045		817.5	945.5	937.5		933.5	1052.5			882.5	900	1184		844.5	715.5	800		506.5	1001.5	1131
802	513.5	787.5		629	624.5	751.5		629	1063.5	1112.5		778.5	1001	1095.5		778.5	1082	828		572.5	966.5	974		572.5	853	932.5		1062.5	996			1055	665.5	1240.5		918	737	1165.5		136	962.5	1292
223.5	790	701		794.5	1036	831.5		794.5	1024.5	953		1020	736.5	1118.5		1020	1009	1166.5		748.5	975	1018.5		748.5	989.5	967.5		918	890.5			742	769			816	852	1059		659.5	917.5	1175
346.5	841.5	918		817.5	1031	905.5		817.5	1001	928		534.5	907.5	1211.5		534.5				392	892.5	1044		392	860.5	1007.5		988.5	954.5			717.5	711			779	798.5	1113.5		996	990
514.5	592.5	771.5		572.5	768	926		572.5	840	1048		804.5	919.5	1041		804.5				768.5	957	846.5		768.5	583	879.5		885.5	932.5			732	1112			837.5	858.5	956.5		661.5	749
671	574.5	1111.5		748.5	830.5	808.5		748.5	801	943.5		562.5	1053.5	1112.5		562.5				681	782.5	990.5		681	1001	1077		784	968.5			724	783			727.5	789	989		1084.5	1018.5
1126.5	889	524		392	977.5	800		392	1000	1057		631.5	962	1037.5		631.5				318.5	1110.5	1085.5		318.5	944.5	1008		1018.5	1055			829	983.5			862.5	966.5	938		944	967
738.5	1002	635.5		768.5	793.5	966		768.5	1039	1049		831	1036.5	1005.5		831				692	912.5	891		692	763	1020.5		849	894			814.5	1042			954.5	635.5	706		763	890
759	515	835		681	671.5	762		681	1027.5	1057.5		485	1234	861.5		485				682.5	954.5	929		682.5	811.5	1001.5		1140				594	838.5			655	742	807.5		899.5	908
524	737	707		318.5	836	919		318.5	1108	953.5		727.5	883.5	1136.5		727.5				563	923.5	894.5		563	590.5	1060.5		760				897	910			820	462	1114		945	876
733	893.5	823.5		692	927.5	758.5		692	843.5	1007		822	932.5	1146		822				899	817.5	920		899	553	991.5		786.5				365.5	811.5			576.5	966	1081		1006	927
699	891	644.5		682.5	739.5	872.5		682.5	999	1166.5		929.5	877.5	828		929.5					646.5	881.5			939.5	1213.5		1153.5				363.5	972			621	897.5	797.5		545.5	896.5
1068.5	723.5	742.5		563	787	801		563	1131.5	1045			1082	1166.5		727.5					924.5	861.5			703.5	939.5		704.5				860.5	816			960	608	1066.5		866.5	882.5
621	873.5	1321.5		899	618.5			899	1010	993			1009			822					842	810.5			800	1011.5		1060				913.5				480	587.5			887	934.5
703.5					864											929.5									694.5	1001.5														619	834
