# Supplementary material for: Short and long sleeping mutants reveal links between sleep and macroautophagy
Source: eLife. 2021 Jun 4;10:e64140. doi: 10.7554/eLife.64140 (PMC8177895; doi:10.7554/eLife.64140)
Supplement: Figure 7—figure supplement 2—source data 1. [file elife-64140-fig15-data15.xlsx]

## Sheet: Panels A-F
Total Bout Length							Total Bout #							Longest Bout							ZT12 Latency							Activity Index							Relative cDNA Level
uas-dcr/+;nsybGS/+ RU-	uas-dcr/+;nsybGS/+ RU+	uas-atg1 RNAi#1/+ RU-	uas-atg1 RNAi#1/+ RU+	nsyb>dcr;RNAi RU-	nsyb>dcr;RNAi RU+		uas-dcr/+;nsybGS/+ RU-	uas-dcr/+;nsybGS/+ RU+	uas-atg1 RNAi#1/+ RU-	uas-atg1 RNAi#1/+ RU+	nsyb>dcr;RNAi RU-	nsyb>dcr;RNAi RU+		uas-dcr/+;nsybGS/+ RU-	uas-dcr/+;nsybGS/+ RU+	uas-atg1 RNAi#1/+ RU-	uas-atg1 RNAi#1/+ RU+	nsyb>dcr;RNAi RU-	nsyb>dcr;RNAi RU+		uas-dcr/+;nsybGS/+ RU-	uas-dcr/+;nsybGS/+ RU+	uas-atg1 RNAi#1/+ RU-	uas-atg1 RNAi#1/+ RU+	nsyb>dcr;RNAi RU-	nsyb>dcr;RNAi RU+		uas-dcr/+;nsybGS/+ RU-	uas-dcr/+;nsybGS/+ RU+	uas-atg1 RNAi#1/+ RU-	uas-atg1 RNAi#1/+ RU+	nsyb>dcr;RNAi RU-	nsyb>dcr;RNAi RU+		uas-dcr/+;actinGS/+	uas-atg1 RNAi#1/+	actin>dcr;RNAi
33.8082	12.1952	30.9684	30.431	36.4296	33.8339		30.5	37.5	27	32.5	30.5	31		648	101	306	359.5	489.5	349		25	16	34.5	23	16	7.5		1.9304	1.32888	2.7281	2.05216	4.01447	3.19146		1	1.42	0.09
54.9286	32.6175	44.3043	30.6562	36.9733	17.5659		20	30.5	22.5	31	33.5	59.5		576.5	453	401	448.5	446	264.5		22	40.5	16	41.5	1	7		1.54483	1.90947	2.32175	2.36564	5.48022	4.12435		1	1.74	0.13
13.2465	21.6288	39.3386	28.1048	80.5194	31.8204		42	48	24	33	14.5	36.5		63.5	249.5	258.5	172.5	549.5	269.5		37.5	1	19	23	14.5	4		1.76591	1.56859	2.40385	2.40319	1.8104	2.45173
19.7684	19.3942	20.9165	17.116	45.5058	34.5726		39	41	32.5	44	23	35.5		106	226.5	87	73	420	279.5		20	1	71	19	14.5	11.5		1.59692	1.53264	2.28949	2.70511	1.76051	3.29121
17.2556	19.0372	21.2857	36.1875	34.789	34.767		44	41.5	21	23.5	27.5	33		161.5	229.5	67	483	699	526		11.5	9.5	164.5	46	11.5	1		2.09134	1.55369	1.59961	2.28939	4.66691	2.33295
19.5556	19.4294	28.4529	20.114	35.881	35.747		27.5	28.5	32	23	21	28		143	157.5	296	155	330.5	460		40.5	42	18	108.5	29.5	7.5		1.61094	2.24699	1.59207	2.11991	4.68196	3.96717
18.5861	38.9304	28.7466	48.0897	24.4979	40.7292		33.5	16.5	31	22	38	24		129.5	173.5	178.5	423	273	592		23.5	41.5	30.5	62	27	5		1.87851	2.53906	1.73317	1.47445	3.24084	4.44196
40.1686	40.2727	44.2232	37.3261	46.1875	40.7919		25.5	22	23.5	27.5	18	30.5		395.5	665	473.5	401	452.5	719		46.5	29.5	24	24	17.5	1		1.93766	1.84682	1.75733	1.74549	2.77368	3.61401
27.4269	39.7037	34.9461	14.7587	41.0192	52.0789		25.5	27	26.5	42.5	27	24.5		166	627	128	52.5	464	534.5		24.5	21	67.5	34.5	17	1		1.38646	1.78856	1.43254	1.91374	2.02113	2.9785
70.5952	15.0349	52.4176	37.1969	26.7951	70.7354		14.5	30.5	19	26	35.5	20.5		619	84.5	235	461.5	393	412		55	26	30	26.5	33.5	1		2.29825	1.75885	1.62797	1.89833	3.75246	3.36838
24.8382	20.0417	30.6011	37.0556	23.2841	32.2231		25	25	33	30	30.5	36.5		147	129.5	171	442.5	233	546		38.5	62.5	17	22	11	1.5		1.65334	1.60357	2.19776	2.42688	1.76299	4.50701
24.4536	26.5673	32.876	50.3583	30.9655	44.1542		38	31.5	28.5	17.5	28.5	27		192.5	231.5	266	616	248	622		17.5	57.5	50.5	56	17	6.5		1.57212	1.83643	1.75474	1.82992	2.67384	2.26024
19.5506	30.6691	26.3467	22.4382	31.8408	30.1058		42	16.5	33	40.5	29	28		217	228	192.5	189.5	218	280.5		31	57	83.5	30	23.5	4		1.1602	2.14208	1.6275	2.87993	2.33842	4.39619
68.6786	30.3444	39.5559	20.866	38.6358	46.3711		14	19	25.5	34.5	29	25		504	207.5	191	186.5	509	724.5		26.5	31	19	68	17	1		2.02357	1.67629	2.12876	3.1336	2.02979	2.61368
34.9259	28.8621	24.4064	45.303	18.4271	43.9242		22.5	30.5	42	18.5	41.5	29.5		329.5	492.5	99	455.5	119	678		29.5	32	19.5	26.5	31	2		2.22331	1.30178	2.41213	1.9307	2.7061	3.0724
42.5577	36.2413	42.7825	49.4947	23.6	32.2326		22	24	26.5	22.5	47	34		298.5	445	491.5	334	129.5	439.5		40.5	22	25.5	21	8	1		1.75624	1.31887	2.8304	1.91606	3.19316	3.34716
43.625	25.8154	37.8141	39	42.7481	34.0835		21	36	26	24	23.5	30.5		608	462	429.5	357.5	703	544.5		19	25.5	22	13.5	6	9		1.92447	1.76129	1.46983	2.21445	1.72405	2.13451
25.9813	49.5533	61.9766	33.956	37.9792	54.081		34.5	23	18	29	28	25.5		143	602.5	437	386	535	606		36.5	21.5	16	12.5	11	2.5		1.26684	1.56713	1.88496	1.76789	1.81958	3.09786
29.6627	41.8411	47.9289	45.4375	75.4487	74.642		32.5	22.5	20.5	16	11	19		508.5	467.5	274	225	695	594.5		8	1	18.5	18.5	20	1		1.71729	1.41603	1.39656	2.21436	1.97368	4.61179
39.5304	25.0174	42.1658	64.0833	30.8754	34.9559		26	40.5	24.5	13.5	35.5	32.5		520	322	274	375	495	708.5		29.5	12	18	21	8.5	9		1.2375	2.33009	1.85503	2.20023	3.60937	2.21271
36.1071	31.0368	36.675	42.107	41.3965	58.25		24	26.5	27.5	24	20	22.5		271.5	426.5	297	528	524.5	551		31.5	42	17	15	21.5	1		1.95046	1.37224	2.09276	2.64473	2.07808	4.4315
35.4409	22.5679	53.5268	37.7548	28.5321	69.76		26.5	31.5	22	25	33.5	19.5		299	227	629.5	492	324.5	606		23.5	15	13.5	31	4	1		1.99401	1.55941	1.799	2.66863	5.5943	2.87631
20.3988	37.0391	29.1528	50.3699	56.137	48.6889		33	27.5	33	18.5	21	26.5		288.5	566.5	170.5	250.5	683.5	697		49	26.5	15.5	35.5	14.5	1		1.76715	1.71418	2.40238	2.01533	1.75817	3.71063
54.4375	76.679	62.8901	32.0922	40.2981	41.4388		16	13.5	17	27.5	23.5	30		441	476	571	259	596	408		21	17.5	15.5	27.5	11.5	6		1.8897	1.76113	1.93323	2.74539	3.28253	2.45703
58.4556	37.1562	33.1439	45.2883	74.1594	78.7417		16.5	25.5	28.5	23.5	18	17.5		433	306	313.5	291	355.5	768.5		22	13.5	16.5	24	6.5	2		1.28678	1.43761	2.84322	2.46252	4.72269	2.67151
36.4145	33.851	39.9513	24.8149	65.2298	92.5402		28.5	26	22	40.5	21.5	15		408	358	310.5	160	480	466.5		31.5	29.5	68.5	17	3	1		1.71725	2.05557	2.17812	2.54035	3.17027	2.83612
52.7708	42.9592	50.9816	34.8519	38.8889	38.2108		15.5	17.5	20.5	31.5	31.5	24.5		394	354.5	296.5	695.5	390.5	507.5		24	32.5	36	19	1	12.5		1.42445	1.69768	2.57873	2.96177	3.02003	4.12971
40.4989	37.254	33.8409	33.9797	48.2455	54.4545		22	28.5	23	27	21.5	22		382	290	224	236.5	299	661		24.5	21	34	57.5	17	3.5		1.82188	1.59534	2.35233	2.30008	2.10446	1.9611
40.2954	17.9892	51.1765	46.6383	37.5797	290.111		23.5	42.5	18	23	29.5	6		469	158.5	412	357.5	641.5	727.5		21	53	26	20	11	4		2.27337	1.762	1.87636	2.19534	1.97156	3.10682
31.0368	26.3685	59.1193	43.8632	39.4672	45.0352		27	35	19	23.5	30.5	26.5		238.5	426.5	400	489.5	435.5	605.5		27	15.5	13.5	15.5	1	1		1.66934	1.49678	2.15247	2.29586	3.48229	3.14419
27.0278	39.6466	40.5201	43.9762	47.7443	82.5018		31	27.5	24.5	23	22	17		168	677	191	352.5	361	720.5		28	9	19	24.5	19.5	1		2.21314	1.52679	2.32742	2.41688	1.65627	2.60714
93.3304		31.7653			56.953		11		29.5			23.5		545		294.5			521.5		29.5		19.5			1		2.03966		1.94244			2.00935
Day Bout Length							Day Bout #
uas-dcr/+;nsybGS/+ RU-	uas-dcr/+;nsybGS/+ RU+	uas-atg1 RNAi#1/+ RU-	uas-atg1 RNAi#1/+ RU+	nsyb>dcr;RNAi RU-	nsyb>dcr;RNAi RU+		uas-dcr/+;nsybGS/+ RU-	uas-dcr/+;nsybGS/+ RU+	uas-atg1 RNAi#1/+ RU-	uas-atg1 RNAi#1/+ RU+	nsyb>dcr;RNAi RU-	nsyb>dcr;RNAi RU+
11.6367	7.58333	20.8208	14.1808	13.73	13.1343		27.5	20.5	15.5	24.5	27	26.5
21.4722	12.0071	20.7679	11.8148	18.5583	8.72801		15.5	26.5	17	26	29	44.5
8.86905	12.3113	21.2668	17.154	33.1535	17.7224		17.5	35.5	14.5	20	12.5	25
12.32	12.6745	13.6765	12.2533	18.5203	22.9801		25	27	17	17.5	19	26
10.8277	9.83871	11.0486	10.6767	9.5763	14.2457		25	28	8.5	20	26	30
11.3304	16.7869	16.5938	9.40278	9.6	11.2203		7.5	13.5	18	15	11	24
7.91071	10.9167	17.3882	24.0952	9.43736	11.9596		14.5	4	17.5	17.5	29.5	22
22.0774	10.6571	18.5682	15.6591	7.80357	17.7787		16.5	20.5	19	22.5	11	29.5
12.0917	16.5262	19.0909	12.5526	22.4615	22.188		13.5	24	13	19	20	22
29.7115	6.93056	23.9899	11.603	12.8045	47.0707		12.5	8.5	14.5	21	23.5	15.5
13.1044	8.01471	21.2381	21.0401	9.00263	14.5329		10	12.5	19.5	21	14.5	31
16.5076	10.6607	20.7083	14.7421	12.4328	18.7746		21.5	15	19	16	18.5	25
7.06614	6.08333	14.5881	11.963	12.7435	11.6714		31	5	21	27	16.5	17
24.0699	9.54444	24.5281	10.5989	16.6771	16.8145		12	9.5	16	21.5	25	25
12.2333	8.18381	16.8755	11.959	8.97488	20.9041		12.5	23	22.5	14	20.5	27
23.1167	9.62866	17.817	23.1353	13.1389	13.2926		13.5	18.5	22	16.5	33	29.5
14.2663	11.0814	15.0775	14.4125	11.3006	12.01		17.5	30.5	19.5	18	22	26.5
20.3361	22.3605	29.2765	15.0813	16.2547	31.1642		15.5	19.5	11.5	20.5	22	20.5
13.2292	13.5516	22.8977	27.625	11.2857	44.9018		23.5	19.5	13.5	5.5	9.5	15
18.3524	11.5795	32.3045	9.39286	13.5753	13.6583		21	28	12.5	10	29	31
20.2051	7.90079	17.8	15.7757	7.8098	29.9762		12.5	16	15	20	16	19.5
14.6178	7.71786	22.9583	14.5227	8.9675	34.1842		20	17	19	20.5	28.5	16
7.52632	13.2682	15	20.8434	21.9708	22.2166		19	26	20	13.5	19.5	25.5
17.725	41.8526	23.6562	11.6294	10.1905	21.206		11	9.5	14	21.5	22	25.5
32	14.911	14.1832	25.6667	44.5357	37.5456		9	20	19.5	12.5	14	17
34.0449	14.9423	19.2812	22.2315	34.8567	98.2		9.5	16.5	14	20.5	18.5	8.5
19.6636	14.2273	24.4833	12.69	18.0402	10.5682		10.5	12	16	30	28	22
18.3286	21.998	15.0032	19.7278	20.9583	26.6023		14.5	16	12.5	16.5	15	18.5
13.2601	10.7609	23.1212	20.1842	13.8527	179.111		18	23	13	19	25.5	5.5
17.4464	9.24333	27.7634	18.9152	19.0179	19.743		13	27.5	15	18.5	25	24
16.7563	16.0217	18.5997	24.5774	21.3529	41.1711		13	25.5	17.5	13	17	16.5
41.6333		16.1136			32.6375		8		19.5			18
Night Bout Length							Night Bout #
uas-dcr/+;nsybGS/+ RU-	uas-dcr/+;nsybGS/+ RU+	uas-atg1 RNAi#1/+ RU-	uas-atg1 RNAi#1/+ RU+	nsyb>dcr;RNAi RU-	nsyb>dcr;RNAi RU+		uas-dcr/+;nsybGS/+ RU-	uas-dcr/+;nsybGS/+ RU+	uas-atg1 RNAi#1/+ RU-	uas-atg1 RNAi#1/+ RU+	nsyb>dcr;RNAi RU-	nsyb>dcr;RNAi RU+
418.5	17.1977	45.2962	81.4545	407.917	139.5		3	17.5	11.5	8.5	3.5	5
387.438	225.25	151.521	133.667	138.089	49.0024		4.5	4	5.5	5	5.5	15.5
16.3005	44.575	67.4886	45.4107	470	57.9786		24.5	13.5	9.5	13	2	12
33.4343	30.2009	28.9454	20.33	184.3	131.578		14.5	15	15.5	26.5	4	10
25.8778	46.424	28.2436	226.45	529.75	190.4		19	14	12.5	3.5	1.5	4
22.675	21.75	43.8571	39.5635	65.4596	397.312		20	15	14	8	10	4.5
25.9474	46.4963	43.3516	139.075	79.4571	476.333		19	12.5	13.5	4.5	8.5	2
72.5519	497.25	207.964	134.8	115.925	539.75		9	1.5	4.5	5	7	1.5
46.3357	412.1	61.3095	17.0423	205.125	430.4		12	3	13.5	23.5	7	3
440.833	18.2045	146.45	383.111	83.9579	118.083		2	22	4.5	5	12	6
32.4732	31.234	45.7585	84.75	37.9167	211.55		15	12.5	13.5	9	16	6
52.1676	51.795	60.5966	478.5	65.2	444		16.5	16.5	9.5	1.5	10	2.5
60.6714	41.9731	47.4571	44.6875	54.2833	56.072		11	11.5	12	13.5	12.5	11.5
456.167	51.1444	73.1726	38.8242	184.667	720		2	9.5	9.5	13	4	1
63.2917	373.821	33.8529	205.964	29.2222	429.6		10	7.5	19.5	4.5	21	3
77.6591	156.896	170	150.444	49.9263	217.667		8.5	5.5	4.5	6	14.5	5.5
233.9	115.25	105.405	127.438	535.75	406.071		3.5	6	6.5	6	1.5	4
31.131	408.083	205.795	87.447	152.333	138.804		19	3.5	6.5	8.5	6	5.5
75.3247	223.917	95.625	57.2222	526.25	399		9	4	7	10.5	1.5	5
133.833	55.0192	52.4583	200.292	126.819	533		5	12.5	12	3.5	6.5	1.5
56.8292	120.111	84.375	173.5	401.286	190.133		11.5	10.5	12.5	4	4	4
106.838	39.7667	256.75	145.025	162.021	230.429		6.5	14.5	3	4.5	5.5	4.5
64.313	508.5	53.1063	135.667	529.25	358.75		14	1.5	13	5	1.5	2
141.083	176.867	418	109.171	530	140.7		5	4	3	6	1.5	5
92.3889	108.333	76.2273	74.5938	188.933	719		7.5	6	9	11	4	1
74.1515	66	89.9909	31.2587	208	104.55		19	9.5	8	20.5	3.5	7.5
129.583	112.893	145.225	526.75	178.5	291.833		5	5.5	4.5	1.5	4	2.5
92.15	70.0417	57.2917	58	112.162	206.542		7.5	13	10.5	10.5	6.5	3.5
382.7	26.5434	131.042	182.967	405.429	717		5.5	19.5	5	4	4	1
47.1754	114.943	227.583	164.881	125.639	207.625		14	7.5	4	5	6.5	3.5
34.2563	286.667	96.7708	102.656	142.792	539.75		18	2.5	7	10	5	1.5
239.125		124.471			128.556		3		10			6.5

## Sheet: Panels G-L
Total Bout Length							Total Bout #							Longest Bout							ZT12 Latency							Activity Index							Relative cDNA Level
uas-dcr/+;nsybGS/+ RU-	uas-dcr/+;nsybGS/+ RU+	uas-atg1 RNAi#4/+ RU-	uas-atg1 RNAi#4/+ RU+	nsyb>dcr;RNAi RU-	nsyb>dcr;RNAi RU+		uas-dcr/+;nsybGS/+ RU-	uas-dcr/+;nsybGS/+ RU+	uas-atg1 RNAi#4/+ RU-	uas-atg1 RNAi#4/+ RU+	nsyb>dcr;RNAi RU-	nsyb>dcr;RNAi RU+		uas-dcr/+;nsybGS/+ RU-	uas-dcr/+;nsybGS/+ RU+	uas-atg1 RNAi#4/+ RU-	uas-atg1 RNAi#4/+ RU+	nsyb>dcr;RNAi RU-	nsyb>dcr;RNAi RU+		uas-dcr/+;nsybGS/+ RU-	uas-dcr/+;nsybGS/+ RU+	uas-atg1 RNAi#4/+ RU-	uas-atg1 RNAi#4/+ RU+	nsyb>dcr;RNAi RU-	nsyb>dcr;RNAi RU+		uas-dcr/+;nsybGS/+ RU-	uas-dcr/+;nsybGS/+ RU+	uas-atg1 RNAi#4/+ RU-	uas-atg1 RNAi#4/+ RU+	nsyb>dcr;RNAi RU-	nsyb>dcr;RNAi RU+		uas-dcr/+;actinGS/+	uas-atg1 RNAi#4/+	actin>dcr;RNAi
33.8082	12.1952	29.7509	40.2654	29.9928	38.4006		30.5	37.5	33.5	25.5	35.5	25		648	101	106	426.5	673	553		25	16	16.5	16.5	7	10.5		1.9304	1.32888	1.89382	2.04201	4.57469	1.65607		1	0.79	0.27
54.9286	32.6175	91.4083	37.8625	37.7654	39.5928		20	30.5	13	30	26	30.5		576.5	453	288	227	398.5	574.5		22	40.5	98	41	9	9		1.54483	1.90947	1.46305	2.01723	3.38318	2.46779		1	1.25	0.37
13.2465	21.6288	37.2622	40.9248	25.1012	44.9519		42	48	26	24	46	25.5		63.5	249.5	109	339.5	216.5	719.5		37.5	1	23.5	16	13.5	3		1.76591	1.56859	1.9153	2.37085	2.36156	4.80881
19.7684	19.3942	36.3988	20.7814	25.8212	59.2289		39	41	26	45	43	21.5		106	226.5	171.5	138.5	416	550.5		20	1	21.5	18	1	9		1.59692	1.53264	1.5569	2.44197	2.2206	1.74514
17.2556	19.0372	37.9716	20.7855	30.9696	44.4908		44	41.5	23	29	31.5	29.5		161.5	229.5	201	122	631.5	541		11.5	9.5	21.5	27	20	1		2.09134	1.55369	1.86654	2.64275	2.60668	2.9844
19.5556	19.4294	38.1159	44.7143	65.6875	46.7464		27.5	28.5	23.5	24	19	26.5		143	157.5	184	480	448.5	728.5		40.5	42	37.5	16.5	22.5	1		1.61094	2.24699	1.36731	1.82911	2.72764	3.7895
18.5861	38.9304	44.8431	28.9516	25.4381	42.3949		33.5	16.5	22.5	29.5	40	28		129.5	173.5	194	312.5	204.5	571.5		23.5	41.5	17.5	35.5	12	7		1.87851	2.53906	1.86996	1.72028	2.05093	6.02428
40.1686	40.2727	48.6365	36.5529	31.889	20.1667		25.5	22	20.5	27.5	35	47.5		395.5	665	351	247	508.5	259.5		46.5	29.5	87.5	21.5	13	13		1.93766	1.84682	1.67062	1.95691	1.93261	3.98293
27.4269	39.7037	40.1705	27.3578	39.9147	43.8029		25.5	27	23	30.5	26	29.5		166	627	317	131.5	389.5	483		24.5	21	27	16.5	31	1		1.38646	1.78856	1.56517	1.6615	1.98797	3.75009
70.5952	15.0349	32.9025	40.8765	32.6088	93.4667		14.5	30.5	27	22.5	38.5	15		619	84.5	160.5	351	475	796		55	26	43	43.5	8.5	1		2.29825	1.75885	1.85365	1.67793	1.59552	4.46087
24.8382	20.0417	29.1179	26.5135	38.3365	44.0417		25	25	30	30.5	31	29		147	129.5	326	153	614	690.5		38.5	62.5	27.5	55.5	47.5	5		1.65334	1.60357	1.89286	1.90618	1.28051	2.65627
24.4536	26.5673	44.3937	36.8213	36.1078	35.9516		38	31.5	18	20.5	32.5	35.5		192.5	231.5	182	485.5	571.5	316.5		17.5	57.5	35	42	9.5	1		1.57212	1.83643	1.84576	1.80106	2.09127	4.41352
19.5506	30.6691	21.798	25.5764	56.1766	63.4241		42	16.5	29.5	36.5	24	15		217	228	99.5	173	558.5	446		31	57	28.5	46	6.5	1		1.1602	2.14208	1.88339	1.92181	2.95212	3.33502
68.6786	30.3444	22.9722	17.46	30.1306	34.0971		14	19	34	20	38.5	34.5		504	207.5	103.5	100.5	663.5	585		26.5	31	45	92	10.5	2		2.02357	1.67629	1.9539	2.27863	1.21429	3.03194
34.9259	28.8621	18.4074	39.3447	67.8329	28.0881		22.5	30.5	22.5	24.5	19.5	38.5		329.5	492.5	68	333.5	552	555.5		29.5	32	73	26	11.5	13.5		2.22331	1.30178	2.43249	1.34341	3.153	2.41283
42.5577	36.2413	25.9272	31.12	29.3111	105.888		22	24	33.5	27.5	38.5	13		298.5	445	199.5	307	673.5	471.5		40.5	22	29	25.5	14	4		1.75624	1.31887	1.76222	1.71258	2.4878	3.93058
43.625	25.8154	25.6987	44.1809	52.4278	61.7484		21	36	37	18.5	24	22		608	462	121	151	476.5	543		19	25.5	2	26.5	4	1		1.92447	1.76129	1.2941	1.82555	1.83672	3.17286
25.9813	49.5533	44.869	60.9405	59.9556	32.0652		34.5	23	13	14.5	21.5	40		143	602.5	202	190	704	574.5		36.5	21.5	15.5	16.5	17	1		1.26684	1.56713	1.57012	1.57425	3.17548	1.92751
29.6627	41.8411	48.5965	73.3993	81.7754	42.2885		32.5	22.5	20	12.5	17	26		508.5	467.5	379.5	653.5	534.5	729		8	1	21	12.5	1	1		1.71729	1.41603	2.02899	1.25124	2.63482	2.4726
39.5304	25.0174	41.608	52.0649	54.6489	39.2037		26	40.5	23	17	16.5	33		520	322	209	430	379.5	565		29.5	12	4.5	32	38	3		1.2375	2.33009	1.27006	1.68719	2.28538	2.7964
36.1071	31.0368	39.4596	68.8595	53.5743	67.8		24	26.5	23	13	26.5	19.5		271.5	426.5	476	446.5	550	546		31.5	42	48	24.5	10.5	8		1.95046	1.37224	1.91129	1.49066	1.69602	3.0078
35.4409	22.5679	124.922	64.0917		43.7622		26.5	31.5	9	13.5		31		299	227	516	281.5		638		23.5	15	34	27		1		1.99401	1.55941	1.98019	1.75715		2.27172
20.3988	37.0391	42.2143	39.5583		81.6684		33	27.5	21	24.5		17		288.5	566.5	356.5	343.5		434		49	26.5	12.5	20		2		1.76715	1.71418	1.66412	1.51483		2.60441
54.4375	76.679	39.0266	39.1076		50.0459		16	13.5	19	23		26		441	476	310.5	171		657		21	17.5	25.5	37		1		1.8897	1.76113	1.57337	1.77722		4.82606
58.4556	37.1562	32.9859	23.7249		80.1333		16.5	25.5	27.5	31		17.5		433	306	198.5	86		770.5		22	13.5	29	25		1		1.28678	1.43761	1.67803	1.81334		4.43165
36.4145	33.851	39.7024	50.8135		45.8381		28.5	26	26	19.5		23.5		408	358	648	488.5		514		31.5	29.5	12.5	12		9		1.71725	2.05557	1.71242	2.14737		2.81326
52.7708	42.9592	53.0724	38.2311		59.4451		15.5	17.5	30	29		22		394	354.5	300.5	348.5		698		24	32.5	15	1		3		1.42445	1.69768	2.13211	1.70916		4.81321
40.4989	37.254	50.7765	27.5475		39.8509		22	28.5	18.5	34.5		32.5		382	290	289.5	213		577.5		24.5	21	54.5	30		6		1.82188	1.59534	1.74163	2.00267		2.01185
40.2954	17.9892	63.8158	36.7418		74.8111		23.5	42.5	15.5	27		16.5		469	158.5	416	186		586		21	53	25	13.5		6		2.27337	1.762	2.01505	1.84123		1.87763
31.0368	26.3685	34.272	32.4126		34.0022		27	35	27	29.5		37.5		238.5	426.5	179.5	174		528		27	15.5	17.5	7.5		7.5		1.66934	1.49678	1.60276	1.4324		2.80616
27.0278	39.6466	58.3828	30.3505		31.5351		31	27.5	17	34.5		38.5		168	677	269.5	207		393.5		28	9	54.5	8		5.5		2.21314	1.52679	2.95858	1.59456		2.58079
93.3304		38.4943	31.7867				11		27	27.5				545		296	134.5				29.5		16	33.5				2.03966		2.12361	1.62481
Day Bout Length							Day Bout #
uas-dcr/+;nsybGS/+ RU-	uas-dcr/+;nsybGS/+ RU+	uas-atg1 RNAi#4/+ RU-	uas-atg1 RNAi#4/+ RU+	nsyb>dcr;RNAi RU-	nsyb>dcr;RNAi RU+		uas-dcr/+;nsybGS/+ RU-	uas-dcr/+;nsybGS/+ RU+	uas-atg1 RNAi#4/+ RU-	uas-atg1 RNAi#4/+ RU+	nsyb>dcr;RNAi RU-	nsyb>dcr;RNAi RU+
11.6367	7.58333	19.0392	22.9667	10.2361	10.5936		27.5	20.5	17.5	16	34	23.5
21.4722	12.0071	53.6667	21.3704	12.2381	19.3325		15.5	26.5	7.5	20	21	26.5
8.86905	12.3113	22.7667	20.7045	15.8445	16.7931		17.5	35.5	14	17.5	34.5	25
12.32	12.6745	19.7115	16.8246	11.4714	31.0588		25	27	14.5	22	35	17
10.8277	9.83871	23.7727	12.0971	9.08081	22.1964		25	28	11	13.5	30	27
11.3304	16.7869	23.381	24.5038	38.1606	20.3032		7.5	13.5	11.5	16.5	13	25.5
7.91071	10.9167	23.4452	19.1121	14.9002	18.4277		14.5	4	14.5	16.5	23.5	25.5
22.0774	10.6571	29.9786	22.9133	12.9788	9.53465		16.5	20.5	14	18	31.5	29
12.0917	16.5262	17.2308	20.3994	13.9464	24.5913		13.5	24	14.5	12.5	22	24
29.7115	6.93056	24.569	26.6012	19.8929	45.4667		12.5	8.5	14.5	13	28	15
13.1044	8.01471	12.5	21.4295	20.1943	19.9243		10	12.5	21.5	12.5	27.5	27
16.5076	10.6607	25.1202	8.45833	16.1411	21.6556		21.5	15	10.5	13.5	29.5	26
7.06614	6.08333	10.9911	18.7292	31.9962	25.0859		31	5	15	17	20	10
24.0699	9.54444	15.1804	7.875	12.5913	16.7736		12	9.5	16	6	35.5	28.5
12.2333	8.18381	11.2639	18.3654	41.7381	11.303		12.5	23	10.5	16.5	14.5	33
23.1167	9.62866	12.4453	22.0167	11.5711	59.4464		13.5	18.5	22.5	13.5	37	11
14.2663	11.0814	20.4167	54	28.6644	31.6711		17.5	30.5	17.5	4.5	19.5	19.5
20.3361	22.3605	27.35	40.1746	27.7255	15.0828		15.5	19.5	3.5	8	20.5	36
13.2292	13.5516	27.3149	15.274	51.0111	14.5962		23.5	19.5	12.5	10.5	14	26
18.3524	11.5795	25.7706	22.5139	21.4864	18.535		21	28	13.5	10.5	10.5	29.5
20.2051	7.90079	15.025	22.5083	26.4711	51.6058		12.5	16	17.5	8.5	21.5	12.5
14.6178	7.71786	108.367	43.0972		21.5387		20	17	4	6.5		28
7.52632	13.2681	13.558	21.9853		68.9141		19	26	15	15.5		10
17.725	41.8526	11.1136	21.4615		22.8843		11	9.5	10.5	13		25.5
32	14.911	24.9	10.8077		38.1333		9	20	12.5	12		17.5
34.0449	14.9423	14.2143	21.2595		18.9515		9.5	16.5	23	14.5		18.5
19.6636	14.2273	39.7526	19.7005		29.4605		10.5	12	12	19.5		20.5
18.3286	21.998	21.0976	21.4905		21.8846		14.5	16	14.5	18		26
13.2601	10.7609	43.2818	28.2005		39.7017		18	23	8	13.5		13.5
17.4464	9.24333	30.875	15.9948		21.9479		13	27.5	12	22		28
16.7563	16.0217	41.625	17.5563		22.2815		13	25.5	8	21.5		24
41.6333		20.8	23.5032				8		16.5	12.5
Night Bout Length
uas-dcr/+;nsybGS/+ RU-	uas-dcr/+;nsybGS/+ RU+	uas-atg1 RNAi#4/+ RU-	uas-atg1 RNAi#4/+ RU+	nsyb>dcr;RNAi RU-	nsyb>dcr;RNAi RU+		Night Bout #
418.5	17.1977	47.0045	71.7727	535	532.75		uas-dcr/+;nsybGS/+ RU-	uas-dcr/+;nsybGS/+ RU+	uas-atg1 RNAi#4/+ RU-	uas-atg1 RNAi#4/+ RU+	nsyb>dcr;RNAi RU-	nsyb>dcr;RNAi RU+
387.438	225.25	135.062	69.7033	221.188	405.643		3	17.5	16	9.5	1.5	1.5
16.3005	44.575	54.2083	115.083	80.8526	718		4.5	4	5.5	10	5	4
33.4343	30.2009	57.4242	24.5686	88.375	222.188		24.5	13.5	12	6.5	12	1
25.8778	46.424	51.3881	28.8235	525.5	250.55		14.5	15	11.5	23	9	5
22.675	21.75	56.5778	375.571	152.111	539.5		19	14	12	15.5	1.5	3.5
25.9474	46.4963	94.0636	44.232	40.3944	266.5		20	15	12	7.5	6	1.5
72.5519	497.25	91.0833	64.4716	246.55	42.0874		19	12.5	8	13	16.5	3
46.3357	412.1	95.0583	34.9548	180.933	109		9	1.5	6.5	9.5	3.5	18.5
440.833	18.2045	43.4545	60.7	67.8333	720		12	3	8.5	18	4	6.5
32.4732	31.234	71.2431	30.0511	184.667	445.125		2	22	12.5	9.5	10.5	1
52.1676	51.795	72.125	137.909	427.8	89.925		15	12.5	8.5	18	3.5	2.5
60.6714	41.9731	33.0457	37.2711	175	116.333		16.5	16.5	7.5	7	3	10.5
456.167	51.1444	29.8916	21.1711	426.1	107.679		11	11.5	14.5	19.5	4.5	6
63.2917	373.821	25.3222	83.5167	165.881	213.444		2	9.5	18	14	3	6.5
77.6591	156.896	53.8162	39.8051	464.5	293.083		10	7.5	12	8	5	5.5
233.9	115.25	29.8197	42.3571	222.188	419.083		8.5	5.5	11	14	2	2.5
31.131	408.083	53.2389	91.8	704	399.056		3.5	6	20	14	5	3.5
75.3247	223.917	95.95	467.333	239.333	720		19	3.5	9.5	6.5	1	5
133.833	55.0192	65.3333	140.067	112.5	417.25		9	4	7.5	2	4	1
56.8292	120.111	116.333	146.65	394	90.5089		5	12.5	10	6.5	6	3.5
106.838	39.7667	138	93		408.929		11.5	10.5	5.5	4.5	5	7.5
64.313	508.5	117.157	66.8611		92.0625		6.5	14.5	5	7		4
141.083	176.867	74.9929	64.1042		539.25		14	1.5	6	9.5		7.5
92.3889	108.333	40	32.8839		720		5	4	8.5	10		1.5
74.1515	66	261.75	141.167		161.714		7.5	6	15	19		1
129.583	112.893	64.05	78.15		352		19	9.5	3	5		5
92.15	70.0417	168.5	41.7304		150.773		5	5.5	18	10.5		2
382.7	26.5434	85.8393	45.8667		267.375		7.5	13	4	16.5		7
47.1754	114.943	42.0833	75.5625		373.556		5.5	19.5	7.5	13.5		3
34.2563	286.667	84.7615	60.5179		50.3308		14	7.5	15	8		9.5
239.125		104.507	38.5759				18	2.5	9	13.5		14.5
							3		10.5	15

## Sheet: Panels M-R
Total Bout Length							Total Bout #							Longest Bout							ZT12 Latency							Activity Index							Relative cDNA Level
uas-dcr/+;actinGS/+ RU-	uas-dcr/+;actinGS/+ RU+	uas-atg8b RNAi#1/+ RU-	uas-atg8b RNAi#1/+ RU+	actin>dcr;RNAi RU-	actin>dcr;RNAi RU+		uas-dcr/+;actinGS/+ RU-	uas-dcr/+;actinGS/+ RU+	uas-atg8b RNAi#1/+ RU-	uas-atg8b RNAi#1/+ RU+	actin>dcr;RNAi RU-	actin>dcr;RNAi RU+		uas-dcr/+;actinGS/+ RU-	uas-dcr/+;actinGS/+ RU+	uas-atg8b RNAi#1/+ RU-	uas-atg8b RNAi#1/+ RU+	actin>dcr;RNAi RU-	actin>dcr;RNAi RU+		uas-dcr/+;actinGS/+ RU-	uas-dcr/+;actinGS/+ RU+	uas-atg8b RNAi#1/+ RU-	uas-atg8b RNAi#1/+ RU+	actin>dcr;RNAi RU-	actin>dcr;RNAi RU+		uas-dcr/+;actinGS/+ RU-	uas-dcr/+;actinGS/+ RU+	uas-atg8b RNAi#1/+ RU-	uas-atg8b RNAi#1/+ RU+	actin>dcr;RNAi RU-	actin>dcr;RNAi RU+		uas-dcr/+;actinGS/+	uas-atg8b RNAi#1/+	actin>dcr;RNAi
28.4977	25.0792	33.2273	24.7987	21.8694	58.9435		29.5	25.5	31.5	37.5	46.5	19		171.5	140.5	590	312	225	675		41.5	24.5	12.5	12.5	16	5.5		1.65002	2.08722	1.33674	1.43321	1.61974	1.85384		1	1.13	0.26
21.4707	34.5091	49.888	31.281	36.109	39.8703		33.5	27	24.5	28	30	28		133.5	253.5	436	170	411.5	708.5		16	11.5	4	26.5	19	12.5		1.41114	1.99317	1.75138	1.89118	1.16838	0.721542		1	0.88	0.37
17.9045	27.2219	19.7843	16.7871	76.8269	47.2639		31.5	41	47	35.5	13.5	21		161.5	226	181.5	46.5	636	389.5		50	4.5	16.5	18.5	14.5	19		1.31639	0.898198	1.76361	1.95821	1.18009	2.03835
26.6835	20.3278	26.1286	27.1473	75.2896	106.268		30.5	42.5	37.5	37.5	15	12.5		141	206.5	257.5	180	672	631.5		23	12	26	18	15	14		1.77606	1.51699	1.6239	1.5131	1.19544	1.46036
25.8991	16.9002	33.666	23.5373	30.0016	35.5779		32.5	46	34.5	35.5	35.5	26.5		108.5	53.5	413.5	215.5	333	532.5		20	16.5	19.5	56	14.5	4.5		1.49017	1.08921	1.5247	1.70441	1.60236	1.24503
25.6887	23.309	23.9414	16.9712	41.4268	36.1524		29	34	32	53.5	30.5	28		160	200	122.5	141.5	331	338.5		26	4	29	8.5	1	6		1.67412	1.79336	1.56176	1.68549	1.27538	1.29398
38.3803	16.4357	29.9545	26.3918	33.3067	30.1322		26	47.5	33	38	31	30.5		417.5	58.5	318	280.5	358.5	264		13.5	14.5	9.5	1	16	17.5		1.37774	1.63252	1.35213	1.48089	1.27228	1.68868
41.7553	27.9677	27.5508	18.867	27.9969	44.2251		25	31	40	50.5	36	21.5		251.5	150	295.5	112	192.5	297.5		26.5	14	16.5	13.5	20	19		1.56981	1.88832	1.86382	2.02326	1.52652	1.52175
45.8596	17.5	30.7386	16.9527	27.015	40.4683		18.5	52	36	50.5	37.5	24.5		316.5	109	411	140.5	203	481.5		83	69	23	23	9.5	14		1.43767	1.62173	1.34652	1.89403	1.48766	1.2596
25.3522	12.8228	20.5078	18.5206	27.2872	42.0468		39	54	41	49.5	34.5	23		146	57	114	186.5	175.5	290.5		21.5	26	25	18	18.5	11.5		2.89133	1.43966	1.58566	1.49901	1.44025	1.56088
24.497	32.125	22.2103	25.95	23.0041	41.7411		36.5	31.5	45.5	35.5	36.5	26		278	216.5	164	200	231.5	461.5		16	11.5	18.5	7	47.5	15.5		1.07403	1.74203	1.56061	1.48324	1.24011	1.75466
22.9536	8.87115	26.7447	23.5508	33.7703	32.2113		37	58	42.5	43.5	27	34		163	29.5	311.5	216	445.5	308.5		10.5	18.5	14.5	15.5	21.5	13.5		1.90961	0.998993	1.83994	1.66367	1.91106	1.38613
23.7648	12.2668	25.8728	21.9573	42.4119	56.9725		36.5	36	37.5	45.5	28.5	16		130	43	261	274	468	221.5		17	133.5	44	21.5	22	27.5		1.52991	1.13353	1.16457	1.58098	1.24075	1.87786
16.3668	16.8526	25.5254	31.6896	28.5686	30.6954		37	57.5	37.5	34	35	32		105.5	145.5	201.5	397	415.5	283		69	11.5	31.5	18.5	14	72.5		1.51572	1.3298	1.86635	1.48611	1.5377	1.53476
19.6436	26.6562	24.4069	31.3019	31.5077	35.4		46	36	42.5	29.5	25.5	22		163.5	121.5	163.5	323	261.5	395.5		25	3	24.5	20.5	27.5	30.5		1.0365	1.36129	1.47241	1.43495	1.56739	1.12446
30.191	32.2553	28.0292	21.5073	26.3629	38.2619		25.5	29.5	32.5	31	38.5	24		287	560	251	100	219.5	315		19.5	5.5	31.5	19	52	8.5		1.25375	0.970654	1.58379	1.56946	1.41575	1.39775
47.3238	53.25	31.228	42.2832	49.1696	51.8079		20.5	22	28	24	19	19.5		319.5	474.5	315.5	546.5	220.5	712.5		43.5	10.5	25.5	19.5	19.5	8.5		1.86505	2.00776	2.3166	2.02283	1.20682	1.45917
35.1367	31.724	33.6387	45.2159	35.3824	51.9585		27	30	25.5	23	27.5	22.5		460	529	299.5	502.5	424.5	459.5		46.5	12	31	17.5	10	12		1.29023	1.47541	2.07866	2.22466	1.08844	1.757
41.6342	25.9257	50.425	33.4681	26.6889	62.0714		21.5	30	18	28.5	28.5	21		362.5	140	288	312	197	661		19.5	77.5	50.5	15	18.5	8.5		1.93081	1.06929	1.97628	2.19546	1.39214	1.70221
94.0417	19.3898	45.3845	47.3627	45.0113	52.1303		12.5	42	20.5	21	20	22		551.5	108	619.5	464	285	516		21	23.5	12.5	17	37.5	8		1.14232	0.89935	1.63563	1.89059	1.68921	1.18392
36.0365	36.599	46.6885	32.0583	25.773	34.8866		28	23	19.5	28.5	41.5	31		232	269.5	479.5	500	194.5	639		6.5	30.5	15.5	15.5	11.5	4.5		1.08682	1.44494	1.88148	2.09652	1.45877	0.789984
26.6482	14.8352	107.545	74.9643	35.6252	58.549		37.5	40.5	16	14	28	19		180	44.5	541	706	164.5	433		24	76.5	18.5	15	20.5	4		1.41979	1.59762	1.58955	1.84663	1.55896	1.66026
35.9012	37.2277	57.6146	82.447	51.9167	44.2233		20.5	22.5	17	14.5	15	21.5		271	158.5	644.5	572	373	300.5		26	41.5	16	17	14.5	16		1.15201	1.70437	1.82078	1.7541	1.64348	1.20827
32.63	28.0087	66.7062	48.8333	31.1052	51.9569		24.5	33	13	19.5	26	21.5		332	177.5	466.5	535	226.5	446		21.5	20.5	11	14.5	21.5	9		1.08669	1.4599	2.1567	1.81511	1.45346	1.1295
18.9275	17.7616	30.642	36.6039	35.3629	80.4788		31	47.5	23	27.5	21.5	13		77	164	279.5	234.5	164	645.5		23	8.5	55.5	42	11.5	14.5		1.37378	1.06929	2.26246	2.0426	1.83789	1.65244
30.6923	16.6716	39.0589	33.2902		62.4846		22	39.5	25.5	24		14		147	68	368.5	209.5		324.5		52	24.5	15	66		6.5		1.07239	1.64306	2.06225	1.56407		1.28866
20.3773	21.206	55.5833	29.1072		32.7257		36.5	48	12	30.5		25		183	168	253	113		229		39	4	27	26.5		8		1.47808	0.966296	2.4299	1.86021		1.26166
22.616	28.9839	31.6641	47.2274		83.8333		35	33.5	27	21.5		11		226.5	233	135	266		709		17	24	23	25.5		10.5		2.01472	2.11015	1.51076	2.2259		1.60999
21.9168	34.6397	58.1027	40.9489		49.1078		34.5	28	15	18		17.5		210	526.5	164.5	195.5		519		11.5	4.5	14.5	22.5		4		1.38573	1.42231	2.19382	2.13636		0.985393
33.9324	38.4773	65.5619	34.8162		25.6597		28.5	23	14.5	31		36		675	460.5	327	566		106.5		5.5	20	14.5	17.5		47		1.02027	1.69498	1.49846	2.44092		1.40634
	56.8077	46.0557	37.8017		63.4048			24	19.5	23.5		17			447	410	305.5		710.5			15.5	27	15		10.5			1.03738	1.93649	2.39766		1.5981
	28.6886	32.2946	32.3		36.9045			30	25.5	27		26.5			315.5	254.5	235.5		390			15.5	88.5	19		18.5			1.46252	1.70298	1.80813		1.74405
	13.6172		26.5857		57.0513			35.5		31		12.5			49		201.5		203			110.5		29.5		6			1.26212		2.43837		1.78297
	49.5457		22.8425		52.8228			14.5		30.5		17			292.5		116.5		554			14.5		63.5		18			2.20318		2.34447		1.94596
	6.7526		35.3822		166.438			25		29		8			11.5		226.5		983			105		21		2			1.19471		2.32137		1.58553
	26.9777		32.6759		30.2646			30		26.5		31.5			203.5		271		346.5			21.5		16.5		18			1.48345		2.39882		1.88829
	37.1499		33.4186					26		28.5					484.5		266					36.5		54					1.59816		2.81923
	34.2219		26.2278					23		31					303.5		217					9.5		38.5					1.28354		2.47973
	20.2125		34.8425					44		25.5					192.5		166.5					16.5		55					1.54116		2.42745
			18.1497							43.5							171.5							19.5							1.8083
			25.1813							33.5							313							14.5							3.74737
			43.0577							23							675							34.5							3.75032
			53.4711							14.5							316							27							1.63378
			25.0179							36							266.5							95							2.29014
			29.9499							36							288.5							1							2.68706
			23.8524							41							160							9.5							2.31358
			37.4377							24.5							469.5							15.5							2.07666
Day Bout Length							Day Bout #
uas-dcr/+;actinGS/+ RU-	uas-dcr/+;actinGS/+ RU+	uas-atg8b RNAi#1/+ RU-	uas-atg8b RNAi#1/+ RU+	actin>dcr;RNAi RU-	actin>dcr;RNAi RU+		uas-dcr/+;actinGS/+ RU-	uas-dcr/+;actinGS/+ RU+	uas-atg8b RNAi#1/+ RU-	uas-atg8b RNAi#1/+ RU+	actin>dcr;RNAi RU-	actin>dcr;RNAi RU+
31.5972	9.39444	15.3077	13.3531	12.2607	21.7329		10.5	9.5	26	24	35	15.5
19.15	17.6201	23.9793	27.8	18.0217	14.8292		14.5	17.5	21.5	9	23	27
10.75	15.6614	11.1324	13.9968	28.2867	21.7964		16	27.5	33.5	12.5	12	15
19.7812	9.65833	15.625	17.1833	31.9821	47.4333		16	23.5	26	25	13	11
15.1077	11.4083	19.4297	11.7429	12.7464	9.45217		14	19.5	27	23	30	24
14.0392	10.7107	28.3786	10.1669	29.9879	12.1032		14.5	20.5	8.5	35	18.5	23
18.2833	10.1056	13.7308	14.4821	17.3841	10.04		18	19	25	24.5	22	21
33.9167	17.0327	15.4598	12.8217	14.8269	22.2483		12.5	17.5	30	31	26	12
25.0379	9.90789	14.3514	13.8766	17.9018	13.9989		11.5	38	32	25	22.5	21.5
22.0938	7.05808	13.3557	11.3401	17.2523	27.2333		16	20	24	32.5	18	11
10.8654	13.5972	17.5926	13.4051	12.2065	19.0606		24.5	21	27	22.5	22.5	23
21.5509	7.24746	18.5814	14.7308	10.7407	16.88		17	23	30	26	22.5	25
12.0242	6.32353	13.062	10.7302	25.1185	45.9286		25	12.5	25	33.5	21.5	6
9.60833	9.61966	12.5146	19.3503	15.2942	13.0558		16	37.5	25.5	24	23	23
8.98571	22.8059	15.16	14.8115	71.9167	8.97059		35	18.5	32.5	19.5	5.5	15
8.6875	9.58	12.4776	9.02807	20.249	11.7516		14	24.5	23	17	23.5	17.5
28.4167	27.2958	15.9945	16.5237	16.8929	16.0716		12	17.5	13.5	19.5	12	18.5
14.3431	10.5417	15.1846	18.4737	13.025	30.2619		21.5	23	14	19	19	16
16.3616	14.3527	21.9667	15	20.5192	30.75		15	15	14	22	11.5	17.5
58.8643	8.41908	13.3611	17.5031	29.2708	20.8837		8.5	20.5	17	18	10	19.5
20.8472	11.1396	14.6652	11.1432	14.7892	12.8018		17	15.5	15	21	32	29
14.5654	8.55357	43.825	26.4231	19.9583	29.2696		25.5	16.5	12.5	13	13	14.5
9.66154	16.6444	21.0196	35.5	12.0659	17.8616		14	12	14.5	12.5	10	15
7.21405	12.3214	15.5455	21.2885	14.2167	17.8038		17.5	16.5	9	13.5	11	16.5
12.404	8.27778	13.9732	18.4638	15.25	27.9269		18	27	15	19	10	11.5
7.45238	8.68889	12.4699	19.7033		22.2153		8	9.5	21.5	13.5		8.5
8.61278	10.8179	8.58333	16.7908		8.78846		20	31.5	3.5	17.5		10.5
10.2556	14.625	14.1639	21.1511		20.7273		19	22	15.5	13.5		10
9.86364	11.4844	30.1607	14.0268		10.9688		19	23	7.5	7.5		14
10.1987	11.4934	28.2125	14.737		13.8133		25	17.5	9	26.5		21.5
	31	13.9471	12.1971		20.5833			13	14.5	14.5		16
	9.56684	13.925	17.0768		19.2698			19.5	18.5	17.5		16
	6.71667		12.3056		6.25			14.5		18		2
	7.90476		18		13.6875			5		17.5		14
	6.84091		25.5333		82.3304			12.5		15		7.5
	11.2893		9.73684		13.8056			17		20		18
	16.101		16.5138					20		20
	8.74359		12.0541					12.5		18.5
	9.65803		21.1507					24.5		15
			13.2522							21.5
			10.0119							16
			14.2153							21
			5.83333							7
			11.5179							17
			18.3879							25
			14.4272							24.5
			14.2909							18.5
Night Bout Length							Night Bout #
uas-dcr/+;actinGS/+ RU-	uas-dcr/+;actinGS/+ RU+	uas-atg8b RNAi#1/+ RU-	uas-atg8b RNAi#1/+ RU+	actin>dcr;RNAi RU-	actin>dcr;RNAi RU+		uas-dcr/+;actinGS/+ RU-	uas-dcr/+;actinGS/+ RU+	uas-atg8b RNAi#1/+ RU-	uas-atg8b RNAi#1/+ RU+	actin>dcr;RNAi RU-	actin>dcr;RNAi RU+
26.7417	34.3438	122.125	44.625	52.6825	417.333		19	16	6	14	11.5	3.5
25.6292	69.506	203	36.6953	97.4375	708.5		19	9.5	3.5	19	7	1
25.2017	49.2396	44.2382	18.0853	526.25	111.586		15.5	14	13.5	23	1.5	6
37.6263	33.5829	49.8485	44.9062	467	527.75		14.5	19.5	11.5	13	2	1.5
35.1553	21.9304	80.4286	45.4968	135.321	297.333		18.5	26.5	8	12.5	5.5	2.5
44.5583	42.8083	22.3611	29.6849	55.3529	162.976		14.5	13.5	23.5	19	13	5
132.615	20.6722	78.1357	49.1333	72.1607	81		8	28.5	8.5	14.5	9.5	9.5
49.5877	42.2418	62.6442	27.875	60.2778	72.3222		12.5	13.5	10.5	20	10.5	9.5
80	39.2526	161.75	20.1875	41.9189	257.875		7	14.5	4	25.5	15.5	3
30.2751	16.5839	32.9242	31.4412	42.2273	57.1667		23	34	17	17.5	16.5	12
52.25	79.1333	28.4412	46.0549	45.5731	227.4		12	10.5	19	13.5	14	3.5
24.6892	9.81908	51.3301	37.9643	215.786	75.7375		20.5	35	13	17.5	4.5	9
49.6692	15.8315	56.8934	58.125	98.2083	64.55		11.5	23.5	12.5	12	7	10
21.6045	30.8453	69.0556	69.5357	56.3929	89.9846		21	20	12	10.5	12	9
58.7679	30.5524	50.15	63.2323	24.6288	92.1875		11	18	10.5	10	20	7
131.192	389.05	65.8222	36.3929	35.6674	113.737		11.5	5.5	9.5	14	15	6.5
74.3333	138.7	45.8486	172	118.4	712.5		8.5	5	14.5	4.5	7	1
196.083	205.625	62.817	183.533	110.071	125.347		5.5	7	11.5	4	9	6.5
100.655	44.8175	159.133	103.263	30.0114	185.233		6.5	15	4	6.5	17.5	4
230.5	30.2794	246.25	251.75	62.7828	442.75		4	21.5	3.5	3	10	2.5
57.9365	92.25	393.938	93.5278	60.0152	474.167		11.5	7.5	4.5	7.5	10	2
53.7071	19.4127	407.5	706	59.9876	142.792		12	24	3.5	1	15	5
93.4881	60.4182	436.625	466.5	117.033	118.111		6.5	10.5	2.5	2	5.5	6.5
90.1518	46.3822	183.4	112.9	49.9127	392.944		7.5	17	4	6	15	5
31.0327	29.9583	61.8125	76.1319	51.35	527.75		13	21	8	8.5	12	1.5
49.0965	19.3889	174.5	51.5833		125.233		14	30	4	10.5		5.5
35.1541	42.1974	83.2652	45.869		51.0368		16.5	16.5	8.5	13		14.5
37.3125	61.9833	55.0871	113.5		709		16	11.5	11.5	8		1
37.5688	139.5	86.0446	61.375		415.5		16	5.5	7.5	10.5		3.5
188.867	125.6	137.125	154.125		43.5769		4	5.5	5.5	4.5		14.5
	133.491	161.595	85.875		710.5			11	5	9		1
	66.226	88.6	61.5682		79.9			10.5	7	9.5		10.5
	18.5275		47.1091		66.7682			21		13		10.5
	71.0667		31.3879		232.5			9.5		13		3
	6.53333		47.7647		719			12.5		14		1
	55.5347		109.513		60.7039			13		6.5		13.5
	106.417		86.0667					6		8.5
	68.0481		47.6558					10.5		12.5
	35.8843		55.3136					19.5		10.5
			23.1136							22
			45.8974							17.5
			340.25							2
			88.5714							7.5
			60.8879							19
			76.3889							12
			42.053							17
			144.833							6

## Sheet: Panels S-X
Total Bout Length							Total Bout #							Longest Bout							ZT12 Latency							Activity Index							Relative cDNA Level
uas-dcr/+;actinGS/+ RU-	uas-dcr/+;actinGS/+ RU+	uas-atg8b RNAi#2/+ RU-	uas-atg8b RNAi#2/+ RU+	actin>dcr;RNAi RU-	actin>dcr;RNAi RU+		uas-dcr/+;actinGS/+ RU-	uas-dcr/+;actinGS/+ RU+	uas-atg8b RNAi#2/+ RU-	uas-atg8b RNAi#2/+ RU+	actin>dcr;RNAi RU-	actin>dcr;RNAi RU+		uas-dcr/+;actinGS/+ RU-	uas-dcr/+;actinGS/+ RU+	uas-atg8b RNAi#2/+ RU-	uas-atg8b RNAi#2/+ RU+	actin>dcr;RNAi RU-	actin>dcr;RNAi RU+		uas-dcr/+;actinGS/+ RU-	uas-dcr/+;actinGS/+ RU+	uas-atg8b RNAi#2/+ RU-	uas-atg8b RNAi#2/+ RU+	actin>dcr;RNAi RU-	actin>dcr;RNAi RU+		uas-dcr/+;actinGS/+ RU-	uas-dcr/+;actinGS/+ RU+	uas-atg8b RNAi#2/+ RU-	uas-atg8b RNAi#2/+ RU+	actin>dcr;RNAi RU-	actin>dcr;RNAi RU+		uas-dcr/+;actinGS/+	uas-atg8b RNAi#2/+	actin>dcr;RNAi
28.4977	25.0792	38.6739	40.7933	26.5138	43.8496		29.5	25.5	23	20	33	20		171.5	140.5	292.5	382	232.5	492.5		41.5	24.5	31	31	44	24.5		1.65002	2.08722	1.35415	1.37712	1.78142	1.60219		1	0.93	0.3
21.4707	34.5091	37.6587	45.6917	35.6911	50.1587		33.5	27	24	19	32	20.5		133.5	253.5	307	150.5	332.5	455.5		16	11.5	31	13.5	9	11		1.41114	1.99317	1.39902	1.4216	0.929352	0.96089		1	1.55	0.21
17.9045	27.2219	30.6481	47.5126	55.4846	36.8914		31.5	41	27	19	19	32.5		161.5	226	161	221.5	530.5	263.5		50	4.5	25	68.5	18.5	16		1.31639	0.898198	1.20481	1.7436	1.27544	1.21539
26.6835	20.3278	30.6888	35.0333	50.5068	92.9161		30.5	42.5	29	30	19.5	12		141	206.5	357.5	391	364.5	507.5		23	12	22	27	26	17.5		1.77606	1.51699	1.38902	1.77064	1.37581	1.46324
25.8991	16.9002	57.7574	25.6158	68.2671	75.0848		32.5	46	18.5	28.5	15.5	15		108.5	53.5	329	105	413	525		20	16.5	30	36.5	30	10.5		1.49017	1.08921	1.58123	1.64516	1.82672	1.34392
25.6887	23.309	66.6814	50.7231	41.7092	59.7052		29	34	14.5	21	24.5	19.5		160	200	438.5	452	335.5	296		26	4	23.5	32.5	32.5	15		1.67412	1.79336	1.67409	1.4202	1.34515	1.38462
38.3803	16.4357	33.228	28.1201	31.6	33.8843		26	47.5	26.5	31.5	22	27.5		417.5	58.5	313.5	234	270	272		13.5	14.5	58	17	34	16.5		1.37774	1.63252	1.49189	1.45874	1.3401	1.42783
41.7553	27.9677	26.4778	33.037	37.8636	85.0273		25	31	33	27.5	25.5	10.5		251.5	150	189	203	426	698.5		26.5	14	41	22	38.5	13		1.56981	1.88832	1.44213	1.4354	1.2689	1.86762
45.8596	17.5	63.8764	35.5133	34.9532	146.917		18.5	52	18	23	28	9		316.5	109	401	168	376	650		83	69	36	18	1	22.5		1.43767	1.62173	1.62491	1.48735	1.07283	1.19625
25.3522	12.8228	29.2611	27.9985	30.5355	101.615		39	54	28.5	31.5	38	13.5		146	57	335	95	376.5	561.5		21.5	26	23	22	20.5	36		2.89133	1.43966	1.68922	1.49546	1.02296	1.18992
24.497	32.125	66.6667	32.8185	90.7364	51.6105		36.5	31.5	17.5	26	10.5	23.5		278	216.5	500	233	332.5	501.5		16	11.5	16	20.5	16	9		1.07403	1.74203	1.28281	1.68483	1.19948	1.03729
22.9536	8.87115	18.7886	36.2289	60.177	60.7674		37	58	43.5	25	18.5	19.5		163	29.5	250	181.5	461.5	636.5		10.5	18.5	24.5	18.5	91.5	12		1.90961	0.998993	1.19775	1.40211	1.28836	1.2593
23.7648	12.2668	46.6667	32.4834	44.7463	85.329		36.5	36	20	28.5	22	16		130	43	272.5	356	481	704.5		17	133.5	21	33	28.5	13.5		1.52991	1.13353	1.48993	1.23315	1.38548	1.2706
16.3668	16.8526	49.8122	34.9896	73.5227	60.8851		37	57.5	21.5	32.5	16.5	18.5		105.5	145.5	304.5	617.5	694.5	441		69	11.5	21	10	20	18		1.51572	1.3298	1.44689	1.36678	1.44696	1.25023
19.6436	26.6562	37.4598	39.1859	70.2784	59.4474		46	36	28	25.5	16	19		163.5	121.5	216.5	177.5	705	297.5		25	3	27.5	18.5	16	11		1.0365	1.36129	1.9706	1.57898	1.45766	1.0975
30.191	32.2553	30.6895	21.323	112.731	99.1		25.5	29.5	33	39.5	10	12.5		287	560	480	83.5	649.5	704		19.5	5.5	32.5	20.5	21	13.5		1.25375	0.970654	1.44964	2.07653	1.18216	1.28608
47.3238	53.25	35.3637	59.9334	49.6144	74.0256		20.5	22	32	18	21	17		319.5	474.5	199	453.5	471	534.5		43.5	10.5	13	28	18	9		1.86505	2.00776	1.42846	1.59548	1.48675	1.0592
35.1367	31.724	77.7786	28.4288	47.0417			27	30	14.5	31.5	21			460	529	556.5	256.5	281			46.5	12	21.5	78	46			1.29023	1.47541	1.40281	1.41681	1.46286
41.6342	25.9257	33.075	40.1383	59.9872			21.5	30	27	24	17			362.5	140	378	506	328.5			19.5	77.5	19	5	25			1.93081	1.06929	1.25821	1.27823	1.79982
94.0417	19.3898	43.2722	37.737				12.5	42	24	28.5				551.5	108	288	369				21	23.5	21	16.5				1.14232	0.89935	1.4137	1.62881
36.0365	36.599	45.4583	71				28	23	24	13.5				232	269.5	344	595.5				6.5	30.5	24.5	15				1.08682	1.44494	1.19801	1.75561
26.6482	14.8352	46.2067	70.9646				37.5	40.5	23	15.5				180	44.5	387.5	315				24	76.5	20	17.5				1.41979	1.59762	1.44573	1.61278
35.9012	37.2277	46.1053	30.6951				20.5	22.5	17	32				271	158.5	439.5	266.5				26	41.5	25	26				1.15201	1.70437	1.56127	2.02557
32.63	28.0087	38.1159	39.5295				24.5	33	23.5	21				332	177.5	247	173.5				21.5	20.5	30	20.5				1.08669	1.4599	1.40299	1.60972
18.9275	17.7616	63.7851	49.6319				31	47.5	15.5	21				77	164	358.5	573.5				23	8.5	16.5	24				1.37378	1.06929	1.1912	1.28241
30.6923	16.6716	59.6535	53.0625				22	39.5	18.5	17				147	68	698	404.5				52	24.5	23	86.5				1.07239	1.64306	1.09401	1.28573
20.3773	21.206	90.7008	65.3938				36.5	48	11.5	19				183	168	591.5	615.5				39	4	19.5	56				1.47808	0.966296	1.18766	1.51048
22.616		59.1374	48.5286				35		17	18				226.5		267.5	194.5				17		42.5	29				2.01472		1.12596	1.56598
21.9168		58.5944	64.1944				34.5		18	16.5				210		471.5	305.5				11.5		16.5	25				1.38573		1.47003	1.44881
33.9324		37.1217	83.9522				28.5		21.5	12.5				675		148.5	533				5.5		40	56.5				1.02027		1.78658	1.87277
		129.435	111.205						9	11						700.5	510.5						20.5	25						1.36474	1.15195
		42.0778	92.7727						29.5	11						229	567						42.5	30						1.44757	1.40287
Day Bout Length							Day Bout #
uas-dcr/+;actinGS/+ RU-	uas-dcr/+;actinGS/+ RU+	uas-atg8b RNAi#2/+ RU-	uas-atg8b RNAi#2/+ RU+	actin>dcr;RNAi RU-	actin>dcr;RNAi RU+		uas-dcr/+;actinGS/+ RU-	uas-dcr/+;actinGS/+ RU+	uas-atg8b RNAi#2/+ RU-	uas-atg8b RNAi#2/+ RU+	actin>dcr;RNAi RU-	actin>dcr;RNAi RU+
31.5972	9.39444	17.792	16.2273	29.9077	15.8869		10.5	9.5	15.5	12	11.5	13
19.15	17.6201	18.6269	40	19.7481	17.6545		14.5	17.5	16.5	6.5	23	13
10.75	15.6614	25.3095	35.0909	28.8654	30.6786		16	27.5	11.5	11	12.5	17.5
19.7812	9.65833	13.1965	18.5332	21.6111	55.5179		16	23.5	19.5	24	15	7.5
15.1077	11.4083	35.0076	22.3125	41.5556	34.7378		14	19.5	11.5	10	9.5	12
14.0392	10.7107	37.1349	24.4353	25.0833	51.2976		14.5	20.5	8	16	17.5	9.5
18.2833	10.1056	16.1562	12.9	15.1326	19.598		18	19	15.5	15	11.5	14.5
33.9167	17.0327	14.9813	17.4688	12.1291	20.675		12.5	17.5	19.5	15.5	17.5	9
25.0379	9.90789	33.1849	17.4394	16.5588	78.35		11.5	38	12	11.5	17	6.5
22.0938	7.05808	12.5805	18.9524	16.069	64.8929		16	20	18	14.5	29	10.5
10.8654	13.5972	36.8909	12.364	48.0429	23.9286		24.5	21	13	16.5	6	21
21.5509	7.24746	7.86903	17.1643	32.6761	27.8676		17	23	28	14.5	13.5	16.5
12.0242	6.32353	28.2083	12.9313	15.1551	40.0789		25	12.5	10	23.5	19	14.5
9.60833	9.61966	32.9357	15.5417	28.325	26.4375		16	37.5	12	30	15	14
8.98571	22.8059	27.058	18.6	27.7857	31.5513		35	18.5	15	15	15	14
8.6875	9.58	14.8036	26.9462	43.75	45.2949		14	24.5	23	11.5	8	11
28.4167	27.2958	23.6023	32.0476	19.0261	33.125		12	17.5	21	13	17.5	15
14.3431	10.5417	38.0192	12.1096	30.4545			21.5	23	11.5	26	11
16.3616	14.3527	16.7059	13.2	34.2917			15	15	15.5	20	10.5
58.8643	8.41908	22.7059	19.2955				8.5	20.5	14.5	20
20.8472	11.1396	23.9931	27.5208				17	15.5	17	10
14.5654	8.55357	21.2961	36.8182				25.5	16.5	17.5	11
9.66154	16.6444	9.91259	24.8854				14	12	12	14
7.21405	12.3214	18.9543	18.4026				17.5	16.5	14.5	12.5
12.404	8.27778	25.3782	19.6656				18	27	12	18
7.45238	8.68889	23.1405	23.8187				8	9.5	17.5	13.5
8.61278	10.8179	40.7468	31.8597				20	31.5	9	17
10.2556		24.9833	16.9833				19		12.5	12.5
9.86364		28.4615	43.8444				19		13	9.5
10.1987		17.5664	29.9286				25		12	10.5
		54.4	64.325						8	8.5
		33.2222	44.5893						9.5	7.5
Night Bout Length							Night Bout #
uas-dcr/+;actinGS/+ RU-	uas-dcr/+;actinGS/+ RU+	uas-atg8b RNAi#2/+ RU-	uas-atg8b RNAi#2/+ RU+	actin>dcr;RNAi RU-	actin>dcr;RNAi RU+		uas-dcr/+;actinGS/+ RU-	uas-dcr/+;actinGS/+ RU+	uas-atg8b RNAi#2/+ RU-	uas-atg8b RNAi#2/+ RU+	actin>dcr;RNAi RU-	actin>dcr;RNAi RU+
26.7417	34.3438	85.6389	81.9	25.4145	105.322		19	16	7.5	8.5	21.5	7
25.6292	69.506	80.3661	48.9968	76.4444	147		19	9.5	7.5	12.5	9	7.5
25.2017	49.2396	37.2735	67.1667	110.787	44.125		15.5	14	15.5	8	6.5	15
37.6263	33.5829	73.9295	98.7625	144.675	173.417		14.5	19.5	9.5	6.5	4.5	4.5
35.1553	21.9304	96.3125	28.4821	143.889	235.667		18.5	26.5	7	18.5	6	3
44.5583	42.8083	104.888	212.125	133.864	68.1515		14.5	13.5	6.5	5	7	10
132.615	20.6722	91.0556	52.4025	50.1806	53.6187		8	28.5	11	16.5	10.5	13
49.5877	42.2418	43.0275	53.5769	366.467	528		12.5	13.5	13.5	12	8	1.5
80	39.2526	121.25	53.5871	69.9444	435.25		7	14.5	6	11.5	12	2.5
30.2751	16.5839	58.0091	35.7396	107.408	226.167		23	34	10.5	17	9.5	3
52.25	79.1333	151.725	69.6193	171.25	295.917		12	10.5	4.5	9.5	4.5	2.5
24.6892	9.81908	44.3131	65.5913	147.786	423.7		20.5	35	15.5	10.5	5	3
49.6692	15.8315	65.125	151.643	258	530		11.5	23.5	10	5	3	1.5
21.6045	30.8453	71.0398	223.667	525.5	224.786		21	20	9.5	3	1.5	4.5
58.7679	30.5524	51.7059	101.824	705	144.292		11	18	13	10.5	1	5
131.192	389.05	66.1313	19.6739	465.333	530		11.5	5.5	10	28	2	1.5
74.3333	138.7	55.1212	132.6	410.833	474.833		8.5	5	11.5	5	3.5	2
196.083	205.625	420.3	106.317	70.4121			5.5	7	3	5.5	10
100.655	44.8175	55.3	186.833	110.278			6.5	15	11.5	4	6.5
230.5	30.2794	79.8974	98				4	21.5	9.5	8.5
57.9365	92.25	106.711	199.292				11.5	7.5	7	3.5
53.7071	19.4127	212.083	156.175				12	24	5.5	4.5
93.4881	60.4182	136.958	36.9643				6.5	10.5	5	18
90.1518	46.3822	73.1818	71.4722				7.5	17	9	8.5
31.0327	29.9583	242.75	256.375				13	21	3.5	3
49.0965	19.3889	698	168				14	30	1	3.5
35.1541	42.1974	436.875	322.75				16.5	16.5	2.5	2
37.3125		161.917	118.317				16		4.5	5.5
37.5688		142.083	92.8125				16		5	7
188.867		61.8111	424.833				4		9.5	2
		700.5	286.917						1	2.5
		66.9857	200.208						20	3.5
