# Supplementary material for: Short and long sleeping mutants reveal links between sleep and macroautophagy
Source: eLife. 2021 Jun 4;10:e64140. doi: 10.7554/eLife.64140 (PMC8177895; doi:10.7554/eLife.64140)
Supplement: Figure 7—source data 1. [file elife-64140-fig7-data1.xlsx]

## Sheet: Panel 7A
see Table S3

## Sheet: Panel 7B
see Table S3

## Sheet: Panel 7C
Total Sleep							Day Sleep							Night Sleep
uas-dcr/+;nsybGS/+ RU-	uas-dcr/+;nsybGS/+ RU+	uas-atg1 RNAi#1/+ RU-	uas-atg1 RNAi#1/+ RU+	nsyb>dcr;RNAi RU-	nsyb>dcr;RNAi RU+		uas-dcr/+;nsybGS/+ RU-	uas-dcr/+;nsybGS/+ RU+	uas-atg1 RNAi#1/+ RU-	uas-atg1 RNAi#1/+ RU+	nsyb>dcr;RNAi RU-	nsyb>dcr;RNAi RU+		uas-dcr/+;nsybGS/+ RU-	uas-dcr/+;nsybGS/+ RU+	uas-atg1 RNAi#1/+ RU-	uas-atg1 RNAi#1/+ RU+	nsyb>dcr;RNAi RU-	nsyb>dcr;RNAi RU+
1013.5	458	835	983	1053.5	1043		321	155.5	322.5	347	358.5	345.5		692.5	302.5	512.5	636	695	697.5
991	992.5	997	946	1239	1032.5		324	318	344	307	536	389		667	674.5	653	639	703	643.5
552.5	1024	925	926	989.5	1069.5		155	433	304.5	338.5	286.5	395		397.5	591	620.5	587.5	703	674.5
762.5	792	680	752.5	1039	1227		308	340.5	232.5	213.5	350.5	553.5		454.5	451.5	447.5	539	688.5	673.5
759.5	783.5	447	850	957	1133		270	272	95	212	250	419		489.5	511.5	352	638	707	714
538.5	542.5	906	451.5	753.5	974		85	219.5	292	142	107	270		453.5	323	614	309.5	646.5	704
612	540.5	888.5	1027	930.5	977.5		119	46.5	304.5	408.5	278	265.5		493	494	584	618.5	652.5	712
945	886	970.5	1026.5	742	1243.5		327.5	218.5	341	352.5	86	524		617.5	667.5	629.5	674	656	719.5
698.5	1072	782.5	624.5	1107.5	1184		162	393.5	240	238.5	416	472		536.5	678.5	542.5	386	691.5	712
1022	459	959.5	903.5	942	1284		370.5	58.5	309	239.5	296	575.5		651.5	400.5	650.5	664	646	708.5
617.5	498	1008.5	1111	714	1135.5		130.5	107	412.5	435.5	126.5	444		487	391	596	675.5	587.5	691.5
871	770.5	893	853.5	883	1181.5		352	162	329	228.5	231	469		519	608.5	564	625	652	712.5
798	505.5	858	903	858.5	838		220.5	30.5	305	323	206	195.5		577.5	475	553	580	652.5	642.5
961.5	578.5	998	718	1102.5	1128		287	90.5	351	232	409.5	408		674.5	488	647	486	693	720
765.5	852.5	966	806.5	735.5	1267.5		157	188.5	366	166	184.5	555.5		608.5	664	600	640.5	551	712
896.5	862	1027.5	1045.5	1080.5	1092.5		308.5	178.5	350	373.5	428	390		588	683.5	677.5	672	652.5	702.5
912.5	927	971	936	965	1024		250	336.5	289.5	260	251	320.5		662.5	590.5	681.5	676	714	703.5
857	1131.5	1022	983.5	1042	1335.5		309.5	435.5	335.5	307	357	629		547.5	696	686.5	676.5	685	706.5
963	916	954.5	727	813.5	1381.5		311	264.5	297.5	139	114	670.5		652	651.5	657	588	699.5	711
1027	1009.5	1032	779.5	1095	1134.5		384	323	402.5	93.5	395.5	423		643	686.5	629.5	686	699.5	711.5
842	701	928.5	1009.5	814.5	1291		252.5	126.5	267	315.5	126.5	579		589.5	574.5	661.5	694	688	712
939	711.5	1081	942.5	956.5	1227		289.5	134	401	297	257	511.5		649.5	577.5	680	645.5	699.5	715.5
589	1013.5	950.5	932	1090.5	1280		143	344	300	280	384.5	562.5		446	669.5	650.5	652	706	717.5
871	1008	1001	879.5	933	1241.5		194	351	323	244.5	226.5	538		677	657	678	635	706.5	703.5
955	947.5	916	960.5	1331.5	1342.5		288	297.5	273.5	312	623.5	623.5		667	650	642.5	648.5	708	719
876.5	852	876.5	997.5	1247.5	1382.5		277.5	241.5	264	389	534.5	690.5		599	610.5	612.5	608.5	713	692
816.5	750	1008	1076	1186.5	935		204.5	173.5	361	375	472.5	232.5		612	576.5	647	701	714	702.5
877	979	774.5	900.5	995.5	1198		266.5	350.5	188.5	324	305.5	490.5		610.5	628.5	586	576.5	690	707.5
927.5	764	920	1071	1048.5	1321		237	247.5	295	383.5	343.5	604		690.5	516.5	625	687.5	705	717
782.5	921.5	1094	1031.5	1166.5	1178		224.5	253	414.5	348	469.5	466.5		558	668.5	679.5	683.5	697	711.5
825.5	1087.5	988.5	950.5	1047.5	1383		213.5	403.5	325	319	363	663.5		612	684	663.5	631.5	684.5	719.5
947		902			1292		309		312			582.5		638		590			709.5

## Sheet: Panel 7D
Total Sleep							Day Sleep							Night Sleep
uas-dcr/+;nsybGS/+ RU-	uas-dcr/+;nsybGS/+ RU+	uas-atg1 RNAi#4/+ RU-	uas-atg1 RNAi#4/+ RU+	nsyb>dcr;RNAi RU-	nsyb>dcr;RNAi RU+		uas-dcr/+;nsybGS/+ RU-	uas-dcr/+;nsybGS/+ RU+	uas-atg1 RNAi#4/+ RU-	uas-atg1 RNAi#4/+ RU+	nsyb>dcr;RNAi RU-	nsyb>dcr;RNAi RU+		uas-dcr/+;nsybGS/+ RU-	uas-dcr/+;nsybGS/+ RU+	uas-atg1 RNAi#4/+ RU-	uas-atg1 RNAi#4/+ RU+	nsyb>dcr;RNAi RU-	nsyb>dcr;RNAi RU+
1013.5	458	967	1027.5	1062	961.5		321	155.5	332.5	362.5	349	252.5		692.5	302.5	634.5	665	713	709
991	992.5	833	995	961.5	1173		324	318	237.5	367	257	466.5		667	674.5	595.5	628	704.5	706.5
552.5	1024	966	971.5	1153	1135.5		155	433	315.5	329.5	531	417.5		397.5	591	650.5	642	622	718
762.5	792	939	913	1107	1233		308	340.5	279.5	352.5	401.5	528		454.5	451.5	659.5	560.5	705.5	705
759.5	783.5	873	596.5	971.5	1312		270	272	261.5	150	272	598.5		489.5	511.5	611.5	446.5	699.5	713.5
538.5	542.5	894.5	1053	1161.5	1233		85	219.5	261.5	384	487.5	514		453.5	323	633	669	674	719
612	540.5	983	846.5	1008.5	1178		119	46.5	339.5	315	348	469		493	494	643.5	531.5	660.5	709
945	886	983.5	1004.5	1111	915		327.5	218.5	397	411	410	275.5		617.5	667.5	586.5	593.5	701	639.5
698.5	1072	913.5	824	970.5	1291		162	393.5	249.5	248.5	291.5	587		536.5	678.5	664	575.5	679	704
1022	459	887	919	1254	1402		370.5	58.5	355	343.5	557	682		651.5	400.5	532	575.5	697	720
617.5	498	872	807	1188	1234.5		130.5	107	268	267.5	555	522		487	391	604	539.5	633	712.5
871	770.5	789	735.5	1156.5	1228		352	162	250	114.5	451.5	562.5		519	608.5	539	621	705	665.5
798	505.5	638	889.5	1337.5	949.5		220.5	30.5	163.5	316.5	637.5	251.5		577.5	475	474.5	573	700	698
961.5	578.5	778	325.5	1149.5	1170.5		287	90.5	242	48.5	449	474.5		674.5	488	536	277	700.5	696
765.5	852.5	393	912	1296	1069		157	188.5	118.5	289.5	603.5	373		608.5	664	274.5	622.5	692.5	696
896.5	862	844	848.5	1127	1304.5		308.5	178.5	275.5	295.5	427.5	603.5		588	683.5	568.5	553	699.5	701
912.5	927	942	811	1255	1331.5		250	336.5	358.5	218	551.5	617		662.5	590.5	583.5	593	703.5	714.5
857	1131.5	581	883	1243	1253		309.5	435.5	77.5	316	539	541.5		547.5	696	503.5	567	704	711.5
963	916	970	866	1370	1099.5		311	264.5	334	172	653	379.5		652	651.5	636	694	717	720
1027	1009.5	955.5	871.5	903.5	1250.5		384	323	327.5	231.5	228.5	539.5		643	686.5	628	640	675	711
842	701	889	799.5	1233.5	1320.5		252.5	126.5	255	149	531.5	645		589.5	574.5	634	650.5	702	675.5
939	711.5	1065	849		1294		289.5	134	404.5	213.5		591.5		649.5	577.5	660.5	635.5		702.5
589	1013.5	886.5	968.5		1370.5		143	344	205	335.5		682.5		446	669.5	681.5	633		688
871	1008	732.5	895.5		1298		194	351	116.5	279		579.5		677	657	616	616.5		718.5
955	947.5	893.5	705.5		1372.5		288	297.5	294	129.5		652.5		667	650	599.5	576		720
876.5	852	1019.5	982		1026.5		277.5	241.5	326.5	307		342.5		599	610.5	693	675		684
816.5	750	932	1050.5		1305		204.5	173.5	318.5	381.5		601		612	576.5	613.5	669		704
877	979	934	943.5		1271.5		266.5	350.5	306.5	368.5		569		610.5	628.5	627.5	575		702.5
927.5	764	932.5	990.5		1218		237	247.5	292.5	380		505		690.5	516.5	640	610.5		713
782.5	921.5	924	956		1253		224.5	253	322	351.5		598		558	668.5	602	604.5		655
825.5	1087.5	944.5	987.5		1213		213.5	403.5	333	377		528.5		612	684	611.5	610.5		684.5
947		1007.5	867				309		337.5	292.5				638		670	574.5

## Sheet: Panel 7E
Total Sleep							Day Sleep							Night Sleep
uas-dcr/+;actinGS/+ RU-	uas-dcr/+;actinGS/+ RU+	uas-atg8b RNAi#1/+ RU-	uas-atg8b RNAi#1/+ RU+	actin>dcr;RNAi RU-	actin>dcr;RNAi RU+		uas-dcr/+;actinGS/+ RU-	uas-dcr/+;actinGS/+ RU+	uas-atg8b RNAi#1/+ RU-	uas-atg8b RNAi#1/+ RU+	actin>dcr;RNAi RU-	actin>dcr;RNAi RU+		uas-dcr/+;actinGS/+ RU-	uas-dcr/+;actinGS/+ RU+	uas-atg8b RNAi#1/+ RU-	uas-atg8b RNAi#1/+ RU+	actin>dcr;RNAi RU-	actin>dcr;RNAi RU+
833.5	638.5	1044	930	1004	1037.5		329	89	398	319	427	326		504.5	549.5	646	611	577	711.5
686.5	911	1208	808.5	1081	1100.5		277	310.5	512	249	414.5	392		409.5	600.5	696	559.5	666.5	708.5
564	1103.5	921	587	1036	970.5		172	429	373	177	337	319		392	674.5	548	410	699	651.5
792	823	976	963	1111	1158		316.5	227	403	408	415	451.5		475.5	596	573	555	696	706.5
821	779	1156.5	820.5	1065	939		213	216.5	522.5	267	381	226		608	562.5	634	553.5	684	713
732.5	787.5	747.5	908	1186.5	958		197	219	233	352.5	533.5	272.5		535.5	568.5	514.5	555.5	653	685.5
964.5	781	988.5	949	1027	853.5		330.5	191.5	343	355	382.5	203		634	589.5	645.5	594	644.5	650.5
1017	867	1078.5	947	1004	950.5		405	298	458.5	389.5	385.5	265.5		612	569	620	557.5	618.5	685
848	909	1106.5	855	1012	992		288	376.5	459.5	341.5	399	303		560	532.5	647	513.5	613	689
909.5	689	827.5	917	923.5	938		353.5	140.5	321.5	368	309.5	298.5		556	548.5	506	549	614	639.5
891.5	943.5	1008.5	921	840	1073		264.5	277	475	301	268	435.5		627	666.5	533.5	620	572	637.5
804.5	504	1136.5	1020	911.5	1095		364	165	543	383	243.5	422		440.5	339	593.5	637	668	673
858	442.5	926	971.5	1208.5	905		299	80.5	320.5	357	537	259.5		559	362	605.5	614.5	671.5	645.5
603.5	962.5	935	1075.5	998	909		148.5	360	319	433	340.5	288		455	602.5	616	642.5	657.5	621
898	936.5	987	911	803	762		314.5	419.5	463	286	314.5	130.5		583.5	517	524	625	488.5	631.5
751	925.5	902	664.5	971	902.5		119	234.5	279	155	448.5	203.5		632	691	623	509.5	522.5	699
969.5	1171.5	872.5	1009	866.5	1009.5		341	478	216	322.5	198.5	297		628.5	693.5	656.5	686.5	668	712.5
919.5	934	814	1039	910.5	1168.5		308	241.5	212	351	247	476		611.5	692.5	602	688	663.5	692.5
896	774	890.5	947.5	757	1159.5		247	207.5	305.5	320	231.5	465		649	566.5	585	627.5	525.5	694.5
1174.5	798.5	929.5	986.5	898.5	1106.5		481.5	173.5	227	314.5	279	399		693	625	702.5	672	619.5	707.5
991	838.5	897	909	1066	1070		353.5	173.5	216.5	234.5	471.5	361.5		637.5	665	680.5	674.5	594.5	708.5
991.5	600	959.5	1049.5	897.5	1100		371	138	287	343.5	259.5	413		620.5	462	672.5	706	638	687
735	809.5	976	1117.5	754	926.5		132	177	291.5	420	114	266		603	632.5	684.5	697.5	640	660.5
798.5	803.5	821	943	774.5	978		126.5	223.5	131	285.5	155	281.5		672	580	690	657.5	619.5	696.5
575.5	836	703	983.5	752	1009		223.5	223.5	208.5	338	152.5	305		352	612.5	494.5	645.5	599.5	704
644	636.5	951.5	789		872.5		59.5	82	253.5	265.5		191		584.5	554.5	698	523.5		681.5
729.5	1018.5	667	885.5		754		170.5	340.5	26.5	294		93		559	678	640.5	591.5		661
792	968.5	852.5	955		917		195	320.5	220	283		208		597	648	632.5	672		709
756	966.5	867.5	735.5		857		179.5	258.5	226.5	104		156.5		576.5	708	641	631.5		700.5
962	883	949	1070.5		914		256	198.5	252	385.5		284.5		706	684.5	697	685		629.5
	1046.5	863.5	859.5		1007.5			371.5	201	179		297			675	662.5	680.5		710.5
	841.5	822	867.5		974.5			189	259	299		295			652.5	563	568.5		679.5
	477		818.5		712			97.5		221.5		12.5			379.5		597		699.5
	713		699		883.5			40		300		186			673		399		697.5
	176		1012		1331.5			93.5		383		612.5			82.5		629		719
	801		865		927.5			194.5		195		248.5			606.5		670		679
	943		917					304.5		328					638.5		589
	780.5		810					109		223					671.5		587
	877		872.5					238		293.5					639		579
			787.5							279							508.5
			735							156.5							578.5
			972.5							292							680.5
			705							42.5							662.5
			671							190.5							480.5
			1069.5							389.5							680
			977.5							331.5							646
			904							264.5							639.5

## Sheet: Panel 7F
Total Sleep							Day Sleep							Night Sleep
uas-dcr/+;actinGS/+ RU-	uas-dcr/+;actinGS/+ RU+	uas-atg8b RNAi#2/+ RU-	uas-atg8b RNAi#2/+ RU+	actin>dcr;RNAi RU-	actin>dcr;RNAi RU+		uas-dcr/+;actinGS/+ RU-	uas-dcr/+;actinGS/+ RU+	uas-atg8b RNAi#2/+ RU-	uas-atg8b RNAi#2/+ RU+	actin>dcr;RNAi RU-	actin>dcr;RNAi RU+		uas-dcr/+;actinGS/+ RU-	uas-dcr/+;actinGS/+ RU+	uas-atg8b RNAi#2/+ RU-	uas-atg8b RNAi#2/+ RU+	actin>dcr;RNAi RU-	actin>dcr;RNAi RU+
833.5	638.5	889.5	761.5	873.5	874		329	89	271.5	194.5	337.5	204.5		504.5	549.5	618	567	536	669.5
686.5	911	890.5	862.5	1140	916		277	310.5	291.5	261.5	452	223		409.5	600.5	599	601	688	693
564	1103.5	827.5	894	1040	1175.5		172	429	268.5	386	359.5	517.5		392	674.5	559	508	680.5	658
792	823	831.5	1051	951	1105		316.5	227	249	441.5	307	415.5		475.5	596	582.5	609.5	644	689.5
821	779	1062.5	730	1034	1122.5		213	216.5	402.5	212.5	392	415.5		608	562.5	660	517.5	642	707
732.5	787.5	936.5	1054	1021	1124.5		197	219	291.5	389	416.5	449.5		535.5	568.5	645	665	604.5	675
964.5	781	805	814	688	932.5		330.5	191.5	251	193.5	173.5	269		634	589.5	554	620.5	514.5	663.5
1017	867	864	907	872	894.5		405	298	284	271.5	212	192		612	569	580	635.5	660	702.5
848	909	979	815.5	922.5	1184		288	376.5	332	201	281.5	488.5		560	532.5	647	614.5	641	695.5
909.5	689	833	881.5	1127	1284		353.5	140.5	224.5	275	466	605.5		556	548.5	608.5	606.5	661	678.5
891.5	943.5	1140	846.5	952	1212		264.5	277	467	203.5	272.5	502.5		627	666.5	673	643	679.5	709.5
804.5	504	774.5	889.5	1044	1163.5		364	165	218.5	249	423.5	459		440.5	339	556	640.5	620.5	704.5
858	442.5	895.5	925.5	971.5	1221		299	80.5	271	298	283.5	514		559	362	624.5	627.5	688	707
603.5	962.5	1039	1137	1069.5	1059		148.5	360	387.5	466	370.5	363		455	602.5	651.5	671	699	696
898	936.5	1009	931	1120	1129.5		314.5	419.5	402	279	415	439.5		583.5	517	607	652	705	690
751	925.5	976	832.5	1018.5	1180		119	234.5	322	305	323.5	473.5		632	691	654	527.5	695	706.5
969.5	1171.5	1127.5	1075.5	1030.5	1177		341	478	495.5	412.5	333	468.5		628.5	693.5	632	663	697.5	708.5
919.5	934	1126.5	892	970.5			308	241.5	429	314	335			611.5	692.5	697.5	578	635.5
896	774	885	961.5	958.5			247	207.5	257	264	351			649	566.5	628	697.5	607.5
1174.5	798.5	973.5	1070.5				481.5	173.5	321	384.5				693	625	652.5	686
991	838.5	1089.5	951				353.5	173.5	405.5	269.5				637.5	665	684	681.5
991.5	600	1056.5	1099				371	138	367.5	405				620.5	462	689	694
735	809.5	770	977.5				132	177	118.5	344				603	632.5	651.5	633.5
798.5	803.5	896	827.5				126.5	223.5	269	223				672	580	627	604.5
575.5	836	932.5	1017				223.5	223.5	240	331.5				352	612.5	692.5	685.5
644	636.5	1102	899				59.5	82	404	320.5				584.5	554.5	698	578.5
729.5	1018.5	1042	1099				170.5	340.5	350.5	453.5				559	678	691.5	645.5
792		942.5	841.5				195		292	197.5				597		650.5	644
756		1051	1050				179.5		370	416				576.5		681	634
962		795	903.5				256		208	278				706		587	625.5
		1103.5	1127.5						403	441.5						700.5	686
		855	1020.5						313.5	334.5						541.5	686
