# Supplementary material for: Short and long sleeping mutants reveal links between sleep and macroautophagy
Source: eLife. 2021 Jun 4;10:e64140. doi: 10.7554/eLife.64140 (PMC8177895; doi:10.7554/eLife.64140)
Supplement: Figure 8—figure supplement 1—source data 1. [file elife-64140-fig17-data17.xlsx]

## Sheet: Panel B
Puncta #
Vehicle	Rapamycin
14.171	25.043
21.832	23.883
17.217	26.316

## Sheet: Panel C
Puncta Size
Vehicle	Rapamycin
1.98417	2.19153
2.51868	4.35486
2.10107	3.34834

## Sheet: Panel D
Autophagosome %			Autolysosome %
Vehicle	Rapamycin		Vehicle	Rapamycin
34.7259	21.7426		65.2742	78.2574
23.3694	17.7741		76.6306	82.2258
27.7284	21.1696		72.2716	78.8304

## Sheet: Panel E
ZT1-12 Sleep
Vehicle	Gaboxadol
398	472
327	564
55	630
272	613
288	629
214	651
464	497
226	573
216	550
115	612
46	603
324	559
578	347
398	612
383	547
85	593
434	511
187	565
67	608
388	496
63	534
418	525
323	653
262	592
293	609
	566
