# Supplementary material for: Short and long sleeping mutants reveal links between sleep and macroautophagy
Source: eLife. 2021 Jun 4;10:e64140. doi: 10.7554/eLife.64140 (PMC8177895; doi:10.7554/eLife.64140)
Supplement: Figure 8—source data 1. [file elife-64140-fig8-data1.xlsx]

## Sheet: Panels B-D
Puncta #			Puncta Size			Autophagosome %			Autolysosome %
ZT0-2	ZT12-14		ZT0-2	ZT12-14		ZT0-2	ZT12-14		ZT0-2	ZT12-14
19.409	19.035		1.62157	1.6622		29.4691	32.5611		70.5309	67.4389
18.691	15.538		1.97915	1.92724		27.9814	34.7599		72.0186	65.2401
15.737	16.755		2.08881	2.23436		29.3258	34.8732		70.6742	65.1268
14.325	15.759		2.22865	2.18682		36.6169	34.6976		63.3831	65.3024
11.599	12.883		2.20579	2.15397		32.7328	42.2883		67.2672	57.7117
11.391	19.521		2.235	2.99511		37.5033	25.6083		62.4967	74.3917
13.421	14.956		2.14508	2.09067		38.0449	41.9765		61.9551	58.0235
14.561	24.326		1.54047	2.24768		41.875	25.0288		58.125	74.9712
14.973	20.376		1.49864	1.62216		41.0472	33.3072		58.9528	66.6928
16.473	25.996		1.50748	2.29688		39.6345	27.8581		60.3655	72.1419
16.512	21.287		1.55133	1.60223		41.2246	31.7814		58.7754	68.2185
18.452	20.827		1.52511	1.65295		39.0039	33.0485		60.9961	66.9515
15.702	21.427		1.65084	1.891		40.3669	30.9064		59.6331	69.0936
24.946	16.224		2.15606	1.76756		25.8759	35.4083		74.1241	64.5917
14.138	16.763		1.55579	1.82738		38.6759	38.0004		61.3241	61.9996

## Sheet: Panels F-H
Puncta #			Puncta Size			Autophagosome %			Autolysosome %
ZT0-2	ZT0-2 SD		ZT0-2	ZT0-2 SD		ZT0-2	ZT0-2 SD		ZT0-2	ZT0-2 SD
12.449	15.044		1.20626	1.26572		28.4762	32.0393		71.5238	67.9607
13.242	10.91		1.30319	1.19193		36.0217	32.9423		63.9783	67.0577
11.307	11.525		1.23868	1.20057		32.1451	34.8381		67.8549	65.1619
14.383	18.488		1.28104	1.11225		32.0378	28.2856		67.9622	71.7144
14.809	12.427		1.24226	1.19624		33.1825	38.8719		66.8175	61.1281
10.026	12.471		1.0239	1.26181		39.4834	38.4492		60.5166	61.5508
7.151	10.628		1.22953	1.25125		43.4065	38.6714		56.5935	61.3286
12.015	19.145		1.14726	1.56915		33.3666	29.8616		66.6334	70.1384
8.577	15.176		1.10554	1.13909		37.1472	33.9813		62.8528	66.0187
14.58	13.759		1.21764	1.26545		30.9351	30.7704		69.0649	69.2297
11.083	11.955		1.12879	1.21269		43.6615	34.5604		56.3385	65.4396
12.51	13.982		1.19079	1.18547		37.1623	36.3591		62.8377	63.6409
10.827	17.616		1.2898	1.22162		37.0589	25.2214		62.9411	74.7786
	12.178			1.16352			36.8862			63.1138
	14.445			1.26846			39.9003			60.0997
	11.983			1.46256			40.0901			59.9099
	8.959			1.17131			39.2566			60.7434
	12.296			1.25611			38.2075			61.7925
	15.231			1.59988			33.4581			66.5419
	15.98			1.31538			31.3642			68.6358

## Sheet: Panels J-L
Puncta #			Puncta Size			Autophagosome %			Autolysosome %
ZT12-14 Vehicle	ZT12-14 Gaboxadol		ZT12-14 vehicle	ZT12-14 gaboxadol		ZT12-14 vehicle	ZT12-14 gaboxadol		ZT12-14 vehicle	ZT12-14 gaboxadol
21.958	18.384		1.93961	1.87784		33.5641	29.5692		66.4359	70.4308
20.959	19.911		1.8827	1.95406		33.5369	38.5515		66.4631	61.4485
22.916	16.875		2.04001	2.00769		28.779	38.4237		71.221	61.5763
17.617	18.635		1.96566	2.18955		36.811	30.9471		63.189	69.0529
21.997	14.494		2.11304	1.75892		28.9858	43.8181		71.0142	56.1819
19.315	17.394		2.26817	2.74951		28.4805	27.7164		71.5195	72.2836
22.756	17.346		2.09792	1.84151		26.9467	29.4419		73.0533	70.558
22.124	24.788		1.8444	1.93082		31.0116	29.7886		68.9884	70.2114
20.281	8.568		1.89469	1.47616		33.5437	28.6881		66.4563	71.3119
23.914	17.745		2.30952	2.0041		29.8528	29.4618		70.1472	70.5382
26.229	19.236		2.89169	2.07274		32.1629	36.0782		67.8371	63.9218
17.48	18.373		1.80579	2.03662		30.4405	34.1697		69.5595	65.8303
20.436	17.806		2.12681	2.1252		31.3809	33.2472		68.6191	66.7528
18.299	16.745		1.87695	2.10038		34.3735	29.8835		65.6265	70.1165
18.245	17.716		1.90027	1.90657		35.111	35.4877		64.889	64.5123
19.358	13.45		1.81554	1.70954		29.5743	38.8327		70.4257	61.1673
19.723	17.806		2.0703	2.45588		30.6444	23.2169		69.3556	76.7831
20.231	14.089		1.9075	2.04338		26.3358	32.6709		73.6642	67.3291
25.347	19.628		1.95075	1.69774		28.9226	30.5278		71.0774	69.4722
22.956	14.188		1.89582	1.94675		31.543	39.7096		68.457	60.2904
21.171	19.404		2.04102	1.82971		30.1497	29.9165		69.8503	70.0835
25.951	14.224		2.00535	1.94793		29.1935	41.0644		70.8065	58.9356
24.093	17.29		1.87826	2.2748		25.9038	30.5668		74.0962	69.4332
21.416	20.062		1.93242	1.82338		26.4942	29.7278		73.5058	70.2722
16.85	17.145		1.80945	2.27947		32.9139	33.3392		67.0861	66.6608
	20.851			2.08569			25.4424			74.5576
