# Supplementary material for: Short and long sleeping mutants reveal links between sleep and macroautophagy
Source: eLife. 2021 Jun 4;10:e64140. doi: 10.7554/eLife.64140 (PMC8177895; doi:10.7554/eLife.64140)
Supplement: Supplementary file 1. — Tab 1: A figure-by-figure breakdown of alleles, sources, and backgrounds for each fly line used in most figures of the manuscript. Tab2: A list of all primer sequences used in producing and validating the novel fly lines described in the manuscript. [file elife-64140-supp1.xlsx]

## Sheet: Fly Strains Used--Revision
Lines used in our unbiased screen that identified argus (see Shi et al, 2014).
iso31: control strain fed mutagen	PMID: 15238529	lab-generated allele	iso31 background
argus	novel EMS allele	lab-generated allele	iso31 background (5X)
Balancer Strain(w::TM2/TM6C Sb)	Bloomington	#5906	iso31 background
Chr3 Mapping Strain	Bloomington	#576	stock center background
Generation of CG16791/aus CRISPR mutant
vas-Cas9	Bloomington/rainbowtransgenic service	#51323	stock center background
Figure 1
iso31 control	PMID: 15238529	lab-generated allele	iso31 background	panels A-E
argus	novel EMS allele	lab-generated allele	iso31 background (5X)	panels A-E
Figure 2
iso31 control	PMID: 15238529	lab-generated allele	iso31 background	panels A,B,E
argus	novel EMS allele	lab-generated allele	iso31 background (5X)	panels A,B,E
NsybGal4 (Chr3)	PMID: 18267092	gift from Leslie Griffiths	w1118	panels C-D
UAS-Dicer2 (Chr2)	Vienna	#60008	w1118	panels C-D
cg16791 RNAi#1	Vienna	#45436	stock center background	panel C
cg16791 RNAi#2	Bloomington	#64015	stock center background	panel D
Figure 3
iso31 control	PMID: 15238529	lab-generated allele	iso31 background	panels A-C
argus	novel EMS allele	lab-generated allele	iso31 background (5X)	panels A-C
cg16791 P1	Bloomington	#25578	stock center background	panel A
cg16791 CRISPR Knockout	novel null allele	lab-generated allele	iso31 background (5X)	panel B
elav-Gal4 (ChrX)	Bloomington	#456	stock center background	panel C
UAS-cg16791 Over-Expression	novel over-expression allele1	lab-generated allele	iso31 background	panel C
Figure 4
iso31 control	PMID: 15238529	lab-generated allele	iso31 background	panels A-C
argus	novel EMS allele	lab-generated allele	iso31 background (5X)	panels A-C
UAS-cg16791 Over-Expression	novel over-expression allele1	lab-generated allele	iso31 background	panels A-B
UAS-GFP	Bloomington	#1521	iso31 background	panels A-B
aus2k-Gal4	novel Gal4 driver 2	lab-generated allele	iso31 background	panel A
c929-Gal4	Bloomington	#25373	iso31 background (5X)	panel B
dimmed	Bloomington	#21432	mixed iso31 / stock center	panel C
Figure 5
argus	novel EMS allele	lab-generated allele	iso31 background (5X)	panels A-C
elav-Gal4 (Chr2)	Bloomington	#8765	iso31 background	panels A-C
UAS-GFP-mCherry-atg8a	Bloomington	#37749	iso31 background (5X)	panels A-C
Figure 6
iso31 control	PMID: 15238529	lab-generated allele	iso31 background	panel A
blue cheese 58	Bloomington	#9887	iso31 background (5X)	panels A-B
argus	novel EMS allele	lab-generated allele	iso31 background (5X)	panels B-C
elav-Gal4 (Chr2)	Bloomington	#8765	iso31 background	panels C-D
UAS-atg5 RNAi	Bloomington	#27551	mixed iso31 / stock center	panel C
UAS-atg7 RNAi	Bloomington	#27707	mixed iso31 / stock center	panel D
Figure 7
nsyb-geneswitch (Chr 3)	PMID: 29590612	made in-lab by Paula Haynes	iso31 background	panels A,C,D
actingeneswitch (Chr 3)	PMID: 16269336	gift from Ken Irvine	iso31 background	panels B,E,F
UAS-Dicer2 (Chr2)	Vienna	#60008	w1118	panels A-F
assorted autophagy RNAi alleles	see Supplemental File 3	see Supplemental File 3	stock center backgrounds	panels A-B
atg1 RNAi#1	Bloomington	#35177	iso31 background (5X)	panel C
atg1 RNAi#4	Vienna	#330433	iso31 background (5X)	panel D
atg8b RNAi#1	Bloomington	#27554	iso31 background (5X)	panel E
atg8b RNAi#2	Vienna	#101922	iso31 background (5X)	panel F
Figure 8
elav-Gal4 (Chr2)	Bloomington	#8765	iso31 background	panels A-F
UAS-GFP-mCherry-atg8a	Bloomington	#37749	iso31 background (5X)	panels A-F
Figure 1--Supplemental Figure 1
iso31 control	PMID: 15238529	lab-generated allele	iso31 background	panels A-B
argus	novel EMS allele	lab-generated allele	iso31 background (5X)	panels A-B
Figure 2--Supplemental Figure 1
iso31 control	PMID: 15238529	lab-generated allele	iso31 background	panels A-B
argus	novel EMS allele	lab-generated allele	iso31 background (5X)	panels A-B
nrxΔ80	PMID: 17498701	gift from Xie lab	mixed iso31 / original stock	panels A-B
Figure 3--Supplemental Figure 2
iso31 control	PMID: 15238529	lab-generated allele	iso31 background	panels A-C
elav-Gal4 (Chr2)	Bloomington	#8765	iso31 background	panels A-B
UAS-Dicer (Chr2)	Bloomington	#25750	iso31 background	panels A-B
cg16791 RNAi#1	Vienna	#45436	stock center background	panels A-B,D
actingeneswitch (Chr 3)	PMID: 16269336	gift from Ken Irvine	iso31 background	panel C
UAS-Dicer2 (Chr2)	Vienna	#60008	w1118	panel C
cg16791 RNAi#2	Bloomington	#64015	stock center background	panel C,D
Figure 3--Supplemental Figure 1
cg16791 CRISPR Knockout	novel null allele	lab-generated allele	iso31 background (5X)	panels A-C
iso31 control	PMID: 15238529	lab-generated allele	iso31 background	panels C-D
argus	novel EMS allele	lab-generated allele	iso31 background (5X)	panels C-D
uas-cg16791-full length	novel overexpression allele2	lab-generated allele	iso31 background	panel D
elav-Gal4 (Chr2)	Bloomington	#8765	iso31 background	panel D
Figure 6--Supplemental Figure 1
iso31 control	PMID: 15238529	lab-generated allele	iso31 background	panels A-F
blue cheese 58	Bloomington	#9887	iso31 background (5X)	panels A-F
argus	novel EMS allele	lab-generated allele	iso31 background (5X)	panels F
Figure 6--Supplemental Figure 2
iso31 control	PMID: 15238529	lab-generated allele	iso31 background	panels A-F
elav-Gal4 (Chr2)	Bloomington	#8765	iso31 background	panels A-F
UAS-Dicer (Chr2)	Bloomington	#25750	mixed iso31 / stock center	panels A-B
UAS-atg5 RNAi	Bloomington	#27551	mixed iso31 / stock center	panels A,C,E
UAS-atg7 RNAi	Bloomington	#27707	mixed iso31 / stock center	panels B,D,F
argus	novel EMS allele	lab-generated allele	iso31 background (5X)	panels C-F
Figure 7--Supplemental Figure 1
nsyb-geneswitch (Chr 3)	PMID: 29590612	made in-lab by Paula Haynes	iso31 background	panels A-E
actingeneswitch (Chr 3)	PMID: 16269336	gift from Ken Irvine	iso31 background	panels F-P
UAS-Dicer2 (Chr2)	Vienna	#60008	w1118	panels A-P
assorted autophagy RNAi alleles	see Supplemental File 3	see Supplemental File 3	stock center backgrounds	panels A-P
Figure 7--Supplemental Figure 2
nsyb-geneswitch (Chr 3)	PMID: 29590612	made in-lab by Paula Haynes	iso31 background	panels A-E,G-K
actingeneswitch (Chr 3)	PMID: 16269336	gift from Ken Irvine	iso31 background	panels F,L-X
UAS-Dicer2 (Chr2)	Vienna	#60008	w1118	panels A-X
atg1 RNAi#1	Bloomington	#35177	iso31 background (5X)	panel A-F
atg1 RNAi#4	Vienna	#330433	iso31 background (5X)	panel G-L
atg8b RNAi#1	Bloomington	#27554	iso31 background (5X)	panel M-R
atg8b RNAi#2	Vienna	#101922	iso31 background (5X)	panel S-X
Figure 8--Supplemental Figure 1
elav-Gal4 (Chr2)	Bloomington	#8765	iso31 background	panels A-E
UAS-GFP-mCherry-atg8a	Bloomington	#37749	iso31 background (5X)	panels A-E

## Sheet: Primers Used
Argus SNP Mapping: SNP19M
Forward	5’ CTATCGGCCTATCTCTACCCTGG 3’
Reverse	5’ GCTCAGAACTATCAACCGTCAG 3’
Argus SNP Mapping: SNP24M
Forward	5’ GTTCCATAAGCCGCCCACTATATTC 3’
Reverse	5’ AAACAATGTGCCCTACCACC 3’
Aus2kGal4 Primers
Forward	5’ GTATGTGTTTAGGTATCGCGTG 3’
Reverse	5’ CCCGTTCTTCTTGTTGTCGTTGTC 3’
UAS-aus Primers
Forward	5’ CACATCAGCAACCAATGCAGG 3’
Reverse	5’GTTCCTGCCACTTGTTGTCC 3’
CG16791 / aus CRISPR gRNA Sequences
Forward	5’ GCGCTGCGGTCATACTGCAG 3’
Reverse	5' GAATTGATACAACTGACATA 3'
CG16791 / aus CRISPR Amplification Primers
Forward	5’ TATATAGGAAAGATATCCGGGTGAACTTCGCGCTGCGGTCATACTGCAGGTTTTAGAGCTAGAAATAGCAAG 3’
Reverse	5’ ATTTTAACTTGCTATTTCTAGCTCTAAAACtatgtcagttgtatcaattcGACGTTAAATTGAAAATAGGTC 3’
CG16791 / aus CRISPR Verification Primers
Forward	5’ GACACAGCGCGTACGTCCTTCG 3’
Reverse	5’ AACAACTCTCAGGCTCCAGG 3’
CG16791 / aus CRISPR 5' Arm Cloning Primers
Forward	5’ATAACACCTGCAAAATCGCACTTTCTAGTTTAATACTCCCAG 3’
Reverse	5’ ATAACACCTGCAAAACTACTTTTCGATACGGTACGGTAAACGAATTCGCCTCCGAGGGATTGTATCTCAGCGCTGCAGTATGACCGCAGC 3’	(Note: underlined base adjusted to eliminate cas9 cleavage site.)
CG16791 / aus CRISPR 3' Arm Cloning Primers
Forward	5’ ATAAGCTCTTCATATgtttgtacacacaaaaaatttgg 3’
Reverse	5’ ATAAGCTCTTCAGACacaactacccagctacccaac 3’
CG16791 / aus CRISPR 3' Arm PAM-Elimination Primers
Forward	5’ cttttaatattaagcttatgtcagttg 3’
Reverse	5’ caactgacataagcttaatattaaaag 3’
dsRed Probe Amplification Primers
Forward	5’ AGAAGACTATGGGCTGGGAG 3’
Reverse	5’ ACCGTTAGACACCGCTTGGAG 3’
Atg1 qPCR Primers
Forward	5' ACTACGCACTGGATATGTGCC 3'
Reverse	5' GCTCTATCCGCCCGAGTAAC 3'
Atg8a qPCR Primers
Forward	5' AAGTACCTGGTGCCTTCCGA 3'
Reverse	5' TCCTCCTCGTGATGTTCCTGG 3'
alpha-Tubulin qPCR Primers
Forward	5' CGTCTGGACCACAAGTTCGA 3'
Reverse	5' CCTCCATACCCTCACCAACGT 3'
