# Supplementary material for: Short and long sleeping mutants reveal links between sleep and macroautophagy
Source: eLife. 2021 Jun 4;10:e64140. doi: 10.7554/eLife.64140 (PMC8177895; doi:10.7554/eLife.64140)
Supplement: Supplementary file 2. — An unbiased ProDom analysis of the full-length CG16791, Isoform A protein sequence identified a number of candidate transmembrane domains. Validation with TMPred produced a similar 5-transmembrane best-fit topological prediction for all naturally occurring isoforms of CG16791, as well as our UAS-aus construct protein product. Deep-Loc-1.0 predicted the cell membrane as the most likely initial insertion site for all of these same CG16791 sequences, with the endoplasmic reticulum and Golgi apparatus as possible alternative insertion sites. [file elife-64140-supp2.xlsx]

## Sheet: Sheet1
Table S1
ExPASy ProDom (E=0.01 Cutoff)	CG16791 IsoformA (NCBI)
uncharacterized	13 possible sequences
transmembrane	8 possible sequences
transmembrane, leucine-rich	1 possible sequence
ExPASy TMpred (>500 Score Cutoff)	CG16791 IsoformA (NCBI)	CG16791 IsoformB (NCBI)	CG16791 IsoformC (NCBI)	CG16791 IsoformD (NCBI)	UAS-aus Protein Sequence
Best-Fit Model	5-transmembrane protein	5-transmembrane protein	5-transmembrane protein	5-transmembrane protein	5-transmembrane protein
DeepLoc-1.0	CG16791 IsoformA (NCBI)	CG16791 IsoformB (NCBI)	CG16791 IsoformC (NCBI)	CG16791 IsoformD (NCBI)	UAS-aus Protein Sequence
Cell Membrane	0.777	0.7441	0.7633	0.6916	0.6419
ER	0.187	0.1843	0.1934	0.211	0.2017
Golgi	0.028	0.0572	0.0356	0.0846	0.0509
Plastids	<1%	<1%	<1%	<1%	0.0511
Lysosome	<1%	0.0126	<1%	<1%	0.0187
Mitochondria	<1%	<1%	<1%	<1%	0.0182
Nucleus	<1%	<1%	<1%	<1%	0.0107
Peroxisome	<1%	<1%	<1%	<1%	<1%
Cytoplasm	<1%	<1%	<1%	<1%	<1%
ECM	<1%	<1%	<1%	<1%	<1%
