# Supplementary material for: Short and long sleeping mutants reveal links between sleep and macroautophagy
Source: eLife. 2021 Jun 4;10:e64140. doi: 10.7554/eLife.64140 (PMC8177895; doi:10.7554/eLife.64140)
Supplement: Supplementary file 3. — Tab 1: A list of all RNAi’s used in the screens, including unambiguous stock center IDs. Tab 2: First-pass medians, interquartiles, and n’s for total sleep in females on RU+ food for each nsybGS> dcr,RNAi cross with appropriate controls. Crosses that passed primary criterion are indicated, and annotated with whether they passed subsequent criteria or not and, if not, why. Tab 3: First-pass medians, interquartiles, and n’s for total sleep in females on RU+ food for each actinGS> dcr,RNAi cross with appropriate controls. Crosses that passed primary criterion are indicated, and annotated with whether they passed subsequent criteria or not and, if not, why. [file elife-64140-supp3.xlsx]

## Sheet: RNAi Lines Used
Our ID	Stock Center	Stock Center ID	Gene
aduk RNAi#1	Bloomington	#35187	CG8866 / Another Drosophila Unc-51-Like Kinase
aduk RNAi#2	Bloomington	#57530	CG8866 / Another Drosophila Unc-51-Like Kinase
aduk RNAi#3	Vienna	#103725	CG8866 / Another Drosophila Unc-51-Like Kinase
aduk RNAi#4	Vienna	#44859	CG8866 / Another Drosophila Unc-51-Like Kinase
ampk RNAi#1	Vienna	#1827	CG3051 / AMP-activated protein kinase α subunit
ampk RNAi#2	Bloomington	#35137	CG3051 / AMP-activated protein kinase α subunit
ampk RNAi#3	Bloomington	#25931	CG3051 / AMP-activated protein kinase α subunit
atf6 RNAi#1	Bloomington	#26211	CG3136 / Atf6
atf6 RNAi#2	Vienna	#330216	CG3136 / Atf6
atf6 RNAi#3	Vienna	#36504	CG3136 / Atf6
atg1 RNAi#1	Bloomington	#35177	CG10967 / Autophagy-related 1
atg1 RNAi#2	Bloomington	#26731	CG10967 / Autophagy-related 1
atg1 RNAi#3	Vienna	#16133	CG10967 / Autophagy-related 1
atg1 RNAi#4	Vienna	#330433	CG10967 / Autophagy-related 1
atg3 RNAi#1	Vienna	#101364	CG6877 / Autophagy-related 3
atg3 RNAi#2	Bloomington	#34359	CG6877 / Autophagy-related 3
atg3 RNAi#3	Vienna	#22455	CG6877 / Autophagy-related 3
atg4a RNAi#1	Bloomington	#44421	CG4428 / Autophagy-related 4a
atg4a RNAi#2	Bloomington	#35740	CG4428 / Autophagy-related 4a
atg4a RNAi#3	Vienna	#107317	CG4428 / Autophagy-related 4a
atg4b RNAi#1	Bloomington	#56046	CG6194 / Autophagy-related 4b
atg4b RNAi#2	Vienna	#108299	CG6194 / Autophagy-related 4b
atg4b RNAi#3	Vienna	#22294	CG6194 / Autophagy-related 4b
atg5 RNAi#1	Bloomington	#27551	CG1643 / Autophagy-related 5
atg5 RNAi#2	Bloomington	#34899	CG1643 / Autophagy-related 5
atg5 RNAi#3	Vienna	#104461	CG1643 / Autophagy-related 5
atg5 RNAi#4	Vienna	#330300	CG1643 / Autophagy-related 5
atg6 RNAi#1	Bloomington	#35741	CG5429 / Autophagy-related 6
atg6 RNAi#2	Vienna	#110197	CG5429 / Autophagy-related 6
atg6 RNAi#3	Bloomington	#28060	CG5429 / Autophagy-related 6
atg7 RNAi#1	Bloomington	#27707	CG5489 / Autophagy-related 7
atg7 RNAi#2	Bloomington	#34369	CG5489 / Autophagy-related 7
atg7 RNAi#3	Vienna	#45558	CG5489 / Autophagy-related 7
atg7 RNAi#4	Vienna	#27432	CG5489 / Autophagy-related 7
atg7 RNAi#5	Vienna	#45560	CG5489 / Autophagy-related 7
atg7 RNAi#6	Vienna	#45561	CG5489 / Autophagy-related 7
atg8a RNAi#1	Bloomington	#58309	CG32672 / Autophagy-related 8a
atg8a RNAi#2	Bloomington	#34340	CG32672 / Autophagy-related 8a
atg8a RNAi#3	Vienna	#109654	CG32672 / Autophagy-related 8a
atg8a RNAi#4	Vienna	#43097	CG32672 / Autophagy-related 8a
atg8a RNAi#5	Vienna	#43096	CG32672 / Autophagy-related 8a
atg8b RNAi#1	Bloomington	#27554	CG12334 / Autophagy-related 8b
atg8b RNAi#2	Vienna	#101922	CG12334 / Autophagy-related 8b
atg8b RNAi#3	Bloomington	#34900	CG12334 / Autophagy-related 8b
atg9 RNAi#1	Bloomington	#34901	CG3615 / Autophagy-related 9
atg9 RNAi#2	Bloomington	#28055	CG3615 / Autophagy-related 9
atg9 RNAi#3	Vienna	#330100	CG3615 / Autophagy-related 9
atg9 RNAi#4	Vienna	#10045	CG3615 / Autophagy-related 9
atg10 RNAi#1	Bloomington	#40859	CG12821 / Autophagy-related 10
atg10 RNAi#2	Vienna	#106317	CG12821 / Autophagy-related 10
atg10 RNAi#3	Vienna	#330415	CG12821 / Autophagy-related 10
atg12 RNAi#1	Bloomington	#34675	CG10861 / Autophagy-related 12
atg12 RNAi#2	Bloomington	#27552	CG10861 / Autophagy-related 12
atg12 RNAi#3	Vienna	#29791	CG10861 / Autophagy-related 12
atg13 RNAi#1	Bloomington	#40861	CG7331 / Autophagy-related 13
atg13 RNAi#2	Vienna	#27955	CG7331 / Autophagy-related 13
atg13 RNAi#3	Vienna	#103381	CG7331 / Autophagy-related 13
atg14 RNAi#1	Bloomington	#55398	CG11877 / Autophagy-related 14
atg14 RNAi#2	Bloomington	#40858	CG11877 / Autophagy-related 14
atg14 RNAi#3	Vienna	#108559	CG11877 / Autophagy-related 14
atg14 RNAi#4	Vienna	#49372	CG11877 / Autophagy-related 14
atg16 RNAi#1	Bloomington	#58244	CG31033 / Autophagy-related 16
atg16 RNAi#2	Bloomington	#34358	CG31033 / Autophagy-related 16
atg16 RNAi#3	Vienna	#105993	CG31033 / Autophagy-related 16
atg16 RNAi#4	Vienna	#25651	CG31033 / Autophagy-related 16
atg16 RNAi#5	Vienna	#25652	CG31033 / Autophagy-related 16
atg17 RNAi#1	Bloomington	#36918	CG1347 / Autophagy-related 17
atg17 RNAi#2	Vienna	#104864	CG1347 / Autophagy-related 17
atg101 RNAi#1	Bloomington	#34360	CG7053 / Autophagy-related 101
atg101 RNAi#2	Vienna	#106176	CG7053 / Autophagy-related 101
atg101 RNAi#3	Vienna	#27815	CG7053 / Autophagy-related 101
bip RNAi#1	Vienna	#14882	CG4147 / BiP / Hsc70-3
bip RNAi#2	Vienna	#101766	CG4147 / BiP / Hsc70-3
bip RNAi#3	Bloomington	#32402	CG4147 / BiP / Hsc70-3
bnip3 RNAi#1	Vienna	#9847	CG5059 / Bnip3
bnip3 RNAi#2	Vienna	#107493	CG5059 / Bnip3
bnip3 RNAi#3	Bloomington	#42494	CG5059 / Bnip3
cg43367 RNAi#1	Bloomington	#42574	CG43367
cg43367 RNAi#2	Vienna	#32175	CG43367
cg43367 RNAi#3	Vienna	#107981	CG43367
cg43367 RNAi#4	Vienna	#105590	CG43367
daor RNAi#1	Bloomington	#57770	CG11347 / diabetes and obesity related
daor RNAi#2	Bloomington	#60389	CG11347 / diabetes and obesity related
dor RNAi#1	Vienna	#107053	CG3093 / deep orange
dor RNAi#2	Vienna	#33733	CG3093 / deep orange
dram RNAi#1	Vienna	#6924	CG4025 / dram
dram RNAi#2	Vienna	#100288	CG4025 / dram
drpr RNAi#1	Vienna	#4833	CG2086 / draper
drpr RNAi#2	Vienna	#27086	CG2086 / draper
gyf RNAi#1	Bloomington	#28896	CG11148 / gigyf
gyf RNAi#2	Vienna	#105985	CG11148 / gigyf
gyf RNAi#3	Vienna	#18159	CG11148 / gigyf
ird1 RNAi#1	Bloomington	#34092	CG9746 / vaculoar protein sorting 15 / immune response deficient 1
ird1 RNAi#2	Bloomington	#35209	CG9746 / vaculoar protein sorting 15 / immune response deficient 1
ird1 RNAi#3	Bloomington	#57011	CG9746 / vaculoar protein sorting 15 / immune response deficient 1
ire1 RNAi#1	Vienna	#39562	CG4583 / inositol-requiring enzyme 1
ire1 RNAi#2	Vienna	#39561	CG4583 / inositol-requiring enzyme 1
lamp1 RNAi#1	Bloomington	#38355	CG3305 / lamp1
lamp1 RNAi#2	Bloomington	#38254	CG3305 / lamp1
lamp1 RNAi#3	Bloomington	#35675	CG3305 / lamp1
lamp1 RNAi#4	Bloomington	#55219	CG3305 / lamp1
lamp1 RNAi#5	Vienna	#7309	CG3305 / lamp1
lamp1 RNAi#6	Vienna	#7308	CG3305 / lamp1
lrrk2 RNAi#1	Vienna	#22139	CG5483 / leucine-rich repeat kinase 2
lrrk2 RNAi#2	Vienna	#105630	CG5483 / leucine-rich repeat kinase 2
mauve RNAi#1	Vienna	#109676	CG42863 / mauve
mauve RNAi#2	Vienna	#38567	CG42863 / mauve
mauve RNAi#3	Vienna	#105417	CG42863 / mauve
perk RNAi#1	Vienna	#16427	CG2087 / pancreatic eIF2alpha kinase
perk RNAi#2	Vienna	#110278	CG2087 / pancreatic eIF2alpha kinase
ref2p RNAi#1	Bloomington	#33978	CG10360 / refractory to sigma P
ref2p RNAi#2	Bloomington	#36111	CG10360 / refractory to sigma P
ref2p RNAi#3	Vienna	#108193	CG10360 / refractory to sigma P
rubicon RNAi#1	Vienna	#46140	CG12772 / rubicon
rubicon RNAi#2	Vienna	#109424	CG12772 / rubicon
rubicon RNAi#3	Bloomington	#43276	CG12772 / rubicon
rugose RNAi#1	Vienna	#51684	CG44835 / rugose
rugose RNAi#2	Vienna	#36404	CG44835 / rugose
starvin RNAi#1	Kyoto	#115336	CG32130 / starvin
starvin RNAi#2	Bloomington	#42564	CG32130 / starvin
starvin RNAi#3	Vienna	#34408	CG32130 / starvin
uvrag RNAi#1	Bloomington	#34368	CG6116 / UV-resistance associated gene
vamp7 RNAi#1	Vienna	#13317	CG1599 / vesicle-associated membrane protein 7
vamp7 RNAi#2	Vienna	#108733	CG1599 / vesicle-associated membrane protein 7
vps34 RNAi#1	Vienna	#100296	CG5373 / phosphatidylinositol 3-kinase 59F
vps34 RNAi#2	Vienna	#330123	CG5373 / phosphatidylinositol 3-kinase 59F
wacky RNAi#1	Vienna	#48307	CG8949 / wacky
wacky RNAi#2	Vienna	#107328	CG8949 / wacky
wacky RNAi#3	Vienna	#48305	CG8949 / wacky
wdr81 RNAi#1	Bloomington	#60363	CG6734 / WD repeat domain 81
wdr81 RNAi#2	Vienna	#106697	CG6734 / WD repeat domain 81
xbp1 RNAi#2	Bloomington	#36755	CG9415 / X-box binding protein 1
xbp1 RNAi#3	Vienna	#15347	CG9415 / X-box binding protein 1
xbp1 RNAi#4	Vienna	#109312	CG9415 / X-box binding protein 1
zonda RNAi#1	Vienna	#110620	CG5482 / zonda

## Sheet: NsybGS First-Pass
Primary Criterion: cross median is 2hrs or more higher or lower than both controls in initial run
Secondary Criterion: no opposite-phenotype RNAis for same gene
Tertiary Criterion: significantly higher or lower than both controls after re-run
Initial hit by primary criterion failed secondary or tertiary criteria
Cross Significantly Increases Sleep
Cross Significantly Decreases Sleep
Total Sleep (min)	Median	First Quartile	Third Quartile	First-Pass N
NsybGS Dicer aduk RNAi#1	866.75	810.5	969.75	16
Iso aduk RNAi#1	997	931.5	1078	15
NsybGS Dicer Iso	889	815.375	1012.5	16
NsybGS Dicer aduk RNAi#2	879	833	971.75	15
Iso aduk RNAi#2	1092	1027.75	1121.12	16
NsybGS Dicer Iso	889	815.375	1012.5	16
NsybGS Dicer aduk RNAi#3	990.5	903	1071	16
Iso aduk RNAi#3	904.5	798.25	963.25	15
NsybGS Dicer Iso	574	517.5	610.75	16
NsybGS Dicer aduk RNAi#4	708.5	649.375	751.25	14
Iso aduk RNAi#4	734.5	686.75	761.5	15
NsybGS Dicer Iso	657	550.25	820.25	16
NsybGS Dicer ampk RNAi#1	631	540	687.75	15
Iso ampk RNAi#1	706	638.625	737.25	16
NsybGS Dicer Iso	764	676.5	873.875	16
NsybGS Dicer ampk RNAi#2	824.5	614.25	1067	7
Iso ampk RNAi#2	825	782.375	895.125	8
NsybGS Dicer Iso	707.75	540.5	864.875	16
NsybGS Dicer ampk RNAi#3	792.5	690.875	829.25	6
Iso ampk RNAi#3	1001.5	909.625	1048.12	16
NsybGS Dicer Iso	705.5	595.5	817.25	15
NsybGS Dicer atf6 RNAi#1	757.75	632.5	865.5	16
Iso atf6 RNAi#1	831	715.25	896.125	16
NsybGS Dicer Iso	574	517.5	610.75	16
NsybGS Dicer atf6 RNAi#2	656	496.75	880	15
Iso atf6 RNAi#2	872	742.25	952	15
NsybGS Dicer Iso	775.5	718	921.125	16
NsybGS Dicer atf6 RNAi#3	834	718.25	939.25	15
Iso atf6 RNAi#3	877	765.5	948.25	16
NsybGS Dicer Iso	671.75	608.75	732.125	16
NsybGS Dicer atg1 RNAi#1	1066.75	965.875	1222.25	10
Iso atg1 RNAi#1	893	853.375	950.5	16
NsybGS Dicer Iso	747	670.5	918.5	15
NsybGS Dicer atg1 RNAi#2	1007.25	881.75	1109.88	16
Iso atg1 RNAi#2	1043.25	1026	1091	16
NsybGS Dicer Iso	747	670.5	918.5	15
NsybGS Dicer atg1 RNAi#3	627.5	566.125	696.125	16
Iso atg1 RNAi#3	742	668	784.375	16
NsybGS Dicer Iso	624	495.25	795	16
NsybGS Dicer atg1 RNAi#4	1118	1066	1188	6
Iso atg1 RNAi#4	868.25	724.25	932.875	16
NsybGS Dicer Iso	624	495.25	795	16
NsybGS Dicer atg3 RNAi#1	948.25	835.875	1026.88	16
Iso atg3 RNAi#1	957	865.125	994.375	16
NsybGS Dicer Iso	747	670.5	918.5	15
NsybGS Dicer atg3 RNAi#2	844	785.5	929	9
Iso atg3 RNAi#2	978.5	928	1044.25	16
NsybGS Dicer Iso	747	670.5	918.5	15
NsybGS Dicer atg3 RNAi#3	629	550.75	648	3
Iso atg3 RNAi#3	784.5	660.25	882	15
NsybGS Dicer Iso	624	495.25	795	16
NsybGS Dicer atg4a RNAi#1	1118.75	1045.38	1182	16
Iso atg4a RNAi#1	1066.25	1027.25	1110.75	16
NsybGS Dicer Iso	747	670.5	918.5	15
NsybGS Dicer atg4a RNAi#2	973.25	881.875	1035.38	16
Iso atg4a RNAi#2	1018.75	945.375	1079.12	16
NsybGS Dicer Iso	747	670.5	918.5	15
NsybGS Dicer atg4a RNAi#3	788	608.5	809.25	15
Iso atg4a RNAi#3	840.75	795.625	886	16
NsybGS Dicer Iso	747	670.5	918.5	15
NsybGS Dicer atg4b RNAi#1	906	735	1112.25	15
Iso atg4b RNAi#1	1008	937.75	1099.75	15
NsybGS Dicer Iso	867	747.25	967.5	15
NsybGS Dicer atg4b RNAi#2	1082.5	977.5	1136.25	15	failed secondary validation; NsybGS atg4b RNAi#3 cross was short-sleeping in first-pass run
Iso atg4b RNAi#2	962	894.25	1015.25	15
NsybGS Dicer Iso	867	747.25	967.5	15
NsybGS Dicer atg4b RNAi#3	468.25	421.375	613.375	14	failed secondary validation; NsybGS atg4b RNAi#2 cross was long-sleeping in first-pass run
Iso atg4b RNAi#3	700.5	626	855	15
NsybGS Dicer Iso	624	495.25	795	16
NsybGS Dicer atg5 RNAi#1	644.5	521.5	727.25	15	failed secondary validation; ActinGS atg5 RNAi#3 cross was long-sleeping in first-pass run
Iso atg5 RNAi#1	839	788.75	916	15
NsybGS Dicer Iso	867	747.25	967.5	15
NsybGS Dicer atg5 RNAi#2	825.5	730.5	871.25	15
Iso atg5 RNAi#2	858	803	917.75	15
NsybGS Dicer Iso	867	747.25	967.5	15
NsybGS Dicer atg5 RNAi#3	876.5	794.25	904.5	15
Iso atg5 RNAi#3	887	819.25	964.75	15
NsybGS Dicer Iso	867	747.25	967.5	15
NsybGS Dicer atg5 RNAi#4	624.5	555.25	696.75	7
Iso atg5 RNAi#4	756	633.25	800	15
NsybGS Dicer Iso	624	495.25	795	16
NsybGS Dicer atg6 RNAi#3	928	837.5	981.75	15
Iso atg6 RNAi#3	934.5	869.625	986.75	14
NsybGS Dicer Iso	867	747.25	967.5	15
NsybGS Dicer atg6 RNAi#1	789	707.5	823	13
Iso atg6 RNAi#1	852.75	815	887.75	16
NsybGS Dicer Iso	729.25	620.375	872.125	16
NsybGS Dicer atg6 RNAi#2	840	750.75	876.75	16
Iso atg6 RNAi#2	841	756.75	888.75	15
NsybGS Dicer Iso	729.25	620.375	872.125	16
NsybGS Dicer atg7 RNAi#1	895.75	851.875	960.875	16
Iso atg7 RNAi#1	908.25	851.125	951	16
NsybGS Dicer Iso	729.25	620.375	872.125	16
NsybGS Dicer atg7 RNAi#2	866	840	960.5	15
Iso atg7 RNAi#2	964.5	908.5	1037	11
NsybGS Dicer Iso	729.25	620.375	872.125	16
NsybGS Dicer atg7 RNAi#3	804.75	761.5	871	16
Iso atg7 RNAi#3	835.75	760.375	883.875	16
NsybGS Dicer Iso	729.25	620.375	872.125	16
NsybGS Dicer atg7 RNAi#4	731	596	814.25	11
Iso atg7 RNAi#4	835.75	680.25	896.875	16
NsybGS Dicer Iso	624	495.25	795	16
NsybGS Dicer atg7 RNAi#5	768	710.375	919.125	12
Iso atg7 RNAi#5	798.5	737.625	851.625	14
NsybGS Dicer Iso	624	495.25	795	16
NsybGS Dicer atg7 RNAi#6	963.5	876	1141.25	11
Iso atg7 RNAi#6	925.25	850	999.25	10
NsybGS Dicer Iso	538.5	474.75	637.125	16
NsybGS Dicer atg8a RNAi#1	699	630.5	797.25	15
Iso atg8a RNAi#1	831.5	826.875	874.625	10
NsybGS Dicer Iso	729.25	620.375	872.125	16
NsybGS Dicer atg8a RNAi#2	765	674.875	778.875	16
Iso atg8a RNAi#2	833.25	775.125	948.875	16
NsybGS Dicer Iso	729.25	620.375	872.125	16
NsybGS Dicer atg8a RNAi#3	676.5	596.875	763.625	16
Iso atg8a RNAi#3	700.5	662.75	776.5	16
NsybGS Dicer Iso	729.25	620.375	872.125	16
NsybGS Dicer atg8a RNAi#4	840	728.75	889	15
Iso atg8a RNAi#4	816	761.375	868	16
NsybGS Dicer Iso	618.25	528.375	712.25	16
NsybGS Dicer atg8a RNAi#5	728.75	706.375	880.5	16
Iso atg8a RNAi#5	948	882.25	987.25	15
NsybGS Dicer Iso	791.5	666.625	895	16
NsybGS Dicer atg8b RNAi#1	585.75	492.625	701.75	16	failed tertiary validation; not signficantly lower sleep in cross after second run
Iso atg8b RNAi#1	923	819	995.375	16
NsybGS Dicer Iso	729.25	620.375	872.125	16
NsybGS Dicer atg8b RNAi#2	748.5	650.375	932.625	16
Iso atg8b RNAi#2	720.5	631.5	774.5	16
NsybGS Dicer Iso	729.25	620.375	872.125	16
NsybGS Dicer atg8b RNAi#3	824	745.625	847.5	16
Iso atg8b RNAi#3	904	719.5	1001	13
NsybGS Dicer Iso	729.25	620.375	872.125	16
NsybGS Dicer atg9 RNAi#1	785.5	762	950.375	6
Iso atg9 RNAi#1	800.5	759.125	904.125	16
NsybGS Dicer Iso	573.5	507.625	676.625	16
NsybGS Dicer atg9 RNAi#2	639.75	596.625	740.125	16
Iso atg9 RNAi#2	926.25	843.125	998.75	16
NsybGS Dicer Iso	618.25	528.375	712.25	16
NsybGS Dicer atg9 RNAi#3	538.75	471	648.75	16
Iso atg9 RNAi#3	691.5	636.75	817.875	16
NsybGS Dicer Iso	573.5	507.625	676.625	16
NsybGS Dicer atg9 RNAi#4	879	812.5	990	15
Iso atg9 RNAi#4	862	753.25	910	15
NsybGS Dicer Iso	658.5	601.25	725.125	16
NsybGS Dicer atg10 RNAi#1	819.5	794.75	864.5	7
Iso atg10 RNAi#1	933.5	786	1042.5	16
NsybGS Dicer Iso	538.5	474.75	637.125	16
NsybGS Dicer atg10 RNAi#2	750.25	668.75	820.5	16
Iso atg10 RNAi#2	839	774.375	951.75	16
NsybGS Dicer Iso	573.5	507.625	676.625	16
NsybGS Dicer atg10 RNAi#3	1075.25	1024.62	1155.62	14
Iso atg10 RNAi#3	913	679.75	1024.25	15
NsybGS Dicer Iso	538.5	474.75	637.125	16
NsybGS Dicer atg12 RNAi#1	1063.5	951.875	1087.12	16
Iso atg12 RNAi#1	988.5	946.75	1025.5	16
NsybGS Dicer Iso	538.5	474.75	637.125	16
NsybGS Dicer atg12 RNAi#2	789.5	646.25	867.75	16
Iso atg12 RNAi#2	860	718	941.5	15
NsybGS Dicer Iso	573.5	507.625	676.625	16
NsybGS Dicer atg12 RNAi#3	659.25	538.625	704	16
Iso atg12 RNAi#3	836.75	692.625	885.625	16
NsybGS Dicer Iso	618.25	528.375	712.25	16
NsybGS Dicer atg13 RNAi#3	889.25	828.75	1050.62	16
Iso atg13 RNAi#3	913.5	870.25	974.375	16
NsybGS Dicer Iso	775.5	718	921.125	16
NsybGS Dicer atg13 RNAi#1	803.75	648.875	907.5	16
Iso atg13 RNAi#1	966.75	906.5	1025.75	16
NsybGS Dicer Iso	775.5	718	921.125	16
NsybGS Dicer atg13 RNAi#2	692.5	599.375	818.875	16
Iso atg13 RNAi#2	759.75	720.375	867.875	16
NsybGS Dicer Iso	775.5	718	921.125	16
NsybGS Dicer atg14 RNAi#1	802	738.5	901	15
Iso atg14 RNAi#1	1020.5	980	1070.75	16
NsybGS Dicer Iso	775.5	718	921.125	16
NsybGS Dicer atg14 RNAi#2	560.5	469	649.75	11
Iso atg14 RNAi#2	810.25	713.625	866.25	16
NsybGS Dicer Iso	573.5	507.625	676.625	16
NsybGS Dicer atg14 RNAi#3	758.75	621.875	820.625	16
Iso atg14 RNAi#3	785.5	670.375	873	16
NsybGS Dicer Iso	573.5	507.625	676.625	16
NsybGS Dicer atg14 RNAi#4	724.25	586.25	878.5	14
Iso atg14 RNAi#4	642.75	554.875	748.375	16
NsybGS Dicer Iso	775.5	718	921.125	16
NsybGS Dicer atg16 RNAi#1	706.5	568.75	771	16
Iso atg16 RNAi#1	950	860.25	1054.75	15
NsybGS Dicer Iso	573.5	507.625	676.625	16
NsybGS Dicer atg16 RNAi#2	918	773	985.5	15
Iso atg16 RNAi#2	951.25	930.125	1007	16
NsybGS Dicer Iso	775.5	718	921.125	16
NsybGS Dicer atg16 RNAi#3	814.5	738	887.75	16
Iso atg16 RNAi#3	856	737.25	983.25	15
NsybGS Dicer Iso	574	517.5	610.75	16
NsybGS Dicer atg16 RNAi#4	554.5	425	663.75	15
Iso atg16 RNAi#4	757	696.25	809.75	15
NsybGS Dicer Iso	618.25	528.375	712.25	16
NsybGS Dicer atg16 RNAi#5	541	409.25	597.625	16
Iso atg16 RNAi#5	925	805.125	1009.25	16
NsybGS Dicer Iso	618.25	528.375	712.25	16
NsybGS Dicer atg17 RNAi#1	980.25	908.625	1042.5	16
Iso atg17 RNAi#1	949	866.125	1011	16
NsybGS Dicer Iso	574	517.5	610.75	16
NsybGS Dicer atg17 RNAi#2	938	816.625	1087.62	10
Iso atg17 RNAi#2	957	920.75	1002.5	15
NsybGS Dicer Iso	889	815.375	1012.5	16
NsybGS Dicer atg101 RNAi#1	657.25	606	787.5	16
Iso atg101 RNAi#1	802.25	705.875	949.25	16
NsybGS Dicer Iso	574	517.5	610.75	16
NsybGS Dicer atg101 RNAi#2	718.25	662.25	766.125	16
Iso atg101 RNAi#2	793.75	756.375	840.5	16
NsybGS Dicer Iso	574	517.5	610.75	16
NsybGS Dicer atg101 RNAi#3	852.5	725.625	961.875	14
Iso atg101 RNAi#3	904.5	774.625	1002	16
NsybGS Dicer Iso	775.5	718	921.125	16
NsybGS Dicer bip RNAi#1	731.5	636.25	805.75	15
Iso bip RNAi#1	671.25	552.625	744.25	16
NsybGS Dicer Iso	574	517.5	610.75	16
NsybGS Dicer bip RNAi#2	861	822.625	913.75	16
Iso bip RNAi#2	876.5	786.75	958	16
NsybGS Dicer Iso	574	517.5	610.75	16
NsybGS Dicer bip RNAi#3	1306.25	1289.5	1329.5	4
Iso bip RNAi#3	915.25	888.125	963.25	14
NsybGS Dicer Iso	705.5	595.5	817.25	15
NsybGS Dicer bnip3 RNAi#1	862.25	779.375	910	16
Iso bnip3 RNAi#1	923.5	850.5	1009.75	16
NsybGS Dicer Iso	711	666.875	750.5	16
NsybGS Dicer bnip3 RNAi#2	977	933.375	1104.25	16
Iso bnip3 RNAi#2	923.5	883.75	991.25	15
NsybGS Dicer Iso	711	666.875	750.5	16
NsybGS Dicer bnip3 RNAi#3	885.25	857.25	1002.62	16
Iso bnip3 RNAi#3	1072.75	1036.88	1103.62	16
NsybGS Dicer Iso	711	666.875	750.5	16
NsybGS Dicer cg43367 RNAi#1	777.5	700	941.25	11
Iso cg43367 RNAi#1	931.25	884.875	1050	16
NsybGS Dicer Iso	794.25	653.875	864.375	16
NsybGS Dicer cg43367 RNAi#2	877.5	789	913.25	15
Iso cg43367 RNAi#2	906.75	849.125	927.75	14
NsybGS Dicer Iso	798.5	625	855.5	13
NsybGS Dicer cg43367 RNAi#3	929.25	911.5	1026	16
Iso cg43367 RNAi#3	906.5	865.875	935.875	16
NsybGS Dicer Iso	889	815.375	1012.5	16
NsybGS Dicer cg43367 RNAi#4	863	814.375	952.875	16
Iso cg43367 RNAi#4	895.75	770.625	969.625	16
NsybGS Dicer Iso	889	815.375	1012.5	16
NsybGS Dicer daor RNAi#1	1173	1116.5	1197.25	7
Iso daor RNAi#1	963.5	875.75	1014.25	15
NsybGS Dicer Iso	538.5	474.75	637.125	16
NsybGS Dicer daor RNAi#2	872.5	764.5	949.875	16
Iso daor RNAi#2	922.25	856.75	974.25	16
NsybGS Dicer Iso	538.5	474.75	637.125	16
NsybGS Dicer dor RNAi#1	766	693	915.125	16
Iso dor RNAi#1	781	725.75	946	15
NsybGS Dicer Iso	574	517.5	610.75	16
NsybGS Dicer dor RNAi#2	737	645.625	837.75	16
Iso dor RNAi#2	829	755.25	917.5	15
NsybGS Dicer Iso	574	517.5	610.75	16
NsybGS Dicer dram RNAi#1	731	630.5	862	15
Iso dram RNAi#1	727.5	627.75	778.5	15
NsybGS Dicer Iso	705.5	595.5	817.25	15
NsybGS Dicer dram RNAi#2	765.5	719.75	850.25	15
Iso dram RNAi#2	713.5	622.375	832.5	16
NsybGS Dicer Iso	574	517.5	610.75	16
NsybGS Dicer drpr RNAi#1	822.25	769.375	893.5	6
Iso drpr RNAi#1	848.75	773.125	886.375	16
NsybGS Dicer Iso	705.5	595.5	817.25	15
NsybGS Dicer drpr RNAi#2	705.5	541.25	740	11
Iso drpr RNAi#2	720	596.75	800.5	15
NsybGS Dicer Iso	705.5	595.5	817.25	15
NsybGS Dicer gyf RNAi#1	871.5	741	942	16
Iso gyf RNAi#1	1022.5	893.125	1105.12	16
NsybGS Dicer Iso	705.5	595.5	817.25	15
NsybGS Dicer gyf RNAi#2	1068.5	1030.12	1170.75	8
Iso gyf RNAi#2	950	866.125	1028.62	16
NsybGS Dicer Iso	798.5	625	855.5	13
NsybGS Dicer gyf RNAi#3	693.5	621	740.75	16
Iso gyf RNAi#3	870.5	824.625	909.5	16
NsybGS Dicer Iso	671.75	608.75	732.125	16
NsybGS Dicer ird1 RNAi#1	953.25	835.875	1056.5	16
Iso ird1 RNAi#1	860.5	798.375	910.625	16
NsybGS Dicer Iso	794.25	653.875	864.375	16
NsybGS Dicer ird1 RNAi#2	839.5	792.75	896.625	16
Iso ird1 RNAi#2	958.5	888.5	1018.25	15
NsybGS Dicer Iso	794.25	653.875	864.375	16
NsybGS Dicer ird1 RNAi#3	888.5	798.5	952.375	16
Iso ird1 RNAi#3	986	866.375	1047.38	16
NsybGS Dicer Iso	794.25	653.875	864.375	16
NsybGS Dicer ire1 RNAi#1	764.25	662.625	860.625	16
Iso ire1 RNAi#1	869	792.125	997	8
NsybGS Dicer Iso	574	517.5	610.75	16
NsybGS Dicer ire1 RNAi#2	775	720.25	809.25	16
Iso ire1 RNAi#2	850.5	824.5	892.75	16
NsybGS Dicer Iso	574	517.5	610.75	16
NsybGS Dicer lamp1 RNAi#1	1014.5	952.5	1056.5	13
Iso lamp1 RNAi#1	1012	940.5	1025.5	9
NsybGS Dicer Iso	538.5	474.75	637.125	16
NsybGS Dicer lamp1 RNAi#2	1084.5	961.5	1105	9
Iso lamp1 RNAi#2	1021.5	951.75	1040.62	10
NsybGS Dicer Iso	538.5	474.75	637.125	16
NsybGS Dicer lamp1 RNAi#3	835.5	772.875	908.5	4
Iso lamp1 RNAi#3	957.25	892.625	995.875	16
NsybGS Dicer Iso	538.5	474.75	637.125	16
NsybGS Dicer lamp1 RNAi#4	891.5	831	924.5	13
Iso lamp1 RNAi#4	950.75	914.5	1041.5	16
NsybGS Dicer Iso	538.5	474.75	637.125	16
NsybGS Dicer lamp1 RNAi#5	833	764.5	959	15
Iso lamp1 RNAi#5	818	668.75	887.75	15
NsybGS Dicer Iso	798.5	625	855.5	13
NsybGS Dicer lamp1 RNAi#6	712.25	525.25	816.5	16
Iso lamp1 RNAi#6	867	779	962.75	16
NsybGS Dicer Iso	657	550.25	820.25	16
NsybGS Dicer lrrk2 RNAi#1	inadvertently omitted from screen
Iso lrrk2 RNAi#1
NsybGS Dicer Iso
NsybGS Dicer lrrk2 RNAi#2	866	807.75	969.5	15
Iso lrrk2 RNAi#2	930.25	806.875	954.375	16
NsybGS Dicer Iso	711	666.875	750.5	16
NsybGS Dicer mauve RNAi#1	903.5	830.875	1035.12	16
Iso mauve RNAi#1	964	869.5	1026.75	15
NsybGS Dicer Iso	798.5	625	855.5	13
NsybGS Dicer mauve RNAi#2	836	770.875	919.625	16
Iso mauve RNAi#2	878.5	798.125	944.875	14
NsybGS Dicer Iso	606.75	547	625.125	16
NsybGS Dicer mauve RNAi#3	825	772	884.75	15
Iso mauve RNAi#3	937	839.625	998.5	16
NsybGS Dicer Iso	671.75	608.75	732.125	16
NsybGS Dicer perk RNAi#1	736.25	626.625	853.75	16
Iso perk RNAi#1	870.75	781	920.25	16
NsybGS Dicer Iso	711	666.875	750.5	16
NsybGS Dicer perk RNAi#2	inadvertently omitted from screen
Iso perk RNAi#2
NsybGS Dicer Iso
NsybGS Dicer ref2p RNAi#1	865	689.5	975.75	16
Iso ref2p RNAi#1	1023	851.25	1053.25	16
NsybGS Dicer Iso	876	767.25	966.25	16
NsybGS Dicer ref2p RNAi#2	943.5	808.5	1060	16
Iso ref2p RNAi#2	1207.5	1146.75	1231.5	16
NsybGS Dicer Iso	876	767.25	966.25	16
NsybGS Dicer ref2p RNAi#3	776.5	687.5	805.5	5
Iso ref2p RNAi#3	933	919.625	988.75	16
NsybGS Dicer Iso	711	666.875	750.5	16
NsybGS Dicer rubicon RNAi#1	956.5	914	1056.5	9	failed tertiary validation; not signficantly higher sleep in cross after second run
Iso rubicon RNAi#1	795.5	715.5	962.75	11
NsybGS Dicer Iso	581	541.75	794.5	15
NsybGS Dicer rubicon RNAi#2	754.75	748.75	758.25	4
Iso rubicon RNAi#2	669.75	528	756.125	10
NsybGS Dicer Iso	581	541.75	794.5	15
NsybGS Dicer rubicon RNAi#3	931	869.625	963.375	4
Iso rubicon RNAi#3	994	909	1021.25	15
NsybGS Dicer Iso	581	541.75	794.5	15
NsybGS Dicer rugose RNAi#1	886	669.25	1002.25	15
Iso rugose RNAi#1	859.5	724.75	929	15
NsybGS Dicer Iso	798.5	625	855.5	13
NsybGS Dicer rugose RNAi#2	732	622	936	13
Iso rugose RNAi#2	697.5	655.5	808.5	9
NsybGS Dicer Iso	798.5	625	855.5	13
NsybGS Dicer starvin RNAi#1	864	744.625	962.75	16
Iso starvin RNAi#1	933.5	854.5	1020.88	16
NsybGS Dicer Iso	671.75	608.75	732.125	16
NsybGS Dicer starvin RNAi#2	1006	929	1088.5	15
Iso starvin RNAi#2	916	860.125	988.875	16
NsybGS Dicer Iso	631	538.375	711.625	16
NsybGS Dicer starvin RNAi#3	902	810.5	967.5	13
Iso starvin RNAi#3	916.75	863.375	1018.88	16
NsybGS Dicer Iso	711	666.875	750.5	16
NsybGS Dicer uvrag RNAi#1	759.75	649.375	895.875	16
Iso uvrag RNAi#1	877.75	803.5	1008	16
NsybGS Dicer Iso	631	538.375	711.625	16
NsybGS Dicer vamp7 RNAi#1	698	642	895.375	16
Iso vamp7 RNAi#1	835.75	771.25	994	10
NsybGS Dicer Iso	705.5	595.5	817.25	15
NsybGS Dicer vamp7 RNAi#2	980	912.5	1042.5	9
Iso vamp7 RNAi#2	881.5	790.375	922.375	14
NsybGS Dicer Iso	705.5	595.5	817.25	15
NsybGS Dicer vps34 RNAi#1	859	778.25	951.25	15
Iso vps34 RNAi#1	926	854.75	1011	15
NsybGS Dicer Iso	671.75	608.75	732.125	16
NsybGS Dicer vps34 RNAi#2	734.75	698.75	767	16
Iso vps34 RNAi#2	860	819.375	946.375	16
NsybGS Dicer Iso	671.75	608.75	732.125	16
NsybGS Dicer wacky RNAi#1	770.75	685.75	853.25	4
Iso wacky RNAi#1	633.75	514.375	798.625	14
NsybGS Dicer Iso	798.5	625	855.5	13
NsybGS Dicer wacky RNAi#2	907.25	796	957	16
Iso wacky RNAi#2	886.5	832.25	1006.38	16
NsybGS Dicer Iso	889	815.375	1012.5	16
NsybGS Dicer wacky RNAi#3	650	554.5	812.5	9
Iso wacky RNAi#3	1002	936.25	1063.5	16
NsybGS Dicer Iso	618.25	528.375	712.25	16
NsybGS Dicer wdr81 RNAi#1	832.75	687.625	996	16
Iso wdr81 RNAi#1	1001.5	882	1030.25	15
NsybGS Dicer Iso	831.5	625	969.75	15
NsybGS Dicer wdr81 RNAi#2	884.25	862.125	956.875	8
Iso wdr81 RNAi#2	949.5	904.875	1009.38	16
NsybGS Dicer Iso	831.5	625	969.75	15
NsybGS Dicer xbp1 RNAi#2	733.25	646.5	799.875	16
Iso xbp1 RNAi#2	800	722.75	843.875	16
NsybGS Dicer Iso	631	538.375	711.625	16
NsybGS Dicer xbp1 RNAi#3	697.75	655	762.125	16
Iso xbp1 RNAi#3	809.5	707.375	933.125	16
NsybGS Dicer Iso	889	815.375	1012.5	16
NsybGS Dicer xbp1 RNAi#4	916	811.5	978	15
Iso xbp1 RNAi#4	802.5	739.25	903.875	16
NsybGS Dicer Iso	711	666.875	750.5	16
NsybGS Dicer zonda RNAi#1	1043.5	928.75	1093.5	15	failed tertiary validation; not signficantly higher sleep in cross after second run
Iso zonda RNAi#1	891	809.5	945.5	16
NsybGS Dicer Iso	889	815.375	1012.5	16

## Sheet: ActinGS First-Pass
Primary Criterion: cross median is 2hrs or more higher or lower than both controls in initial run
Secondary Criterion: no opposite-phenotype RNAis for same gene
Tertiary Criterion: significantly higher or lower than both controls after re-run
Initial hit by primary criterion failed secondary or tertiary criteria
Cross Significantly Increases Sleep
Cross Significantly Decreases Sleep
Total Sleep (min)	Median	First Quartile	Third Quartile	First-Pass N
ActinGS Dicer aduk RNAi#1	1005.75	974.5	1072.88	16
Iso aduk RNAi#1	1101.5	1080	1140.25	15
ActinGS Dicer Iso	676.5	552.25	765.625	16
ActinGS Dicer aduk RNAi#2	1071	1002.25	1142.5	15
Iso aduk RNAi#2	1043.75	1003.25	1093.25	16
ActinGS Dicer Iso	676.5	552.25	765.625	16
ActinGS Dicer aduk RNAi#3	1035.5	987.5	1115.75	16
Iso aduk RNAi#3	877	805.75	941.75	15
ActinGS Dicer Iso	676.5	552.25	765.625	16
ActinGS Dicer aduk RNAi#4	789	696	811.25	14
Iso aduk RNAi#4	734.5	686.75	761.5	15
ActinGS Dicer Iso	791.5	592.875	911.125	16
ActinGS Dicer ampk RNAi#1	792.5	781	901.75	11
Iso ampk RNAi#1	706	638.625	737.25	16
ActinGS Dicer Iso	868.5	797.875	964	16
ActinGS Dicer ampk RNAi#2	lethal by end of recording, excluded from screen
Iso ampk RNAi#2	825	782.375	895.125	8
ActinGS Dicer Iso	755	585.625	820	14
ActinGS Dicer ampk RNAi#3	lethal cross, excluded from screen
Iso ampk RNAi#3
ActinGS Dicer Iso
ActinGS Dicer atf6 RNAi#1	1112.5	1015.25	1129	15
Iso atf6 RNAi#1	837.5	791.375	1012.75	16
ActinGS Dicer Iso	676.5	552.25	765.625	16
ActinGS Dicer atf6 RNAi#2	954	844.75	1009	15
Iso atf6 RNAi#2	890.5	815.5	955.5	13
ActinGS Dicer Iso	676.5	552.25	765.625	16
ActinGS Dicer atf6 RNAi#3	854	762.5	1001.75	15
Iso atf6 RNAi#3	890	794.5	958	16
ActinGS Dicer Iso	676.5	552.25	765.625	16
ActinGS Dicer atg1 RNAi#1	887.5	862	1086.5	5
Iso atg1 RNAi#1	847.5	799	902.375	6
ActinGS Dicer Iso	720.25	631.75	815.875	16
ActinGS Dicer atg1 RNAi#2	lethal cross, excluded from screen
Iso atg1 RNAi#2
ActinGS Dicer Iso
ActinGS Dicer atg1 RNAi#3	791.25	723.375	917.5	16
Iso atg1 RNAi#3	847	761.125	933.5	16
ActinGS Dicer Iso	930.25	872.125	1026.25	16
ActinGS Dicer atg1 RNAi#4	lethal cross, excluded from screen				(note: after iso31 backcross of the atg1 RNAi#4 allele, this cross became marginally viable, allowing us to later assess RNAi efficiency with the actinGS driver)
Iso atg1 RNAi#4
ActinGS Dicer Iso
ActinGS Dicer atg3 RNAi#1	993.5	799.5	1125.25	15
Iso atg3 RNAi#1	948	861	1012.25	15
ActinGS Dicer Iso	720.25	631.75	815.875	16
ActinGS Dicer atg3 RNAi#2	lethal cross, excluded from screen
Iso atg3 RNAi#2
ActinGS Dicer Iso
ActinGS Dicer atg3 RNAi#3	880.25	840.625	1025.62	16
Iso atg3 RNAi#3	921	797.5	967.5	9
ActinGS Dicer Iso	930.25	872.125	1026.25	16
ActinGS Dicer atg4a RNAi#1	1021.25	983.875	1096.5	16
Iso atg4a RNAi#1	957.5	938.5	973.125	16
ActinGS Dicer Iso	720.25	631.75	815.875	16
ActinGS Dicer atg4a RNAi#2	908	839.375	986.125	16
Iso atg4a RNAi#2	836	748.125	947.625	16
ActinGS Dicer Iso	720.25	631.75	815.875	16
ActinGS Dicer atg4a RNAi#3	lethal cross, excluded from screen
Iso atg4a RNAi#3
ActinGS Dicer Iso
ActinGS Dicer atg4b RNAi#1	920.75	834.875	965.375	16
Iso atg4b RNAi#1	914.75	879	978.125	16
ActinGS Dicer Iso	720.25	631.75	815.875	16
ActinGS Dicer atg4b RNAi#2	910	838.25	936.5	15
Iso atg4b RNAi#2	797.5	756.5	914.75	16
ActinGS Dicer Iso	720.25	631.75	815.875	16
ActinGS Dicer atg4b RNAi#3	lethal cross, excluded from screen
Iso atg4b RNAi#3
ActinGS Dicer Iso
ActinGS Dicer atg5 RNAi#1	816	697.5	875.125	16
Iso atg5 RNAi#1	799.25	706.375	885.375	16
ActinGS Dicer Iso	720.25	631.75	815.875	16
ActinGS Dicer atg5 RNAi#2	828	725.75	919.25	15
Iso atg5 RNAi#2	842.5	778.5	928.875	16
ActinGS Dicer Iso	720.25	631.75	815.875	16
ActinGS Dicer atg5 RNAi#3	1124.5	1036.75	1162.75	15	failed secondary validation; NsybGS atg5 RNAi#1 was short-sleeping in first-pass run
Iso atg5 RNAi#3	977.25	898	1014.75	14
ActinGS Dicer Iso	720.25	631.75	815.875	16
ActinGS Dicer atg5 RNAi#4	941.75	872	997	14
Iso atg5 RNAi#4	949.5	886.25	990	16
ActinGS Dicer Iso	930.25	872.125	1026.25	16
ActinGS Dicer atg6 RNAi#1	819	788.375	858	16
Iso atg6 RNAi#1	916.25	831.75	1017.88	16
ActinGS Dicer Iso	720.25	631.75	815.875	16
ActinGS Dicer atg6 RNAi#2	865	815.75	919.25	11
Iso atg6 RNAi#2	866	806	935.5	11
ActinGS Dicer Iso	720.25	631.75	815.875	16
ActinGS Dicer atg6 RNAi#3	lethal cross, excluded from screen
Iso atg6 RNAi#3
ActinGS Dicer Iso
ActinGS Dicer atg7 RNAi#1	1174	1094.12	1210.5	16
Iso atg7 RNAi#1	955.5	927	1010.5	15
ActinGS Dicer Iso	720.25	631.75	815.875	16
ActinGS Dicer atg7 RNAi#2	982.75	922.125	1052.75	16
Iso atg7 RNAi#2	1030.75	978	1059.25	16
ActinGS Dicer Iso	720.25	631.75	815.875	16
ActinGS Dicer atg7 RNAi#3	713.25	606.5	799.25	16
Iso atg7 RNAi#3	798.25	774.25	863.5	16
ActinGS Dicer Iso	720.25	631.75	815.875	16
ActinGS Dicer atg7 RNAi#4	960	821.25	1000	16
Iso atg7 RNAi#4	814.25	726.375	865.125	16
ActinGS Dicer Iso	930.25	872.125	1026.25	16
ActinGS Dicer atg7 RNAi#5	lethal cross, excluded from screen
Iso atg7 RNAi#5
ActinGS Dicer Iso
ActinGS Dicer atg7 RNAi#6	lethal cross, excluded from screen
Iso atg7 RNAi#6
ActinGS Dicer Iso
ActinGS Dicer atg8a RNAi#1	837	780	888.5	13
Iso atg8a RNAi#1	905.75	849.625	962.25	14
ActinGS Dicer Iso	725.5	609.5	844	13
ActinGS Dicer atg8a RNAi#2	984.5	839.25	1090.25	15
Iso atg8a RNAi#2	907	860	986	15
ActinGS Dicer Iso	725.5	609.5	844	13
ActinGS Dicer atg8a RNAi#3	lethal cross, excluded from screen
Iso atg8a RNAi#3
ActinGS Dicer Iso
ActinGS Dicer atg8a RNAi#4	746.5	704.25	806.875	4
Iso atg8a RNAi#4	796	701.625	884.5	16
ActinGS Dicer Iso	930.25	872.125	1026.25	16
ActinGS Dicer atg8a RNAi#5	mostly lethal by end of recording, excluded from screen
Iso atg8a RNAi#5	790	730	873.75	16
ActinGS Dicer Iso	930.25	872.125	1026.25	16
ActinGS Dicer atg8b RNAi#1	1140.25	1097.5	1190.25	16
Iso atg8b RNAi#1	903	865.125	974.25	16
ActinGS Dicer Iso	725.5	609.5	844	13
ActinGS Dicer atg8b RNAi#2	1151	1109	1229	5
Iso atg8b RNAi#2	883	790.5	921.5	5
ActinGS Dicer Iso	725.5	609.5	844	13
ActinGS Dicer atg8b RNAi#3	lethal cross, excluded from screen
Iso atg8b RNAi#3
ActinGS Dicer Iso
ActinGS Dicer atg9 RNAi#1	943.5	868.5	977	15
Iso atg9 RNAi#1	1005.25	956.375	1032.5	14
ActinGS Dicer Iso	725.5	609.5	844	13
ActinGS Dicer atg9 RNAi#2	927.75	865.5	977.875	12
Iso atg9 RNAi#2	944	873	997.5	13
ActinGS Dicer Iso	725.5	609.5	844	13
ActinGS Dicer atg9 RNAi#3	920.5	873	947	9
Iso atg9 RNAi#3	991	913	1037.5	9
ActinGS Dicer Iso	725.5	609.5	844	13
ActinGS Dicer atg9 RNAi#4	lethal cross, excluded from screen
Iso atg9 RNAi#4
ActinGS Dicer Iso
ActinGS Dicer atg10 RNAi#1	906	875	945	5
Iso atg10 RNAi#1	900.5	873	967	5
ActinGS Dicer Iso	725.5	609.5	844	13
ActinGS Dicer atg10 RNAi#2	mostly lethal by end of recording, excluded from screen
Iso atg10 RNAi#2	873.5	764.5	938	5
ActinGS Dicer Iso	725.5	609.5	844	13
ActinGS Dicer atg10 RNAi#3	940	728.75	998.25	16	failed tertiary validation; second run had unexpected toxicity, cross excluded from further analysis
Iso atg10 RNAi#3	776	724.125	893.875	16
ActinGS Dicer Iso	633.75	522.125	713	12
ActinGS Dicer atg12 RNAi#1	925.5	894.5	964	16
Iso atg12 RNAi#1	881.75	812.625	983.375	16
ActinGS Dicer Iso	725.5	609.5	844	13
ActinGS Dicer atg12 RNAi#2	1116	1066.75	1166.5	15
Iso atg12 RNAi#2	960	934	1016	15
ActinGS Dicer Iso	725.5	609.5	844	13
ActinGS Dicer atg12 RNAi#3	664	584.5	737.5	9
Iso atg12 RNAi#3	725.5	662.5	864.125	16
ActinGS Dicer Iso	633.75	522.125	713	12
ActinGS Dicer atg13 RNAi#1	834	772.25	872.25	4
Iso atg13 RNAi#1	933.25	883.5	949.625	4
ActinGS Dicer Iso	725.5	609.5	844	13
ActinGS Dicer atg13 RNAi#2	778	721.25	871.375	10
Iso atg13 RNAi#2	860.75	803.125	922	10
ActinGS Dicer Iso	725.5	609.5	844	13
ActinGS Dicer atg13 RNAi#3	987.5	891.5	1013	16
Iso atg13 RNAi#3	925.5	841.875	976.375	16
ActinGS Dicer Iso	725.5	609.5	844	13
ActinGS Dicer atg14 RNAi#1	997.75	866.5	1017.25	14
Iso atg14 RNAi#1	976	896.125	1041.25	14
ActinGS Dicer Iso	725.5	609.5	844	13
ActinGS Dicer atg14 RNAi#2	942.5	888.5	1033.75	3
Iso atg14 RNAi#2	1064	1028	1110.25	3
ActinGS Dicer Iso	725.5	609.5	844	13
ActinGS Dicer atg14 RNAi#3	1013	890.25	1042.88	16
Iso atg14 RNAi#3	847.25	768.25	932.25	16
ActinGS Dicer Iso	725.5	609.5	844	13
ActinGS Dicer atg14 RNAi#4	726.5	707	793.5	7
Iso atg14 RNAi#4	618.5	581.25	691.5	15
ActinGS Dicer Iso	633.75	522.125	713	12
ActinGS Dicer atg16 RNAi#1	759.5	718.5	854.5	9
Iso atg16 RNAi#1	1016.5	974	1035.5	9
ActinGS Dicer Iso	725.5	609.5	844	13
ActinGS Dicer atg16 RNAi#2	905	868.25	1011.75	16
Iso atg16 RNAi#2	911.25	875.375	951	16
ActinGS Dicer Iso	725.5	609.5	844	13
ActinGS Dicer atg16 RNAi#3	847	800.75	921.5	16
Iso atg16 RNAi#3	932.5	821.5	1030.25	16
ActinGS Dicer Iso	725.5	609.5	844	13
ActinGS Dicer atg16 RNAi#4	524.5	435.5	686.25	15
Iso atg16 RNAi#4	732.25	686.125	785.25	16
ActinGS Dicer Iso	633.75	522.125	713	12
ActinGS Dicer atg16 RNAi#5	594.5	453.375	683.625	14
Iso atg16 RNAi#5	812.75	682.25	885.875	16
ActinGS Dicer Iso	633.75	522.125	713	12
ActinGS Dicer atg17 RNAi#1	954	911	1019	9
Iso atg17 RNAi#1	890	822	920	9
ActinGS Dicer Iso	725.5	609.5	844	13
ActinGS Dicer atg17 RNAi#2	860.5	825.125	1016.12	8
Iso atg17 RNAi#2	949.75	898.125	1015.88	8
ActinGS Dicer Iso	725.5	609.5	844	13
ActinGS Dicer atg101 RNAi#1	934.5	884.875	1065.88	14
Iso atg101 RNAi#1	824.5	730.75	875.5	15
ActinGS Dicer Iso	747.75	695.875	909.75	16
ActinGS Dicer atg101 RNAi#2	lethal cross, excluded from screen
Iso atg101 RNAi#2
ActinGS Dicer Iso
ActinGS Dicer atg101 RNAi#3	843	778.25	950.375	16
Iso atg101 RNAi#3	828.5	655.5	942	15
ActinGS Dicer Iso	778.25	673.375	935.875	16
ActinGS Dicer bip RNAi#1	lethal cross, excluded from screen
Iso bip RNAi#1
ActinGS Dicer Iso
ActinGS Dicer bip RNAi#2	lethal cross, excluded from screen
Iso bip RNAi#2
ActinGS Dicer Iso
ActinGS Dicer bip RNAi#3	lethal cross, excluded from screen
Iso bip RNAi#3
ActinGS Dicer Iso
ActinGS Dicer bnip3 RNAi#1	791.5	767	865.25	7
Iso bnip3 RNAi#1	956	875.5	1026.25	11
ActinGS Dicer Iso	676.5	552.25	765.625	16
ActinGS Dicer bnip3 RNAi#2	971.25	891.25	1013.62	16
Iso bnip3 RNAi#2	918.5	860.5	953.25	14
ActinGS Dicer Iso	676.5	552.25	765.625	16
ActinGS Dicer bnip3 RNAi#3	907.5	861.5	953.5	14
Iso bnip3 RNAi#3	918.5	893.375	973.125	14
ActinGS Dicer Iso	676.5	552.25	765.625	16
ActinGS Dicer cg43367 RNAi#1	945	890.875	1029	16
Iso cg43367 RNAi#1	931.25	884.875	1050	16
ActinGS Dicer Iso	753	587.25	899.25	15
ActinGS Dicer cg43367 RNAi#2	816.5	792	909.75	11
Iso cg43367 RNAi#2	902	844.25	953.5	15
ActinGS Dicer Iso	772.5	724.25	834.25	15
ActinGS Dicer cg43367 RNAi#3	966.5	920.75	1047.75	15
Iso cg43367 RNAi#3	906.5	865.875	935.875	16
ActinGS Dicer Iso	820	720.125	893.75	16
ActinGS Dicer cg43367 RNAi#4	880.5	867	1064.5	7
Iso cg43367 RNAi#4	895.75	770.625	969.625	16
ActinGS Dicer Iso	820	720.125	893.75	16
ActinGS Dicer daor RNAi#1	1172.5	1104.5	1234.5	5
Iso daor RNAi#1	963.5	875.75	1014.25	15
ActinGS Dicer Iso	701.25	550.25	769.75	16
ActinGS Dicer daor RNAi#2	775	695.625	932.5	16
Iso daor RNAi#2	922.25	856.75	974.25	16
ActinGS Dicer Iso	701.25	550.25	769.75	16
ActinGS Dicer dor RNAi#1	979.5	955.875	1093.88	6
Iso dor RNAi#1	931.25	867.75	1052.75	16
ActinGS Dicer Iso	676.5	552.25	765.625	16
ActinGS Dicer dor RNAi#2	1185	1117	1278	9
Iso dor RNAi#2	846.5	698.5	883.75	15
ActinGS Dicer Iso	676.5	552.25	765.625	16
ActinGS Dicer dram RNAi#1	944	867.375	994	16
Iso dram RNAi#1	949	895.25	1059.75	16
ActinGS Dicer Iso	676.5	552.25	765.625	16
ActinGS Dicer dram RNAi#2	1089.5	1028.5	1121	14
Iso dram RNAi#2	925	832.5	960.5	15
ActinGS Dicer Iso	676.5	552.25	765.625	16
ActinGS Dicer drpr RNAi#1	948.75	906.375	1092.25	16
Iso drpr RNAi#1	864.75	775.625	1011.62	16
ActinGS Dicer Iso	676.5	552.25	765.625	16
ActinGS Dicer drpr RNAi#2	749	667.5	902	16
Iso drpr RNAi#2	722	689.25	767.25	15
ActinGS Dicer Iso	676.5	552.25	765.625	16
ActinGS Dicer gyf RNAi#1	1006.5	890.875	1081.88	14
Iso gyf RNAi#1	923.5	831.875	1049.88	16
ActinGS Dicer Iso	755	585.625	820	14
ActinGS Dicer gyf RNAi#2	899.5	863	955.75	11
Iso gyf RNAi#2	950	866.125	1028.62	16
ActinGS Dicer Iso	689	481.5	730.5	13
ActinGS Dicer gyf RNAi#3	682.5	561.125	820.375	16	failed tertiary validation; not signficantly lower sleep in cross after second run
Iso gyf RNAi#3	870.5	824.625	909.5	16
ActinGS Dicer Iso	862	710.75	959.25	16
ActinGS Dicer ird1 RNAi#1	lethal cross, excluded from screen
Iso ird1 RNAi#1
ActinGS Dicer Iso
ActinGS Dicer ird1 RNAi#2	889.75	846.625	964.25	16
Iso ird1 RNAi#2	958.5	888.5	1018.25	15
ActinGS Dicer Iso	753	587.25	899.25	15
ActinGS Dicer ird1 RNAi#3	790.5	712.875	894.5	16
Iso ird1 RNAi#3	986	866.375	1047.38	16
ActinGS Dicer Iso	753	587.25	899.25	15
ActinGS Dicer ire1 RNAi#1	733.5	706.25	826	7
Iso ire1 RNAi#1	931.5	911.5	1026.5	7
ActinGS Dicer Iso	676.5	552.25	765.625	16
ActinGS Dicer ire1 RNAi#2	738.5	702.875	758.75	16
Iso ire1 RNAi#2	895	768.5	949.25	16
ActinGS Dicer Iso	676.5	552.25	765.625	16
ActinGS Dicer lamp1 RNAi#1	1145.25	1079.25	1180.62	16	failed secondary validation; ActinGS lamp1 RNAi#5 cross was short-sleeping in first-pass run
Iso lamp1 RNAi#1	1012	940.5	1025.5	9
ActinGS Dicer Iso	701.25	550.25	769.75	16
ActinGS Dicer lamp1 RNAi#2	934.25	877.75	963.125	16
Iso lamp1 RNAi#2	1021.5	951.75	1040.62	10
ActinGS Dicer Iso	701.25	550.25	769.75	16
ActinGS Dicer lamp1 RNAi#3	806.5	745.5	957.25	15
Iso lamp1 RNAi#3	957.25	892.625	995.875	16
ActinGS Dicer Iso	701.25	550.25	769.75	16
ActinGS Dicer lamp1 RNAi#4	1011.5	900	1059.12	16
Iso lamp1 RNAi#4	950.75	914.5	1041.5	16
ActinGS Dicer Iso	701.25	550.25	769.75	16
ActinGS Dicer lamp1 RNAi#5	396.5	315	585	15	failed secondary validation; ActinGS lamp1 RNAi#1 cross was long-sleeping in first-pass run
Iso lamp1 RNAi#5	818	668.75	887.75	15
ActinGS Dicer Iso	689	481.5	730.5	13
ActinGS Dicer lamp1 RNAi#6	781.75	736.5	874.25	16
Iso lamp1 RNAi#6	867	779	962.75	16
ActinGS Dicer Iso	791.5	592.875	911.125	16
ActinGS Dicer lrrk2 RNAi#1	746.5	717.5	852.5	16
Iso lrrk2 RNAi#1	828.75	666	948.625	16
ActinGS Dicer Iso	650	556.875	777.5	20
ActinGS Dicer lrrk2 RNAi#2	932.75	853.625	1025	16
Iso lrrk2 RNAi#2	921.75	831	948	16
ActinGS Dicer Iso	650	556.875	777.5	20
ActinGS Dicer mauve RNAi#1	1017.5	939.5	1092.75	15
Iso mauve RNAi#1	964	869.5	1026.75	15
ActinGS Dicer Iso	689	481.5	730.5	13
ActinGS Dicer mauve RNAi#2	793.75	750.5	917.75	16
Iso mauve RNAi#2	878.5	798.125	944.875	14
ActinGS Dicer Iso	772.5	724.25	834.25	15
ActinGS Dicer mauve RNAi#3	989.5	902.625	1146.25	14
Iso mauve RNAi#3	937	839.625	998.5	16
ActinGS Dicer Iso	862	710.75	959.25	16
ActinGS Dicer perk RNAi#1	708.5	616.25	890.375	16
Iso perk RNAi#1	802.5	696.5	872	15
ActinGS Dicer Iso	650	556.875	777.5	20
ActinGS Dicer perk RNAi#2	873	769.5	999	15
Iso perk RNAi#2	855.75	791	895.875	16
ActinGS Dicer Iso	650	556.875	777.5	20
ActinGS Dicer ref2p RNAi#1	996.5	935.75	1042.25	16
Iso ref2p RNAi#1	1023	851.25	1053.25	16
ActinGS Dicer Iso	791	686	997.25	14
ActinGS Dicer ref2p RNAi#2	1013.5	941	1058.5	16
Iso ref2p RNAi#2	1207.5	1146.75	1231.5	16
ActinGS Dicer Iso	791	686	997.25	14
ActinGS Dicer ref2p RNAi#3	742.25	688.75	853.25	12
Iso ref2p RNAi#3	892.5	868.25	959	16
ActinGS Dicer Iso	747.75	695.875	909.75	16
ActinGS Dicer rubicon RNAi#1	784	716.75	841.25	16
Iso rubicon RNAi#1	894	849.5	921	15
ActinGS Dicer Iso	650	556.875	777.5	20
ActinGS Dicer rubicon RNAi#2	889	751	936.25	3	failed tertiary validation; not significantly lower sleep in cross after second run
Iso rubicon RNAi#2	756	697.75	855.625	16
ActinGS Dicer Iso	650	556.875	777.5	20
ActinGS Dicer rubicon RNAi#3	922.75	858.25	1029.25	16
Iso rubicon RNAi#3	877.25	828.375	947.375	16
ActinGS Dicer Iso	650	556.875	777.5	20
ActinGS Dicer rugose RNAi#1	688.75	569.25	953.75	16
Iso rugose RNAi#1	859.5	724.75	929	15
ActinGS Dicer Iso	689	481.5	730.5	13
ActinGS Dicer rugose RNAi#2	720	625.5	881	13
Iso rugose RNAi#2	697.5	655.5	808.5	9
ActinGS Dicer Iso	689	481.5	730.5	13
ActinGS Dicer starvin RNAi#1	834.25	719.75	933.625	16
Iso starvin RNAi#1	887.5	827	984.25	16
ActinGS Dicer Iso	775	661.5	838.625	16
ActinGS Dicer starvin RNAi#2	799	734.75	898	15
Iso starvin RNAi#2	916	860.125	988.875	16
ActinGS Dicer Iso	700	604.5	775.5	13
ActinGS Dicer starvin RNAi#3	lethal cross, excluded from screen
Iso starvin RNAi#3
ActinGS Dicer Iso
ActinGS Dicer uvrag RNAi#1	lethal cross, excluded from screen
Iso uvrag RNAi#1
ActinGS Dicer Iso
ActinGS Dicer vamp7 RNAi#1	916.25	867.125	983.625	16
Iso vamp7 RNAi#1	908.5	859.25	987.125	16
ActinGS Dicer Iso	676.5	552.25	765.625	16
ActinGS Dicer vamp7 RNAi#2	1015.75	938.625	1098	14
Iso vamp7 RNAi#2	954.5	842	988	13
ActinGS Dicer Iso	676.5	552.25	765.625	16
ActinGS Dicer vps34 RNAi#1	lethal cross, excluded from screen
Iso vps34 RNAi#1
ActinGS Dicer Iso
ActinGS Dicer vps34 RNAi#2	lethal cross, excluded from screen
Iso vps34 RNAi#2
ActinGS Dicer Iso
ActinGS Dicer wacky RNAi#1	lethal cross, excluded from screen
Iso wacky RNAi#1
ActinGS Dicer Iso
ActinGS Dicer wacky RNAi#2	1129.25	1036.38	1239.25	4
Iso wacky RNAi#2	886.5	832.25	1006.38	16
ActinGS Dicer Iso	820	720.125	893.75	16
ActinGS Dicer wacky RNAi#3	lethal cross, excluded from screen
Iso wacky RNAi#3
ActinGS Dicer Iso
ActinGS Dicer wdr81 RNAi#1	812.5	735.875	887.5	16
Iso wdr81 RNAi#1	1011.5	946.375	1041.5	16
ActinGS Dicer Iso	775	661.5	838.625	16
ActinGS Dicer wdr81 RNAi#2	918.25	806.5	1018.12	16
Iso wdr81 RNAi#2	968	901.375	1024.5	16
ActinGS Dicer Iso	775	661.5	838.625	16
ActinGS Dicer xbp1 RNAi#2	lethal cross, excluded from screen
Iso xbp1 RNAi#2
ActinGS Dicer Iso
ActinGS Dicer xbp1 RNAi#3	750.25	690.125	789.375	14
Iso xbp1 RNAi#3	809.5	707.375	933.125	16
ActinGS Dicer Iso	820	720.125	893.75	16
ActinGS Dicer xbp1 RNAi#4	lethal cross, excluded from screen
Iso xbp1 RNAi#4
ActinGS Dicer Iso
ActinGS Dicer zonda RNAi#1	lethal cross, excluded from screen
Iso zonda RNAi#1
ActinGS Dicer Iso
